# Supplementary material for: Machine learning-assisted prediction of water adsorption isotherms and cooling performance
Source: Royal Society of Chemistry journal article supplement (doi:10.1039/d3ta03586g), 2023-01-01
Supplement: d3ta03586g1.pdf [file d3ta03586g1.pdf]

## Supporting Information

# Machine Learning-Assisted Prediction of Water Adsorption Isotherms and Cooling Performance

Zhilu Liu <sup>a</sup>, Dongchen Shen <sup>a</sup>, Shanshan Cai <sup>a</sup>, Zhengkai Tu <sup>a</sup> and Song Li <sup>a,\*</sup>

<sup>a</sup> Department of New Energy Science and Engineering, School of Energy and Power Engineering, Huazhong University of Science and Technology, Wuhan 430074, China.

\* Corresponding author email: [songli@hust.edu.cn](mailto:songli@hust.edu.cn)

| Contents                                                  | Page Number |
|-----------------------------------------------------------|-------------|
| S1. Supplementary table data                              | 2-33        |
| S2. Structural characteristics of experimental adsorbents | 34          |
| S3. Machine learning algorithms and details               | 35-39       |
| S4. Adsorption cooling performance calculation            | 40-42       |
| S5. Supplementary results of machine learning             | 43-47       |

## S1. Supplementary data in Excel file

**Table S1.** The literature source of 460 adsorbents used in this work

| Ref. No. | Title                                                                                                                                                                    | DOI                               | First author            | Year |
|----------|--------------------------------------------------------------------------------------------------------------------------------------------------------------------------|-----------------------------------|-------------------------|------|
| [1]      | Liquid Phase Heteroepitaxial Growth of Moisture-Tolerant MOF-5 Isotype Thin Films and Assessment of the Sorption Properties by Quartz Crystal Microbalance               | DOI: 10.1002/adfm.201302854       | Suttipong Wannapaiboon  | 2013 |
| [2]      | Design of Hydrophilic Metal Organic Framework Water Adsorbents for Heat Reallocation                                                                                     | DOI: 10.1002/adma.201502418       | Amandine Cadiau         | 2015 |
| [3]      | Enhancement of CO <sub>2</sub> Adsorption and CO <sub>2</sub> /N <sub>2</sub> Selectivity on ZIF-8 via Postsynthetic Modification                                        | DOI: 10.1002/Aic.13970            | Zhijuan Zhang           | 2013 |
| [4]      | Dynamic Structural Behavior and Anion-Responsive Tunable Luminescence of a Flexible Cationic Metal-Organic Framework                                                     | DOI: 10.1002/anie.201206724       | Biplab Manna            | 2013 |
| [5]      | A Water Stable Metal-Organic Framework with Optimal Features for CO <sub>2</sub> Capture                                                                                 | DOI: 10.1002/anie.201302682       | Qingyuan Yang           | 2013 |
| [6]      | Highly Hydrophobic Isorecticular Porous Metal-Organic Frameworks for the Capture of Harmful Volatile Organic Compounds                                                   | DOI: 10.1002/anie.201303484       | Natalia M. Padial       | 2013 |
| [7]      | Ultra-Tuning of the Rare-Earth fcu-MOF Aperture Size for Selective Molecular Exclusion of Branched Paraffins                                                             | DOI: 10.1002/anie.201506345       | Ayalew H. Assen         | 2015 |
| [8]      | A Robust Infinite Zirconium Phenolate Building Unit to Enhance the Chemical Stability of Zr MOFs                                                                         | DOI: 10.1002/anie.201507058       | Georges Mouchaham       | 2015 |
| [9]      | A Zeolite-Like Zinc Phosphonocarboxylate Framework and Its Transformation into Two- and Three-Dimensional Structures                                                     | DOI: 10.1002/asia.200700209       | Zhenxia Chen            | 2007 |
| [10]     | Two Zn II Metal-Organic Frameworks with Coordinatively Unsaturated Metal Sites: Structures, Adsorption, and Catalysis                                                    | DOI: 10.1002/asia.201200601       | Xiao-Ming Lin           | 2012 |
| [11]     | Chemical Property Change in a Metal-Organic Framework by Fluoro Functionality                                                                                            | DOI: 10.1002/bkcs.10087           | Nakeun Ko               | 2015 |
| [12]     | Microporous Metal-Organic Framework Constructed from Heptanuclear Zinc Carboxylate Secondary Building Units                                                              | DOI: 10.1002/chem.200500963       | Qian-Rong Fang          | 2006 |
| [13]     | A Porous Coordination Polymer with Accessible Metal Sites and its Complementary Coordination Action                                                                      | DOI: 10.1002/chem.200802730       | Hirotohi Sakamoto       | 2009 |
| [14]     | Flexible Metal-Organic Framework with Hydrophobic Pores                                                                                                                  | DOI: 10.1002/chem.201103078       | Lin-Hua Xie             | 2011 |
| [15]     | A Robust Porous Metal-Organic Framework with a New Topology That Demonstrates Pronounced Porosity and High-Efficiency Sorption/Selectivity Properties of Small Molecules | DOI: 10.1002/chem.201103687       | Huanhuan Li             | 2012 |
| [16]     | Decametalllic Co II -Cluster-Based Microporous Magnetic Framework with a Semirigid Multicoordinating Ligand                                                              | DOI: 10.1002/chem.201204458       | Jumei Tian              | 2013 |
| [17]     | A New Synthetic Route to Microporous Silica with Well-Defined Pores by Replication of a Metal-Organic Framework                                                          | DOI: 10.1002/chem.201501599       | Atsushi Kondo           | 2015 |
| [18]     | Topological Diversity, Adsorption and Fluorescence Properties of MOFs Based on a Tetracarboxylate Ligand                                                                 | DOI: 10.1002/ejic.201000415       | Ronny Gr nker           | 2010 |
| [19]     | Two 3D Supramolecular Isomeric Mixed-Ligand Co II Frameworks - Guest-Induced Structural Variation, Magnetism, and Selective Gas Adsorption                               | DOI: 10.1002/ejic.201200851       | Dan Liu                 | 2012 |
| [20]     | On the Physical Adsorption of Vapors by Microporous Carbons                                                                                                              | DOI: 10.1006/jcis.1995.1018       | R. H. Bradley           | 1995 |
| [21]     | Comparison of Gaseous Molecular Adsorption Properties of Microporous Manganese Oxides and Crystalline Aluminosilicates                                                   | DOI: 10.1006/jcis.2000.7399       | Z. M. Wang              | 2001 |
| [22]     | Activated Carbon Oxygen Content Influence on Water and Surfactant Adsorption                                                                                             | DOI: 10.1006/jcis.2001.8052       | Phillip Pendleton       | 2002 |
| [23]     | Adsorption of toluene and toluene-water vapor mixture on almond shell based activated carbons                                                                            | DOI: 10.1007/s10450-013-9540-5    | Alicia Mart nez de Yuso | 2013 |
| [24]     | Synthesis, structures and properties of three new compounds based on multidentate ligand containing triazole and pyrimidine                                              | DOI: 10.1007/s40242-015-5051-0    | Lei L                   | 2015 |
| [25]     | Adsorption of water vapor by non-porous carbons                                                                                                                          | DOI: 10.1016/0008-6223(92)90080-g | P. J. M. Carrott        | 1992 |
| [26]     | Evaluation of confinement effects in zeolites under Henry's adsorption regime                                                                                            | DOI: 10.1016/j.apsusc.2009.12.067 | Marc Pera-Titus         | 2010 |
| [27]     | CO <sub>2</sub> adsorption and catalytic application of Co-MOF-74 synthesized by microwave heating                                                                       | DOI: 10.1016/j.cattod.2011.08.019 | Hye-Young Cho           | 2012 |
| [28]     | Adsorption/catalytic properties of MIL-125 and NH <sub>2</sub> -MIL-125                                                                                                  | DOI: 10.1016/j.cattod.2012.08.014 | Se-Na Kim               | 2013 |
| [29]     | Adsorption characteristics of nanoporous carbon-silica composites synthesized from graphite oxide by a mechanochemical intercalation method                              | DOI: 10.1016/j.jcis.2007.04.016   | Y. H. Chu               | 2007 |
| [30]     | Adsorption of water on three-dimensional pillared-layer metal organic frameworks                                                                                         | DOI: 10.1016/j.jcis.2007.05.090   | Atsushi Kondo           | 2007 |
| [31]     | Syntheses, crystal structures, and water adsorption behaviors of jungle-gym-type porous coordination polymers containing nitro moieties                                  | DOI: 10.1016/j.jssc.2009.07.048   | Kazuhiro Uemura         | 2009 |
| [32]     | Simulations of model metal-organic frameworks for the separation of carbon dioxide                                                                                       | DOI: 10.1016/j.egypro.2011.01.090 | Brad A. Wells           | 2011 |
| [33]     | Water adsorption-desorption property of stable porous supramolecular assembly composed of discrete tetranuclear iron(III) complex using $\pi$ - $\pi$ interactions       | DOI: 10.1016/j.ica.2012.02.002    | □                       | 2012 |
| [34]     | Grafting of hydrophilic ethylene glycols or ethylenediamine on coordinatively unsaturated metal sites in MIL-100(Cr) for improved water adsorption characteristics       | DOI: 10.1016/j.ica.2013.07.024    | Martin Wickenheisser    | 2013 |
| [35]     | A 3D POM-MOF composite based on Ni(II) ion and 2,2'-bipyridyl-3,3'-dicarboxylic acid: Crystal structure and proton conductivity                                          | DOI: 10.1016/j.jssc.2013.03.041   | Meilin Wei              | 2013 |

|      |                                                                                                                                                                                                      |                                               |                       |      |
|------|------------------------------------------------------------------------------------------------------------------------------------------------------------------------------------------------------|-----------------------------------------------|-----------------------|------|
| [36] | Reversible flexible structural changes in multidimensional MOFs by guest molecules (I <sub>2</sub> , NH <sub>3</sub> ) and thermal stimulation                                                       | DOI: 10.1016/j.jssc.2015.02.014               | Yang Chen             | 2015 |
| [37] | Characterisation of metal organic frameworks for adsorption cooling                                                                                                                                  | DOI: 10.1016/j.ijheatmasstransfer.2012.07.068 | Ahmed Rezk            | 2012 |
| [38] | Design, structure and properties of a novel 3D metal-organic framework constructed from N-donor ligand supporting Cd(II)-carboxylate layer                                                           | DOI: 10.1016/j.inoche.2006.02.029             | Ming Xue              | 2006 |
| [39] | Adsorption-desorption of water vapour on chars prepared from commercial wood charcoals, in relation to their chemical composition, surface chemistry and pore structure                              | DOI: 10.1016/j.jaap.2010.03.005               | J. Pastor-Villegas    | 2010 |
| [40] | Sulfation of metal-organic frameworks: Opportunities for acid catalysis and proton conductivity                                                                                                      | DOI: 10.1016/j.jcat.2011.04.015               | Maarten G             | 2011 |
| [41] | Characterization of metal-organic frameworks by water adsorption                                                                                                                                     | DOI: 10.1016/j.micromeso.2008.11.020          | Pia Küsgens           | 2009 |
| [42] | Effect of functional groups in MIL-101 on water sorption behavior                                                                                                                                    | DOI: 10.1016/j.micromeso.2012.01.015          | George Akiyama        | 2012 |
| [43] | Bench-scale preparation of Cu <sub>3</sub> (BTC) <sub>2</sub> by ethanol reflux: Synthesis optimization and adsorption/catalytic applications                                                        | DOI: 10.1016/j.micromeso.2012.05.021          | Jun Kim               | 2012 |
| [44] | Thermogravimetric and adsorption studies of oxidized active carbons by using different probe molecules                                                                                               | DOI: 10.1016/s0040-6031(99)00375-5            | Zuojiang Li           | 2000 |
| [45] | Binary mixture adsorption of water and ethanol on silicalite                                                                                                                                         | DOI: 10.1016/S0167-2991(02)80329-9            | Y. Oumi               | 2002 |
| [46] | Single-component gas phase adsorption and desorption studies using a tapered element oscillating microbalance                                                                                        | DOI: 10.1016/S1387-1811(02)00428-6            | Arjan Giaya           | 2002 |
| [47] | Defect Control To Enhance Proton Conductivity in a Metal-Organic Framework                                                                                                                           | DOI: 10.1021/acs.chemmater.5b00665            | Jared M. Taylor       | 2015 |
| [48] | Hydrostable and Nitril/Methyl-Functionalized Metal-Organic Framework for Drug Delivery and Highly Selective CO <sub>2</sub> Adsorption                                                               | DOI: 10.1021/acs.inorgchem.5b00335            | De-Yun Ma             | 2015 |
| [49] | H <sub>2</sub> O Adsorption/Desorption in MOF-74: Ab Initio Molecular Dynamics and Experiments                                                                                                       | DOI: 10.1021/acs.jpcc.5b02069                 | Yunsong Li            | 2015 |
| [50] | Solubility of Gases in Water Confined in Nanoporous Materials: ZSM-5, MCM-41, and MIL-100                                                                                                            | DOI: 10.1021/acs.jpcc.5b06660                 | Linh Ngoc Ho          | 2015 |
| [51] | Three-Dimensional Robust Porous Coordination Polymer with Schiff Base Site on the Pore Wall: Synthesis, Single-Crystal-to-Single-Crystal Reversibility, and Selective CO <sub>2</sub> Adsorption     | DOI: 10.1021/Cg2004672                        | Rajdip Dey            | 2011 |
| [52] | Variable Water Adsorption in Amino Acid Derivative Based Homochiral Metal Organic Frameworks                                                                                                         | DOI: 10.1021/Cg3008443                        | Tanay Kundu           | 2012 |
| [53] | A CdSO <sub>4</sub> -Type 3D Metal-Organic Framework Showing Coordination Dynamics on Cu <sub>2</sub> +Axial Sites: Vapochromic Response and Guest Sorption Selectivity                              | DOI: 10.1021/Cg3017563                        | Guo-Bi Li             | 2013 |
| [54] | A Series of Three-Dimensional Lanthanide Coordination Compounds with the Rutile Topology                                                                                                             | DOI: 10.1021/Cg800204q                        | Xiaojun Zhao          | 2009 |
| [55] | Immobilization of Alkali Metal Ions in a 3D Lanthanide-Organic Framework: Selective Sorption and H <sub>2</sub> Storage Characteristics                                                              | DOI: 10.1021/Cm9014749                        | Sudip Mohapatra       | 2009 |
| [56] | Investigation of Porous Ni-Based Metal-Organic Frameworks Containing Paddle-Wheel Type Inorganic Building Units via High-Throughput Methods                                                          | DOI: 10.1021/Ic200381f                        | Palanikumar Maniam    | 2011 |
| [57] | A Vanadium (VO <sub>2</sub> <sup>+</sup> ) Metal-Organic Framework: Selective Vapor Adsorption, Magnetic Properties, and Use as a Precursor for a Polyoxovanadate                                    | DOI: 10.1021/Ic200463k                        | Prakash Kanoo         | 2011 |
| [58] | Flexible and Hydrophobic Zn-Based Metal-Organic Framework                                                                                                                                            | DOI: 10.1021/Ic200937u                        | Ines Maria Hauptvogel | 2011 |
| [59] | Bistable Dynamic Coordination Polymer Showing Reversible Structural and Functional Transformations                                                                                                   | DOI: 10.1021/Ic301481p                        | Sanjog S              | 2012 |
| [60] | Gas Storage in a Partially Fluorinated Highly Stable Three-Dimensional Porous Metal-Organic Framework                                                                                                | DOI: 10.1021/Ic302645rb                       | Atanu Santra          | 2013 |
| [61] | Third-Generation Breathing Metal-Organic Framework with Selective, Stepwise, Reversible, and Hysteretic Adsorption Properties                                                                        | DOI: 10.1021/Ic402095u                        | Suresh Sanda          | 2013 |
| [62] | Stoichiometry-Controlled Two Flexible Interpenetrated Frameworks: Higher CO <sub>2</sub> Uptake in a Nanoscale Counterpart Supported by Accelerated Adsorption Kinetics                              | DOI: 10.1021/Ic500234r                        | Nivedita Sikdar       | 2014 |
| [63] | Conformation-Controlled Sorption Properties and Breathing of the Aliphatic Al-MOF [Al(OH)(CDC)]                                                                                                      | DOI: 10.1021/Ic500288w                        | Felicita Niekpiel     | 2014 |
| [64] | Effect of Water Adsorption on Retention of Structure and Surface Area of Metal-Organic Frameworks                                                                                                    | DOI: 10.1021/Ic202325p                        | Paul M. Schoencker    | 2012 |
| [65] | Zn(tbip) (H <sub>2</sub> tbip= 5-tert-Butyl Isophthalic Acid): A Highly Stable Guest-Free Microporous Metal Organic Framework with Unique Gas Separation Capability                                  | DOI: 10.1021/Ja057667b                        | Long Pan              | 2006 |
| [66] | A Porous Framework Polymer Based on a Zinc(II) 4,4'-Bipyridine-2,6,2',6'-tetracarboxylate: Synthesis, Structure, and "Zeolite-Like" Behaviors                                                        | DOI: 10.1021/Ja060946u                        | Xiang Lin             | 2006 |
| [67] | Reversible Water-Induced Magnetic and Structural Conversion of a Flexible Microporous Ni(II)/Fe(III) Ferromagnet                                                                                     | DOI: 10.1021/Ja069166b                        | Nobuhiro Yanai        | 2007 |
| [68] | Explanation of the Adsorption of Polar Vapors in the Highly Flexible Metal Organic Framework MIL-53(Cr)                                                                                              | DOI: 10.1021/ja1023282                        | Sandrine Bourrelly    | 2010 |
| [69] | A Sodalite-Type Porous Metal-Organic Framework with Polyoxometalate Templates: Adsorption and Decomposition of Dimethyl Methylphosphonate                                                            | DOI: 10.1021/Ja109659k                        | Feng-Ji Ma            | 2011 |
| [70] | Super Flexibility of a 2D Cu-Based Porous Coordination Framework on Gas Adsorption in Comparison with a 3D Framework of Identical Composition: Framework Dimensionality-Dependent Gas Adsorptivities | DOI: 10.1021/Ja201170c                        | Atsushi Kondo         | 2011 |
| [71] | Hydroxyl Group Recognition by Hydrogen-Bonding Donor and Acceptor Sites Embedded in a Layered Metal-Organic Framework                                                                                | DOI: 10.1021/Ja203291n                        | Masaaki Sadakiyo      | 2011 |
| [72] | Capture of Nerve Agents and Mustard Gas Analogues by Hydrophobic Robust MOF-5 Type Metal-Organic Frameworks                                                                                          | DOI: 10.1021/Ja2042113                        | Carmen Montoro        | 2011 |
| [73] | Helical Water Chain Mediated Proton Conductivity in Homochiral Metal-Organic Frameworks with Unprecedented Zeoliticunh-Topology                                                                      | DOI: 10.1021/Ja2078637                        | Subash Chandra Sahoo  | 2011 |
| [74] | Enhancing Water Stability of Metal-Organic Frameworks via Phosphonate Monoester Linkers                                                                                                              | DOI: 10.1021/Ja306812r                        | Jared M. Taylor       | 2012 |
| [75] | Water Adsorption in Porous Metal-Organic Frameworks and Related Materials                                                                                                                            | DOI: 10.1021/Ja500330a                        | Hiroyasu Furukawa     | 2014 |
| [76] | Adsorption Isotherms of Water, Propan-2-ol, and Methylbenzene Vapors on Grade 03 Silica Gel, Sorbonorit 4 Activated Carbon, and HiSiv 3000 Zeolite                                                   | DOI: 10.1021/je400517c                        | Józef Nastaj          | 2013 |

|       |                                                                                                                                                                                                                                      |                         |                    |      |
|-------|--------------------------------------------------------------------------------------------------------------------------------------------------------------------------------------------------------------------------------------|-------------------------|--------------------|------|
| [77]  | Uncommon Adsorption Isotherm of Methanol on a Hydrophobic Y-zeolite                                                                                                                                                                  | DOI: 10.1021/Jp0103530  | Istvan Halasz      | 2001 |
| [78]  | Molecular Understanding for the Adsorption of Water and Alcohols in Hydrophilic and Hydrophobic Zeolitic Metal–Organic Frameworks                                                                                                    | DOI: 10.1021/Jp1033273  | Anjaiah Nalaparaju | 2010 |
| [79]  | Molecular Simulation of Water/Alcohol Mixtures' Adsorption and Diffusion in Zeolite 4A Membranes                                                                                                                                     | DOI: 10.1021/Jp805923k  | Jian Yang Wu       | 2009 |
| [80]  | Probing the Mechanism of Water Adsorption in Carbon Micropores with Multitemperature Isotherms and Water Preadsorption Experiments                                                                                                   | DOI: 10.1021/la061140a  | S. W. Rutherford   | 2006 |
| [81]  | CO <sub>2</sub> /H <sub>2</sub> O Adsorption Equilibrium and Rates on Metal–Organic Frameworks: HKUST-1 and Ni/DOBDC                                                                                                                 | DOI: 10.1021/La102359q  | Jian Liu           | 2010 |
| [82]  | Electron Microscopic Study on Aerosol-Assisted Synthesis of Aluminum Organophosphonates Using Flexible Colloidal PS-b-PEO Templates                                                                                                  | DOI: 10.1021/La302695q  | Tatsuo Kimura      | 2012 |
| [83]  | Adjusting the Stability of Metal–Organic Frameworks under Humid Conditions by Ligand Functionalization                                                                                                                               | DOI: 10.1021/La304151r  | Himanshu Jasuja    | 2012 |
| [84]  | Synthesis of Cobalt-, Nickel-, Copper-, and Zinc-Based, Water-Stable, Pillared Metal–Organic Frameworks                                                                                                                              | DOI: 10.1021/La503269f  | Himanshu Jasuja    | 2014 |
| [85]  | Reversible Structural Change of Cu-MOF on Exposure to Water and Its CO <sub>2</sub> Adsorptivity                                                                                                                                     | DOI: 10.1021/la803818p  | Yan Cheng          | 2009 |
| [86]  | Experimental Study of Water Adsorption on Activated Carbons                                                                                                                                                                          | DOI: 10.1021/la980492h  | Issa I. Salame     | 1999 |
| [87]  | A flexible interpenetrating coordination framework with a bimodal porous functionality                                                                                                                                               | DOI: 10.1038/Nmat1827   | Tapas Kumar Maji   | 2007 |
| [88]  | Selective guest sorption in an interdigitated porous framework with hydrophobic pore surfaces                                                                                                                                        | DOI: 10.1039/B703502k   | Satoshi Horike     | 2007 |
| [89]  | A cubic coordination framework constructed from benzobistriazolate ligands and zinc ions having selective gas sorption properties                                                                                                    | DOI: 10.1039/B904280f   | Shyam Biswas,      | 2009 |
| [90]  | Enhanced selectivity of CO <sub>2</sub> from a ternary gas mixture in an interdigitated porous framework                                                                                                                             | DOI: 10.1039/C0cc00027b | Keiji Nakagawa     | 2010 |
| [91]  | A microporous luminescent metal–organic framework for highly selective and sensitive sensing of Cu <sup>2+</sup> in aqueous solution                                                                                                 | DOI: 10.1039/C0cc00148a | Yunqing Xiao       | 2010 |
| [92]  | Construction of a trigonal bipyramidal cage-based metal–organic framework with hydrophilic pore surface via flexible tetrapodal ligands                                                                                              | DOI: 10.1039/C0cc02496a | Tian-Fu Liu        | 2010 |
| [93]  | Single-crystal-to-single-crystal transformations and selective adsorption of porous copper(ii) frameworks                                                                                                                            | DOI: 10.1039/C0cc04689b | Man-Sheng Chen     | 2011 |
| [94]  | Selective carbon dioxide uptake and crystal-to-crystal transformation: porous 3D framework to 1D chain triggered by conformational change of the spacer                                                                              | DOI: 10.1039/C1cc05847a | Ritesh Haldar      | 2012 |
| [95]  | CO <sub>2</sub> capture and conversion using Mg-MOF-74 prepared by a sonochemical method                                                                                                                                             | DOI: 10.1039/C1cc02234b | Da-Ae Yang         | 2012 |
| [96]  | A microporous metal–organic framework with high stability for GC separation of alcohols from water                                                                                                                                   | DOI: 10.1039/C2cc33023g | Tsolmon Borjigin   | 2012 |
| [97]  | Post-synthesis functionalization of MIL-101 using diethylenetriamine: a study on adsorption and catalysis                                                                                                                            | DOI: 10.1039/C2cc06608d | Se-Na Kim          | 2012 |
| [98]  | Controlled modification of the inorganic and organic bricks in an Al-based MOF by direct and post-synthetic synthesis routes                                                                                                         | DOI: 10.1039/C2cc06620c | Tim Ahnfeldt       | 2012 |
| [99]  | Two ligand-functionalized Pb(ii) metal–organic frameworks: structures and catalytic performances                                                                                                                                     | DOI: 10.1039/C2dt30935a | Xiao-Ming Lin      | 2012 |
| [100] | Carbon dioxide adsorption by physisorption and chemisorption interactions in piperazine-grafted Ni <sub>2</sub> (dobdc) (dobdc = 1,4-dioxido-2,5-benzenedicarboxylate)                                                               | DOI: 10.1039/C2dt31112g | Anita Das          | 2012 |
| [101] | A robust microporous metal–organic framework constructed from a flexible organic linker for highly selective sorption of methanol over ethanol and water                                                                             | DOI: 10.1039/C2jm15604k | Qian Huang         | 2012 |
| [102] | Reversible solid-state hydration and dehydration process involving anion transfer in a self-assembled Cu <sub>2</sub> system                                                                                                         | DOI: 10.1039/C2ra21865h | T. Washizaki       | 2012 |
| [103] | A charge-polarized porous metal–organic framework for gas chromatographic separation of alcohols from water                                                                                                                          | DOI: 10.1039/C3cc38260e | Jian-Ke Sun        | 2013 |
| [104] | Polyoxometalate-based purely inorganic porous frameworks with selective adsorption and oxidative catalysis functionalities                                                                                                           | DOI: 10.1039/C3cc40990b | Ding Liu           | 2013 |
| [105] | Environmentally friendly synthesis of highly hydrophobic and stable MIL-53 MOF nanomaterials                                                                                                                                         | DOI: 10.1039/C3cc42287a | Jia Liu            | 2013 |
| [106] | An unusual highly connected 3D net with hydrophilic pore surface                                                                                                                                                                     | DOI: 10.1039/C3cc26788a | Huabin Zhang       | 2013 |
| [107] | Toxic gas removal – metal–organic frameworks for the capture and degradation of toxic gases and vapours                                                                                                                              | DOI: 10.1039/C3cs60475f | Elisa Barea        | 2014 |
| [108] | Selective CO <sub>2</sub> adsorption and proton conductivity in the two-dimensional Zn(ii) framework with protruded water molecules and flexible ether linkers                                                                       | DOI: 10.1039/C3dt50896j | Won Ju Phang       | 2013 |
| [109] | Zn(ii) coordination polymer of an in situ generated 4-pyridyl (4Py) attached bis(amido)phosphate ligand, [PO <sub>2</sub> (NH <sub>4</sub> Py) <sub>2</sub> ] <sup>–</sup> showing preferential water uptake over aliphatic alcohols | DOI: 10.1039/C3dt51123e | Arvind K. Gupta,   | 2013 |
| [110] | Postsynthetic tuning of hydrophilicity in pyrazolate MOFs to modulate water adsorption properties                                                                                                                                    | DOI: 10.1039/C3cc40876k | Casey R. Wade      | 2013 |
| [111] | Synthesis of reduced graphene oxide/phenolic resin-based carbon composite ultrafine fibers and their adsorption performance for volatile organic compounds and water                                                                 | DOI: 10.1039/c3ta10545h | Yu Bai             | 2013 |
| [112] | Water adsorption in MOFs: fundamentals and applications                                                                                                                                                                              | DOI: 10.1039/C4cs00078a | Jérôme Canivet     | 2014 |
| [113] | A highly stable multifunctional three-dimensional microporous framework: excellent selective sorption and visible photoluminescence                                                                                                  | DOI: 10.1039/C4dt00230j | Yumei Huang        | 2014 |
| [114] | Manufacture of dense CAU-10-H coatings for application in adsorption driven heat pumps: optimization and characterization                                                                                                            | DOI: 10.1039/c5cc00789e | M. F. de Lange     | 2015 |
| [115] | New layered copper 1,3,5-benzenetriphosphonates pillared with N-donor ligands: their synthesis, crystal structures, and adsorption properties                                                                                        | DOI: 10.1039/c5dt01137j | Atsushi Kondo      | 2015 |
| [116] | Water stable triazolyl phosphonate MOFs: steep water uptake and facile regeneration                                                                                                                                                  | DOI: 10.1039/c5dt02651b | S. Begum           | 2015 |
| [117] | Rational design of a pyrene based luminescent porous supramolecular framework: excimer emission and energy transfer                                                                                                                  | DOI: 10.1039/c5ra14267a | Komal Prasad       | 2015 |
| [118] | Synthesis, Structure, and Properties of a Chiral Zinc(II) Metal-Organic Framework Featuring Linear Trinuclear Secondary Building Blocks                                                                                              | DOI: 10.1071/Ch12270    | Zilu Chen          | 2012 |

|       |                                                                                                                                                            |                                     |                          |      |
|-------|------------------------------------------------------------------------------------------------------------------------------------------------------------|-------------------------------------|--------------------------|------|
| [119] | A porous Cu(II)-MOF containing [PW12O40]3- and a large protonated water cluster: synthesis, structure, and proton conductivity                             | DOI: 10.1080/00958972.2014.957689   | Meilin Wei               | 2014 |
| [120] | Adsorption of Radon and Water Vapor on Commercial Activated Carbons                                                                                        | DOI: 10.1080/01496399508225610      | Neguib M. Hassan         | 1995 |
| [121] | Molecular Simulation Study on Adsorption and Diffusion Behavior of Ethanol/Water Molecules in NaA Zeolite Crystal                                          | DOI: 10.1252/Jcej.37.67             | Shin-ichi Furukawa       | 2004 |
| [122] | Dependence of Water Vapour Adsorption on the Polarity of the Graphene Surfaces of Multi-wall Carbon Nanotubes                                              | DOI: 10.1260/0263-6174.28.10.903    | Robert Bradley           | 2010 |
| [123] | Enhanced Adsorption of Methanol by Oxidised Nutshell Carbon                                                                                                | DOI: 10.1260/0263617001493422       | Alan Bailey              | 2000 |
| [124] | A Stable Polyoxometalate-Pillared Metal-Organic Framework for Proton-Conducting and Colorimetric Biosensing                                                | DOI: 10.1002/chem.201501515         | En-Long Zhou             | 2015 |
| [125] | Protection of open-metal V(III) sites and their associated CO2/CH4/N2/O2/H2O adsorption properties in mesoporous V-MOFs                                    | DOI: 10.1016/j.jcis.2015.06.036     | Jiangfeng Yang           | 2015 |
| [126] | Stability of an Al-Fumarate MOF and Its Potential for CO2 Capture from Wet Stream                                                                          | DOI: 10.1021/acs.iecr.5b03509       | Juliana A. Coelho        | 2016 |
| [127] | A metal-organic framework constructed using a flexible tripodal ligand and tetranuclear copper cluster for sensing small molecules                         | DOI: 10.1039/c5dt00762c             | Chaoyi Hou               | 2015 |
| [128] | Enhancing the Water Capacity in Zr-based Metal-Organic Framework for Heat Pump and Atmospheric Water Generator Applications                                | DOI: 10.1021/acsanm.9b00416         | A. Luna-Triguero         | 2019 |
| [129] | A robust large-pore zirconium carboxylate metal-organic framework for energy-efficient water-sorption-driven refrigeration                                 | □                                   | Sujing Wang              | 2018 |
| [130] | The porous metal-organic framework CUK-1 for adsorption heat allocation toward green applications of natural refrigerant water                             | DOI: 10.1021/acsami.9b02605         | Ji Sun Lee               | 2019 |
| [131] | A metal-organic framework for efficient waterbased ultra-low-temperature-driven cooling                                                                    | DOI: 10.1038/s41467-019-10960-0     | Dirk Lenzen              | 2019 |
| [132] | Record Atmospheric Fresh Water Capture and Heat Transfer with a Material Operating at the Water Uptake Reversibility Limit                                 | DOI: 10.1021/acscentsci.7b00186     | Adam J. Rieth            | 2017 |
| [133] | Tunable Water and CO2 Sorption Properties in Isostructural AzineBased Covalent Organic Frameworks through Polarity Engineering                             | DOI: 10.1021/acs.chemmater.5b02151  | Linus Stegbauer          | 2015 |
| [134] | Pd loaded amphiphilic COF as catalyst for multi-fold Heck reactions, C-C couplings and CO oxidation                                                        | DOI: 10.1038/srep10876              | Dinesh Mullangi          | 2015 |
| [135] | Pore surface engineering in porous, chemically stable covalent organic frameworks for water adsorption†                                                    | DOI: 10.1039/c5ta07998e             | Bishnu P. Biswal         | 2015 |
| [136] | Constructing Ultraporous Covalent Organic Frameworks in Seconds via an Organic Terracotta Process                                                          | DOI: 10.1021/jacs.6b08815           | Suwendu Karak            | 2017 |
| [137] | Microporous Cyanate Resins: Synthesis, Porous Structure, and Correlations with Gas and Vapor Adsorptions                                                   | DOI:10.1021/ma3008652               | Hao Yu                   | 2012 |
| [138] | Nitrogen-Rich Covalent Triazine Frameworks as High-Performance Platforms for Selective Carbon Capture and Storage                                          | DOI: 10.1021/acs.chemmater.5b03330  | Stephan Hug              | 2015 |
| [139] | Base-Free Aqueous-Phase Oxidation of 5-Hydroxymethylfurfural over Ruthenium Catalysts Supported on Covalent Triazine Frameworks                            | DOI:10.1002/essc.201501106.         | Jens Artz                | 2015 |
| [140] | A mixed-linker approach towards improving covalent triazine-based frameworks for CO2 capture and separation                                                | DOI:10.1016/j.micromeso.2016.11.033 | Subarna Dey              | 2017 |
| [141] | Two linkers are better than one: enhancing CO2 capture and separation with porous covalent triazine-based frameworks from mixed nitrile linkers            | DOI: 10.1039/c6ta07076k             | Subarna Dey              | 2017 |
| [142] | Preparation of covalent triazine frameworks with imidazolium cations embedded in basic sites and their application for CO2 capture                         | DOI: 10.1039/c6ta11226a             | Kwangho Park             | 2017 |
| [143] | A fluorine-containing hydrophobic covalent triazine framework with excellent selective CO2 capture performance                                             | DOI: 10.1039/c7ta08913a             | Guangbo Wang             | 2018 |
| [144] | Mesoporous Conjugated Polycarbazole with High Porosity via Structure Tuning                                                                                | DOI:10.1021/ma501330v               | Qi Chen                  | 2014 |
| [145] | Adsorption performance and catalytic activity of porous conjugated polyporphyrins via carbazolebased oxidative coupling polymerization                     | DOI: 10.1039/c3py01430d             | Li-Juan Feng             | 2014 |
| [146] | Microporous Poly(Schiff Base) Constructed from Tetraphenyladamantane Units for Adsorption of Gases and Organic Vapors                                      | DOI: 10.1002/marc.201400013         | Guiyang Li               | 2014 |
| [147] | Microporous polyimides with functional groups for the adsorption of carbon dioxide and organic vapors                                                      | DOI: 10.1039/c6ta04337b             | Guiyang Li               | 2016 |
| [148] | Evaluation of a robust, diimide-based, porous organic polymer (POP) as a high-capacity sorbent for representative chemical threats                         | DOI 10.1007/s10934-011-9468-7       | Gregory W. Peterson      | 2012 |
| [149] | Tailoring Pore Structure and Properties of Functionalized Porous Polymers by Cyclotrimerization                                                            | DOI:10.1021/ma500512j               | Florian M. Wieser        | 2014 |
| [150] | Microporous Organic Polyimides for CO2 and H2O Capture and Separation from CH4 and N2 Mixtures: Interplay between Porosity and Chemical Function           | DOI: 10.1021/acs.chemmater.6b01949  | Christoph Klumpen        | 2016 |
| [151] | Reversible water capture by a charged metal-free porous polymer                                                                                            | DOI:10.1016/j.polymer.2017.05.071   | J. Byun                  | 2017 |
| [152] | Epoxy-Functionalized Porous Organic Polymers via the Diels-Alder Cycloaddition Reaction for Atmospheric Water Capture                                      | DOI:10.1002/ange.201800380          | Yearin Byun              | 2018 |
| [153] | New element organic frameworks via Suzuki coupling with high adsorption capacity for hydrophobic molecules                                                 | DOI: 10.1039/c003130e               | Marcus Rose              | 2010 |
| [154] | Guest-Responsive Reversible Swelling and Enhanced Fluorescence in a Super-Absorbent, Dynamic Microporous Polymer                                           | DOI: 10.1002/chem.201103750         | K. Venkata Rao           | 2012 |
| [155] | Butanol Separation from Humid CO2-Containing Multicomponent Vapor Mixtures by Zeolitic Imidazolate Frameworks                                              | DOI: 10.1021/acssuschemeng.7b02604  | Souryadeep Bhattacharyya | 2017 |
| [156] | Separation of CO2 in a Solid Waste Management Incineration Facility Using Activated Carbon Derived from Pine Sawdust                                       | DOI: 10.3390/en10060827             | Inés Durán               | 2017 |
| [157] | Rapid Cycling and Exceptional Yield in a Metal-Organic Framework Water Harvester                                                                           | DOI: 10.1021/acscentsci.9b00745     | Nikita Hanikel           | 2019 |
| [158] | A copper (II)-paddlewheel metal-organic framework with exceptional hydrolytic stability and selective adsorption and detection ability of aniline in water | DOI: 10.1021/acsami.7b07920         | Ya Chen                  | 2017 |
| [159] | Tuning water sorption in highly stable Zr (IV)-metal-organic frameworks through local functionalization of metal clusters                                  | DOI: 10.1021/acsami.8b09333         | Yong-Zheng Zhang         | 2018 |
| [160] | Base-resistant ionic metal-organic framework as a porous ion-exchange sorbent                                                                              | DOI: 10.1016/j.isci.2018.04.004     | Aamod V. Desai           | 2018 |
| [161] | Principles of designing extra-large pore openings and cages in zeolitic imidazolate frameworks                                                             | DOI: 10.1021/jacs.7b02272           | Jingjing Yang            | 2017 |

|       |                                                                                                                                                                                  |                                    |                      |      |
|-------|----------------------------------------------------------------------------------------------------------------------------------------------------------------------------------|------------------------------------|----------------------|------|
| [162] | Zr-and Hf-based metal-organic frameworks: tracking down the polymorphism                                                                                                         | DOI: 10.1021/cg301691d             | Volodymyr Bon        | 2013 |
| [163] | The synergistic effect of oxygen and water on the stability of the isostructural family of metal-organic frameworks [Cr 3 (BTC) 2] and [Cu 3 (BTC) 2]                            | DOI: 10.1039/C7DT02957H            | Zhuoming Zhang       | 2017 |
| [164] | Stable Aluminum Metal-Organic Frameworks (Al-MOFs) for Balanced CO2 and Water Selectivity                                                                                        | DOI: 10.1021/acsami.7b17026        | Haiwei Li            | 2018 |
| [165] | High CO 2/N 2/O 2/CO separation in a chemically robust porous coordination polymer with low binding energy                                                                       | DOI: 10.1039/C3SC52177J            | Jingui Duan          | 2014 |
| [166] | Stability and degradation mechanisms of metal-organic frameworks containing the Zr 6 O 4 (OH) 4 secondary building unit                                                          | DOI: 10.1039/C3TA10662D            | Jared B. DeCoste     | 2013 |
| [167] | A highly stable metal-organic framework with optimum aperture size for CO2 capture                                                                                               | DOI: 10.1002/aic.15837             | Zhigang Hu           | 2017 |
| [168] | UiO-67-type metal-organic frameworks with enhanced water stability and methane adsorption capacity                                                                               | DOI: 10.1021/acs.inorgchem.5b02257 | Sigurd Øien-Ødegaard | 2016 |
| [169] | Structural Stability of N-Alkyl-Functionalized Titanium Metal-Organic Frameworks in Aqueous and Humid Environments                                                               | DOI: 10.1021/acsami.7b15045        | Matthew W. Logan     | 2017 |
| [170] | A fine-tuned MOF for gas and vapor separation: A multipurpose adsorbent for acid gas removal, dehydration, and BTX sieving                                                       | DOI: 10.1016/j.chempr.2017.09.002  | M. Infas H. Mohideen | 2017 |
| [171] | Antenna-protected metal-organic squares for water/ammonia uptake with excellent stability and regenerability                                                                     | DOI: 10.1021/acssuschemeng.7b00460 | Yang Chen            | 2017 |
| [172] | Water-Stable Metal-Organic Framework with Three Hydrogen-Bond Acceptors: Versatile Theoretical and Experimental Insights into Adsorption Ability and Thermo-Hydrolytic Stability | DOI: 10.1021/acs.inorgchem.8b00078 | Kornel Roztock       | 2018 |
| [173] | Reticular chemistry in action: A hydrolytically stable MOF capturing twice its weight in adsorbed water                                                                          | DOI: 10.1016/j.chempr.2017.11.005  | Sk Md Towsif Abtab   | 2018 |
| [174] | A fine-tuned metal-organic framework for autonomous indoor moisture control                                                                                                      | DOI: 10.1021/jacs.7b04132          | Rasha G. AbdulHalim  | 2017 |
| [175] | Wide Control of Proton Conductivity in Porous Coordination Polymers                                                                                                              | DOI: 10.1021/ja109810w             | Akihito Shigematsu   | 2011 |
| [176] | Structure-property relationships of water adsorption in metal-organic frameworks                                                                                                 | DOI: 10.1039/C4NJ00076E            | Je'ro'me Canivet     | 2014 |
| [177] | Hydrolytically stable fluorinated metal-organic frameworks for energy-efficient dehydration                                                                                      | DOI: 10.1126/science.aam8310       | Amandine Cadiou,     | 2017 |
| [178] | Metal-organic frameworks with high working capacities and cyclic hydrothermal stabilities for fresh water production                                                             | DOI: 10.1016/j.ccej.2015.10.098    | Seung-Ik Kim         | 2016 |
| [179] | Highly porous and stable coordination polymers as water sorption materials                                                                                                       | DOI: 10.1246/cl.2010.360           | George Akiyama       | 2010 |
| [180] | Water stabilization of Zr 6-based metal-organic frameworks via solvent-assisted ligand incorporation                                                                             | DOI: 10.1039/C5SC01784J            | Pravas Deria         | 2015 |
| [181] | Water adsorption/desorption over metal-organic frameworks with ammonium group for possible application in adsorption heat transformation                                         | DOI: 10.1016/j.ccej.2019.05.121    | Hyung Jun An         | 2019 |
| [182] | Ligand rigidification for enhancing the stability of metal-organic frameworks                                                                                                    | DOI: 10.1021/jacs.9b02947          | Xiu-Liang Lv         | 2019 |
| [183] | Tailoring the water adsorption properties of MIL-101 metal-organic frameworks by partial functionalization                                                                       | DOI: 10.1039/C4TA04907A            | Nakeun Ko            | 2015 |
| [184] | Precise control of pore hydrophilicity enabled by post-synthetic cation exchange in metal-organic frameworks                                                                     | DOI: 10.1039/C8SC00112J            | Ashley M. Wright     | 2018 |
| [185] | Perfluoroalkane Functionalization of NU-1000 via Solvent-Assisted Ligand Incorporation: Synthesis and CO2 Adsorption Studies                                                     | DOI: 10.1021/ja408959g             | Pravas Deria         | 2013 |
| [186] | Pore-engineered metal-organic frameworks with excellent adsorption of water and fluorocarbon refrigerant for cooling applications                                                | DOI: 10.1021/jacs.7b04872          | Jian Zheng           | 2017 |
| [187] | Experimental investigation of metal organic frameworks characteristics for water adsorption chillers                                                                             | DOI: 10.1177/0954406212456469      | Ahmed Rezk           | 2013 |
| [188] | A Tunable Bimetallic MOF-74 for Adsorption Chiller Applications                                                                                                                  | DOI: 10.1002/ejic.201800042        | Jian Liu             | 2018 |
| [189] | Controlled modification of the inorganic and organic bricks in an Al-based MOF by direct and post-synthetic synthesis routes                                                     | DOI: 10.1039/C2CE06620C            | Tim Ahnfeldt         | 2012 |
| [190] | Zr (IV) and Hf (IV) based metal-organic frameworks with reo-topology                                                                                                             | DOI: 10.1039/C2CC34246D            | Volodymyr Bon        | 2012 |
| [191] | CAU-3: A new family of porous MOFs with a novel Al-based brick:[Al 2 (OCH 3) 4 (O 2 CX-CO 2)](X= aryl)                                                                           | DOI: 10.1039/C2DT12005D            | Helge Reinsch        | 2012 |
| [192] | Impact of alkyl-functionalized BTC on properties of copper-based metal-organic frameworks                                                                                        | DOI: 10.1021/cg300518k             | Yang Cai             | 2012 |
| [193] | Tuning the adsorption properties of UiO-66 via ligand functionalization                                                                                                          | DOI: 10.1021/la3035352             | Gregory E. Cmarik    | 2012 |
| [194] | Evaluation of the highly stable metal-organic framework MIL-53(Al)-TDC (TDC = 2,5-thiophenedicarboxylate) as a new and promising adsorbent for heat transformation applications  | DOI: 10.1039/C8TA04407D            | Niels Tannert        | 2018 |
| [195] | Tunable Metal-Organic Frameworks Enable High-Efficiency Cascaded Adsorption Heat Pumps                                                                                           | DOI: 10.1021/jacs.8b09655          | Adam J. Rieth        | 2018 |
| [196] | Kinetic water stability of an isostructural family of zinc-based pillared metal-organic frameworks                                                                               | DOI: 10.1021/la304204k             | Himanshu Jasuja      | 2013 |
| [197] | Pore Surface Tailored SOD-Type Metal-Organic Zeolites                                                                                                                            | DOI: 10.1002/adma.201004028        | Jie-Peng Zhang ,     | 2011 |
| [198] | MOF/polymer composite synthesized using a double solvent method offers enhanced water and CO 2 adsorption properties                                                             | DOI: 10.1039/C8CC05428B            | Li Peng              | 2018 |
| [199] | Enhancing the Water Stability of Al-MIL-101-NH2 via Postsynthetic Modification                                                                                                   | DOI: 10.1002/chem.201404654        | Thomas Wittmann      | 2014 |
| [200] | Functionalization of Zr-based MOFs with alkyl and perfluoroalkyl groups: the effect on the water sorption behavior                                                               | DOI: 10.1039/C5SDT02908B           | C. Yu                | 2015 |
| [201] | Synthesis of cobalt-, nickel-, copper-, and zinc-based, water-stable, pillared metal-organic frameworks                                                                          | DOI: 10.1021/la503269f             | Himanshu Jasuja      | 2014 |
| [202] | New Functionalized Flexible Al-MIL-53-X (X = -Cl, -Br, -CH3, -NO2, -(OH)2) Solids: Syntheses, Characterization, Sorption, and Breathing Behavior                                 | DOI: 10.1021/ic201219g             | Shyam Biswas         | 2011 |

|       |                                                                                                                                                                                                              |                                      |                            |      |
|-------|--------------------------------------------------------------------------------------------------------------------------------------------------------------------------------------------------------------|--------------------------------------|----------------------------|------|
| [203] | A new Al-MOF based on a unique column-shaped inorganic building unit exhibiting strongly hydrophilic sorption behaviour                                                                                      | DOI: 10.1039/C2CC34909D              | Helge Reinsch              | 2012 |
| [204] | Single-crystal and humidity-controlled powder diffraction study of the breathing effect in a metal-organic framework upon water adsorption/desorption                                                        | DOI: 10.1039/C6CC02908F              | Javier Ariñez-Soriano      | 2016 |
| [205] | Crystals for sustainability-structuring Al-based MOFs for the allocation of heat and cold                                                                                                                    | DOI: 10.1039/C4CE01073F              | M. F. de Lange             | 2015 |
| [206] | Variable water adsorption in amino acid derivative based homochiral metal organic frameworks                                                                                                                 | DOI: 10.1021/cg3008443               | Tanay Kundu                | 2012 |
| [207] | Rational Tuning of Water Vapor and CO <sub>2</sub> Adsorption in Highly Stable Zr-Based MOFs                                                                                                                 | DOI: 10.1021/jp308657x               | Himanshu Jasuja            | 2012 |
| [208] | Synthesis, Water Adsorption, and Proton Conductivity of Solid-Solution-Type Metal-Organic Frameworks Al(OH)(bdc-OH) <sub>x</sub> (bdc-NH <sub>2</sub> ) <sub>1-x</sub>                                       | DOI: 10.1002/asia.201301673          | Tepei Yamada               | 2014 |
| [209] | Alcohol and water adsorption in zeolitic imidazolate frameworks                                                                                                                                              | DOI: 10.1039/C3CC39116G              | Ke Zhang                   | 2013 |
| [210] | Water stable triazolyl phosphonate MOFs: steep water uptake and facile regeneration                                                                                                                          | DOI: 10.1039/C5DT02651B              | S. Begum                   | 2015 |
| [211] | MOFs as adsorbents for low temperature heating and cooling applications                                                                                                                                      | DOI: 10.1021/ja808444z               | Stefan K. Henninger        | 2009 |
| [212] | Structural stability of BTTB-based metal-organic frameworks under humid conditions                                                                                                                           | DOI: 10.1039/C4TA01372G              | Jagadeswara R. Karra       | 2015 |
| [213] | Water vapor sorption in hybrid pillared square grid materials                                                                                                                                                | DOI: 10.1021/jacs.7b01682            | Daniel O'Nolan             | 2017 |
| [214] | Relating pore hydrophilicity with vapour adsorption capacity in a series of amino acid based metal organic frameworks                                                                                        | DOI: 10.1039/C3CE41083H              | Tanay Kundu                | 2013 |
| [215] | Systematic ligand modulation enhances the moisture stability and gas sorption characteristics of quaternary metal-organic frameworks                                                                         | DOI: 10.1021/jacs.5b00365            | Lujia Liu                  | 2015 |
| [216] | Tailoring of network dimensionality and porosity adjustment in Zr- and Hf-based MOFs                                                                                                                         | DOI: 10.1039/C3CE41121D              | Volodymyr Bon              | 2013 |
| [217] | MIL-91(Ti), a small pore metal-organic framework which fulfils several criteria: an upscaled green synthesis, excellent water stability, high CO <sub>2</sub> selectivity and fast CO <sub>2</sub> transport | DOI: 10.1039/C5TA09349J              | Virginie Benoit            | 2016 |
| [218] | Sorption and breathing properties of difluorinated MIL-47 and Al-MIL-53 frameworks                                                                                                                           | DOI: 10.1016/j.micromeso.2013.07.030 | Shyam Biswas               | 2013 |
| [219] | A soft copper (II) porous coordination polymer with unprecedented aqua bridge and selective adsorption properties                                                                                            | DOI: 10.1002/chem.201201820          | Elsa Quartapelle Procopio, | 2012 |
| [220] | Single- and double-layer structures and sorption properties of two microporous metal-organic frameworks with flexible tritopic ligand                                                                        | DOI: 10.1021/cg301559s               | Liqin Han                  | 2013 |
| [221] | Study of hydrothermal stability and water sorption characteristics of 3-dimensional Zn-based trimesate                                                                                                       | DOI: 10.1021/jp4036327               | Tadeja Birsa Čelic         | 2013 |
| [222] | Dynamic porous metal-organic frameworks: synthesis, structure and sorption property                                                                                                                          | DOI: 10.1039/C2CE26533H              | Chao Hou                   | 2012 |
| [223] | Partially fluorinated MIL-47 and Al-MIL-53 frameworks: influence of functionalization on sorption and breathing properties                                                                                   | DOI: 10.1039/C3CP44204G              | Shyam Biswas               | 2013 |
| [224] | Hydrolytic stability in hemilabile metal-organic frameworks                                                                                                                                                  | DOI: 10.1038/s41557-018-0104-x       | Lauren N. McHugh           | 2018 |
| [225] | A porous framework polymer based on a Zinc (II) 4, 4'-bipyridine-2, 6, 2', 6'-tetracarboxylate: Synthesis, structure, and "zeolite-like" behaviors                                                           | DOI: 10.1021/ja060946u               | Xiang Lin                  | 2006 |
| [226] | Nanochannels of two distinct cross-sections in a porous Al-based coordination polymer                                                                                                                        | 10.1021/ja802589u                    | Angiolina Comotti,         | 2008 |
| [227] | Salt metathesis in three dimensional metal-organic frameworks (MOFs) with unprecedented hydrolytic regenerability                                                                                            | DOI: 10.1039/C3CC41842A              | Tanay Kundu                | 2013 |
| [228] | Solution mediated phase transformation (RHO to SOD) in porous Co-imidazolate based zeolitic frameworks with high water stability                                                                             | DOI: 10.1039/C2CC36651G              | Bishnu P. Biswal           | 2012 |
| [229] | Porous metal-organic frameworks with high stability and selective sorption for CO <sub>2</sub> over N <sub>2</sub>                                                                                           | DOI: 10.1016/j.micromeso.2013.01.020 | Chao Hou                   | 2013 |
| [230] | A microporous metal-organic framework with high stability for GC separation of alcohols from water                                                                                                           | DOI: 10.1039/C2CC33023G              | Tsolmon Borjigin           | 2012 |
| [231] | Porous high-valence metal-organic framework featuring open coordination sites for effective water adsorption                                                                                                 | DOI: 10.1021/acs.inorgchem.8b03042   | Cong Wang                  | 2019 |
| [232] | Third-generation breathing metal-organic framework with selective, stepwise, reversible, and hysteretic adsorption properties                                                                                | DOI: 10.1021/ic402095u               | Suresh Sanda               | 2013 |
| [233] | Highly Water-Stable Lanthanide-Oxalate MOFs with Remarkable Proton Conductivity and Tunable Luminescence                                                                                                     | DOI: 10.1002/adma.201701804          | Kun Zhang                  | 2017 |
| [234] | Modulation of Water Vapor Sorption by a Fourth-Generation Metal-Organic Material with a Rigid Framework and Self-Switching Pores                                                                             | DOI: 10.1021/jacs.8b07290            | Shi-Yuan Zhang             | 2018 |
| [235] | Selective separation of water, methanol, and ethanol by a porous coordination polymer built with a flexible tetrahedral ligand                                                                               | DOI: 10.1021/ja306401j               | Akihito Shigematsu         | 2012 |
| [236] | Highly selective water adsorption in a lanthanum metal-organic framework                                                                                                                                     | DOI: 10.1002/chem.201403241          | Raoul Plessius             | 2014 |
| [237] | Multiple Functions of Gas Separation and Vapor Adsorption in a New MOF with Open Tubular Channels                                                                                                            | DOI: 10.1021/acsami.0c21554          | Yong-Zhi Li                | 2021 |
| [238] | A Hydrolytically Stable Vanadium(IV) Metal-Organic Framework with Photocatalytic Bacteriostatic Activity for Autonomous Indoor Humidity Control                                                              | DOI: 10.1002/anie.201914762          | Dou Ma                     | 2020 |
| [239] | Collective Breathing in an Eightfold Interpenetrated Metal-Organic Framework: From Mechanistic Understanding towards Threshold Sensing Architectures                                                         | DOI: 10.1002/ange.201914198          | Kornel Roztocki            | 2020 |
| [240] | Rational design of a robust aluminum metal-organic framework for multi-purpose water-sorption-driven heat allocations                                                                                        | DOI: 10.1038/s41467-020-18968-7      | Kyung Ho Cho               | 2020 |
| [241] | Nanoporous Water-Stable Zr-Based Metal-Organic Frameworks for Water Adsorption                                                                                                                               | DOI: 10.1021/acsanm.1c00638          | Lifeng Yang                | 2021 |
| [242] | Defective Zr-Fumarate MOFs Enable High-Efficiency Adsorption Heat Allocations                                                                                                                                | DOI: 10.1021/acsami.0c15901          | Kyung Ho Cho               | 2021 |

|       |                                                                                                                                            |                                    |              |      |
|-------|--------------------------------------------------------------------------------------------------------------------------------------------|------------------------------------|--------------|------|
| [243] | Integrated High Water Affinity and Size Exclusion Effect on Robust Cu-Based Metal–Organic Framework for Efficient Ethanol–Water Separation | DOI: 10.1021/acssuschemeng.0c08256 | Lu Wang      | 2021 |
| [244] | A Porous Covalent Organic Framework with Voided Square Grid Topology for Atmospheric Water Harvesting                                      | DOI: 10.1021/jacs.9b13094          | Ha L. Nguyen | 2020 |
| [245] | Functionally graded membranes from nanoporous covalent organic frameworks for highly selective water permeation                            | DOI: 10.1039/C7TA09596A            | Hao Yang     | 2018 |

**Table S2.** The fitting parameters of water adsorption isotherm of 460 adsorbents by universal adsorption isotherm model

| No. | ID No. | Adsorbent                                    | Species | Ref. No. | T_fit (K) | a1       | b1       | c1       | a2       | b2       | c2       | a3       | b3       | c3       | Wsat (g/g) | chi-square | reduced chi-square |
|-----|--------|----------------------------------------------|---------|----------|-----------|----------|----------|----------|----------|----------|----------|----------|----------|----------|------------|------------|--------------------|
| 1   | M-1    | [(Ni(L6)2]4H2O)n                             | MOF     | [229]    | 298       | 0.510662 | 5234.837 | 270.0865 | 0.489338 | 4257.473 | 1298.778 | 0        | 1        | 1        | 0.118849   | 0.01615301 | 4.75E-04           |
| 2   | M-2    | (H2dab)[Zn2(ox)3]                            | MOF     | [71]     | 298       | 0.306957 | 8766.317 | 1603.352 | 0.049921 | 86008.91 | 232.158  | 0.643123 | 808.8088 | 92.00176 | 0.234775   | 0.01123785 | 2.74E-04           |
| 3   | M-3    | [Zn(L)(H2O)2](NO3)2*2H2O)n                   | MOF     | [4]      | 298       | 0.52882  | 626.3419 | 279.071  | 0.150542 | 4965.846 | 1028.225 | 0.320638 | 2227.108 | 174.7954 | 0.108096   | 0.00890053 | 5.24E-04           |
| 4   | M-4    | [Cd(L'1)(Cl)](H2O)                           | MOF     | [206]    | 298       | 0.23332  | 894.2387 | 458.8756 | 0.76668  | 349.8843 | 14.82106 | 0        | 1        | 1        | 0.408752   | 0.03237045 | 0.00231218         |
| 5   | M-5    | [Cd(L'2)(Cl)](H2O)                           | MOF     | [206]    | 298       | 0.653642 | 4820.121 | 1504.807 | 0.346358 | 5435.722 | 510.5705 | 0        | 1        | 1        | 0.09618    | 0.01682548 | 9.90E-04           |
| 6   | M-6    | [Cd(L'2)(Br)2](H2O)3                         | MOF     | [206]    | 298       | 0.51479  | 849.6784 | 439.9004 | 0.48521  | 5625.533 | 1452.515 | 0        | 1        | 1        | 0.033113   | 0.01692648 | 0.00130204         |
| 7   | M-7    | [Cd(L'3)(Cl)](H2O)2                          | MOF     | [206]    | 298       | 0.486496 | 3741.888 | 2280.979 | 0.513504 | 4772.443 | 75.20946 | 0        | 1        | 1        | 0.104072   | 0.02426504 | 0.00202209         |
| 8   | M-8    | [Cd(mpto)2.CH3CH2OH]n                        | MOF     | [24]     | 298       | 0.856283 | 1144.64  | 454.4525 | 0.143717 | 12466.96 | 3158.51  | 0        | 1        | 1        | 0.00313    | 0.01715695 | 9.53E-04           |
| 9   | M-9    | [Co(L)(PIN)]dioxane                          | MOF     | [222]    | 298       | 0.504974 | 1299.791 | 723.4581 | 0.431863 | 2064.6   | 78.72741 | 0.063163 | 6285.649 | 1445.445 | 0.173416   | 0.02700116 | 0.00150006         |
| 10  | M-10   | [Co2(BDC)2(BPNO)]*H2BDC*2MeOH                | MOF     | [19]     | 298       | 0.500489 | 2285.762 | 1094.925 | 0.499511 | 11358.58 | 1681.481 | 0        | 1        | 1        | 0.08074    | 0.01231925 | 8.80E-04           |
| 11  | M-11   | [Co3(ndc)-(HCOO)3(mu3-OH)(H2O)]n             | MOF     | [15]     | 298       | 0.821781 | 3773.782 | 1411.814 | 0.178219 | 4302.689 | 92.83301 | 0        | 1        | 1        | 0.241479   | 0.01060292 | 0.0011781          |
| 12  | M-12   | [Co4L3(u3-OH)(H2O)3](SO4)0.5                 | MOF     | [210]    | 298       | 0.457018 | 4467.489 | 2219.253 | 0.542982 | 5982.605 | 59.36753 | 0        | 1        | 1        | 0.19396    | 0.0144575  | 0.00103268         |
| 13  | M-13   | [Cu(INA)2(NH3)2(H2O)2]                       | MOF     | [36]     | 298       | 0.519577 | 626.1485 | 284.1374 | 0.480423 | 3819.02  | 1462.802 | 0        | 1        | 1        | 0.02194    | 0.01485276 | 0.00123773         |
| 14  | M-14   | [Cu(INA)2]                                   | MOF     | [36]     | 298       | 0.520865 | 1277.909 | 402.0382 | 0.479135 | 4331.69  | 1731.428 | 0        | 1        | 1        | 0.066653   | 0.00560449 | 4.67E-04           |
| 15  | M-15   | [Cu(INAIP)]*2H2O                             | MOF     | [93]     | 298       | 0.503767 | 6593.571 | 221.4058 | 0.496233 | 6833.148 | 1840.676 | 0        | 1        | 1        | 0.133666   | 0.00721822 | 6.56E-04           |
| 16  | M-16   | [Cu2(H2btp)(H2O)2(12-bis(4-pyridl)ethylene)] | MOF     | [115]    | 303       | 0.526565 | 1906.299 | 800.4013 | 0.473435 | 6631.287 | 1498.19  | 0        | 1        | 1        | 0.091301   | 0.00767242 | 2.84E-04           |
| 17  | M-17   | [Cu2(H2btp)(H2O)2(13-bis(4-pyridl)propane)]  | MOF     | [115]    | 303       | 0.530884 | 2336.677 | 966.9342 | 0.469116 | 6735.408 | 1482.661 | 0        | 1        | 1        | 0.068456   | 0.0074342  | 7.43E-04           |
| 18  | M-18   | [Cu2(H2btp)(H2O)2(bipyridine)]               | MOF     | [115]    | 303       | 0.506145 | 2900.827 | 1029.683 | 0.493855 | 5786.118 | 1569.181 | 0        | 1        | 1        | 0.046108   | 0.0072867  | 2.91E-04           |
| 19  | M-19   | [Cu2(pzdc)2(pyz)]*2H2O                       | MOF     | [30]     | 303       | 0.969259 | 4226.324 | 2810.954 | 0.209982 | 10597.37 | 28.83339 | 0        | 1        | 1        | 0.144907   | 0.02906739 | 0.00581348         |
| 20  | M-20   | [La3L4(H2O)6]-Cl                             | MOF     | [210]    | 298       | 0.570808 | 3404.587 | 30.17457 | 0.429192 | 3995.195 | 2684.724 | 0        | 1        | 1        | 0.27352    | 0.01959506 | 0.00103132         |
| 21  | M-21   | [Mn(mpto)2.CH3CH2OH]2                        | MOF     | [24]     | 298       | 0.522038 | 1549.688 | 232.4576 | 0.477962 | 2187.135 | 599.34   | 0        | 1        | 1        | 0.053901   | 0.00162296 | 1.01E-04           |
| 22  | M-22   | [Ni(dipn)]2[Ni(dipn)(H2O)][Fe(CN)6]2.2H2O    | MOF     | [67]     | 298       | 0.523824 | 961.6951 | 469.8777 | 0.476176 | 5895.676 | 1873.033 | 0        | 1        | 1        | 0.196248   | 0.02129363 | 7.89E-04           |
| 23  | M-23   | [Ni(pca)(bdc)0.5(H2O)2]                      | MOF     | [59]     | 298       | 0.496969 | 1161.827 | 434.6495 | 0.503031 | 4663.914 | 2023.556 | 0        | 1        | 1        | 0.158619   | 0.01961132 | 0.00108952         |
| 24  | M-24   | [Ni8(L5)6]                                   | MOF     | [6]      | 298       | 0.153115 | 338.3301 | 2140.756 | 0.846885 | 868.308  | 109.3566 | 0        | 1        | 1        | 1.052699   | 0.00904644 | 7.54E-04           |
| 25  | M-25   | [Ni8(L5-CF3)6]                               | MOF     | [6]      | 298       | 0.93668  | 457.9261 | 60.32911 | 0.06332  | 2919.346 | 1166.59  | 0        | 1        | 1        | 0.857637   | 8.02E-04   | 4.72E-05           |
| 26  | M-26   | [Ni8(L5-CH3)6]                               | MOF     | [107]    | 298       | 0.366774 | 804.6751 | 853.1446 | 0.633226 | 891.7756 | 35.15321 | 0        | 1        | 1        | 0.630968   | 0.02119443 | 7.85E-04           |
| 27  | M-27   | [PbL2]*2DMF*6H2O                             | MOF     | [99]     | 298       | 0.499445 | 431.3161 | 100.718  | 0.330314 | 4031.836 | 1819.959 | 0.170242 | 1236.091 | 11.16846 | 0.215335   | 0.00783151 | 0.00130525         |
| 28  | M-28   | [PbL2]*DMF*2H2O                              | MOF     | [99]     | 298       | 0.455572 | 1675.621 | 762.8275 | 0.157796 | 9482.9   | 27.94876 | 0.386632 | 8758.604 | 658.7146 | 0.048438   | 0.00981114 | 0.00163519         |
| 29  | M-29   | [Zn(NO2-BDC)(dmbpy).5](C2H6O)(H2O)           | MOF     | [48]     | 298       | 0.558257 | 1596.695 | 448.4559 | 0.276337 | 1872.877 | 1050.049 | 0.165406 | 1960.921 | 30.96552 | 0.169732   | 0.02116387 | 8.47E-04           |
| 30  | M-30   | [Zn2(ip)2(bpy)2]*DMF)n                       | MOF     | [88]     | 298       | 0.504148 | 2996.081 | 161.3552 | 0.374465 | 5613.251 | 1623.944 | 0.121387 | 4307.901 | 94.6146  | 0.042329   | 0.01508728 | 0.00301746         |
| 31  | M-31   | [Zn3(TCPB)2*2H2O]*2H2O*4DMF                  | MOF     | [10]     | 298       | 0.483444 | 3179.553 | 1151.034 | 0.243495 | 580.1572 | 201.7043 | 0.273061 | 5453.091 | 17.87949 | 0.104953   | 0.00387811 | 5.54E-04           |
| 32  | M-32   | [Zn4O(micapz)3]n on [Zn4O(dmcapz)3]n         | MOF     | [1]      | 298       | 0.804632 | 698.7384 | 175.8002 | 0.195368 | 2478.516 | 567.755  | 0        | 1        | 1        | 0.13255    | 0.00197556 | 3.29E-04           |
| 33  | M-33   | {(H2PIP)0.5[VO(CEP)]*H2O}                    | MOF     | [57]     | 298       | 0.503332 | 2896.618 | 811.8085 | 0.496668 | 3484.221 | 79.21435 | 0        | 1        | 1        | 0.060483   | 0.0030137  | 3.35E-04           |
| 34  | M-34   | {[Cu(azpy)(glut)](H2O)2}                     | MOF     | [51]     | 298       | 0.566442 | 3077.898 | 107.2347 | 0.256673 | 3030.451 | 960.1884 | 0.176886 | 376.1818 | 50.48967 | 0.165398   | 0.01478491 | 0.00164277         |
| 35  | M-35   | {[Cu2(4-pmpmd)2(CH3OH)4(opd)2]*2H2O}         | MOF     | [53]     | 298       | 0.330916 | 248.803  | 44.55468 | 0.669084 | 2450.532 | 460.1328 | 0        | 1        | 1        | 0.224113   | 0.01444006 | 0.00144401         |



|    |      |                                              |     |       |     |          |          |          |          |          |          |          |          |          |          |            |            |
|----|------|----------------------------------------------|-----|-------|-----|----------|----------|----------|----------|----------|----------|----------|----------|----------|----------|------------|------------|
| 36 | M-36 | {[Cu2(pzdc)2(bpy)]*4H2O}                     | MOF | [30]  | 303 | 0.500825 | 5064.406 | 1742.309 | 0.041599 | 45100.44 | 110.4454 | 0.457577 | 8888.133 | 603.8811 | 0.167213 | 0.00381672 | 4.24E-04   |
| 37 | M-37 | {[Cu4(OH)2(tec)2-(bpy)2]·11H2O}              | MOF | [127] | 298 | 0.330531 | 1082.349 | 306.7249 | 0.669469 | 4115.438 | 1159.243 | 0        | 1        | 1        | 0.08087  | 0.00661317 | 8.27E-04   |
| 38 | M-38 | {[Dy(ox)(Bpybc)(H2O)]*OH*13H2O}n             | MOF | [103] | 298 | 0.503903 | 1201.382 | 187.0009 | 0.496097 | 4107.045 | 1445.385 | 0        | 1        | 1        | 0.238927 | 0.00966116 | 0.00107346 |
| 39 | M-39 | {[Ni(bpe)2(N(CN)2)](N(CN)2)}n                | MOF | [87]  | 298 | 0.377542 | 811.145  | 238.2205 | 0.622458 | 4343.966 | 1760.858 | 0        | 1        | 1        | 0.077416 | 0.03856806 | 8.38E-04   |
| 40 | M-40 | {[Zn-(C10H2O8)0.5(C10S2N2H8)]*5H2O}n         | MOF | [61]  | 298 | 0.455391 | 1382.875 | 509.8604 | 0.544609 | 7415.456 | 399.4682 | 0        | 1        | 1        | 0.08575  | 0.01013948 | 7.80E-04   |
| 41 | M-41 | {[Zn(oxo-pba)2(bpy)]4H2O}n                   | MOF | [117] | 298 | 0.637025 | 684.3635 | 160.378  | 0.362975 | 4842.724 | 2068.992 | 0        | 1        | 1        | 0.077068 | 0.02040387 | 0.00136026 |
| 42 | M-42 | {[Zn2(bpdc)2(azpy)]*2H2O*2DMF}n              | MOF | [62]  | 298 | 0.314243 | 4533.593 | 1551.743 | 0.685757 | 1087.168 | 369.6797 | 0        | 1        | 1        | 0.080016 | 0.00862457 | 6.63E-04   |
| 43 | M-43 | {[Zn2(bpdc)2(azpy)]*2H2O*2DMF}n Nanoscale    | MOF | [62]  | 298 | 0.477293 | 969.86   | 415.0624 | 0.522707 | 4705.219 | 1861.323 | 0        | 1        | 1        | 0.096342 | 0.01848627 | 0.00168057 |
| 44 | M-44 | {[Zn3(bpdc)3(azpy)]*4H2O*2DEF}n              | MOF | [62]  | 298 | 0.452338 | 482.8178 | 81.43422 | 0.547662 | 3632.904 | 1693.692 | 0        | 1        | 1        | 0.111684 | 0.02216496 | 0.001705   |
| 45 | M-45 | {[Zn4O(bfbpdc)3-(bpy)0.5(H2O)]*(3DMF)(H2O)}n | MOF | [60]  | 298 | 0.029183 | 869.2451 | 224.5988 | 0.970817 | 276.6266 | 20.43725 | 0        | 1        | 1        | 0.407887 | 0.00108437 | 8.34E-05   |
| 46 | M-46 | {[ZnL(HCO2)(H2O)]*DMF}                       | MOF | [109] | 298 | 0.659379 | 1761.468 | 378.391  | 0.198253 | 4444.955 | 3335.9   | 0.142368 | 2029.932 | 35.62504 | 0.470142 | 0.00817563 | 6.81E-04   |
| 47 | M-47 | 1 C76H116N14O42Zn3                           | MOF | [118] | 298 | 0.501983 | 867.3542 | 472.6359 | 0.026441 | 3765.455 | 63.39667 | 0.471576 | 5001.142 | 1714.793 | 0.168687 | 0.02524824 | 7.21E-04   |
| 48 | M-48 | 13R(Co)                                      | MOF | [234] | 298 | 0.640873 | 932.4805 | 289.5853 | 0.359127 | 3635.083 | 1114.012 | 0        | 1        | 1        | 0.015587 | 0.00949731 | 6.78E-04   |
| 49 | M-49 | 1-LiCl                                       | MOF | [112] | 298 | 0.607952 | 3437.951 | 649.652  | 0.203173 | 6897.542 | 40.74488 | 0.188875 | 4886.074 | 6.52728  | 0.229565 | 0.01639451 | 0.00409863 |
| 50 | M-50 | 23R(Co)                                      | MOF | [234] | 298 | 0.79326  | 505.7056 | 69.95749 | 0.20674  | 1895.939 | 692.9192 | 0        | 1        | 1        | 0.052796 | 0.01000746 | 5.56E-04   |
| 51 | M-51 | 2D [Cu(bpy)2(OTf)2]n                         | MOF | [70]  | 303 | 0.672567 | 4696.213 | 954.583  | 0.021929 | 166112.3 | 233.4801 | 0.305504 | 528.2632 | 42.9281  | 0.177634 | 0.00331925 | 2.77E-04   |
| 52 | M-52 | 33R(Co)                                      | MOF | [234] | 298 | 0.560974 | 1340.934 | 68.54631 | 0.439026 | 2710.92  | 922.7126 | 0        | 1        | 1        | 0.041072 | 0.00556062 | 3.48E-04   |
| 53 | M-53 | 3S(Co)                                       | MOF | [234] | 298 | 0.624739 | 936.7449 | 111.9363 | 0.375261 | 2346.342 | 1001.279 | 0        | 1        | 1        | 0.027462 | 0.00840965 | 5.26E-04   |
| 54 | M-54 | 43R(Co)                                      | MOF | [234] | 298 | 0.427069 | 3334.722 | 1131.89  | 0.572931 | 997.1203 | 326.9824 | 0        | 1        | 1        | 0.019246 | 0.01555107 | 0.00111079 |
| 55 | M-55 | Al(OH)-(1,4-NDC)                             | MOF | [226] | 298 | 0.372883 | 1775.189 | 721.4617 | 0.627117 | 1870.424 | 62.05933 | 0        | 1        | 1        | 0.158218 | 0.00397948 | 2.21E-04   |
| 56 | M-56 | AlaZnBr                                      | MOF | [227] | 298 | 0.495244 | 836.3366 | 172.6985 | 0.504756 | 2622.13  | 1000.698 | 0        | 1        | 1        | 0.066466 | 0.01345469 | 0.00103498 |
| 57 | M-57 | AlaZnCl                                      | MOF | [227] | 298 | 0.499809 | 560.6638 | 170.0564 | 0.500191 | 4465.553 | 824.8671 | 0        | 1        | 1        | 0.159732 | 0.01195512 | 8.54E-04   |
| 58 | M-58 | AlaZnOAc                                     | MOF | [214] | 298 | 0.501634 | 312.99   | 49.70892 | 0.196867 | 6745.649 | 2434.339 | 0.301499 | 263.5642 | 10.13563 | 0.280444 | 0.01355115 | 7.97E-04   |
| 59 | M-59 | ALFFIVE-1-Ni                                 | MOF | [177] | 308 | 0.179548 | 3427.491 | 1949.645 | 0.820452 | 9870.539 | 294.1314 | 0        | 1        | 1        | 0.233664 | 0.03279483 | 0.00182193 |
| 60 | M-60 | Aluminum fumarate                            | MOF | [126] | 288 | 0.506178 | 3856.701 | 867.6701 | 0.408293 | 4585.964 | 59.43055 | 0.08553  | 9470.881 | 1251.102 | 0.440096 | 0.00951903 | 0.00105767 |
| 61 | M-61 | Basolite™ F300(Fe)                           | MOF | [187] | 293 | 0.702736 | 2928.745 | 523.2538 | 0.297264 | 5287.008 | 2382.407 | 0        | 1        | 1        | 0.375685 | 0.00460621 | 3.84E-04   |
| 62 | M-62 | BIT-66(V)                                    | MOF | [238] | 298 | 0.748827 | 1250.022 | 42.72423 | 0.047293 | 97683.99 | 173.3818 | 0.20388  | 129.3036 | 10.84913 | 0.704999 | 0.02030529 | 8.83E-04   |
| 63 | M-63 | BIT-72(Al)                                   | MOF | [164] | 283 | 0.640122 | 1237.503 | 919.3266 | 0.359878 | 1609.403 | 34.93199 | 0        | 1        | 1        | 0.52676  | 0.02783257 | 0.00309251 |
| 64 | M-64 | BIT-73(Al)                                   | MOF | [164] | 283 | 0.473024 | 1134.681 | 756.595  | 0.526976 | 1620.782 | 35.66584 | 0        | 1        | 1        | 0.467809 | 0.01229347 | 0.00136594 |
| 65 | M-65 | BIT-74(Al)                                   | MOF | [164] | 283 | 0.489695 | 1380.483 | 738.6405 | 0.011839 | 42449.02 | 59.62863 | 0.498467 | 2261.408 | 79.89422 | 0.577498 | 0.01352542 | 0.00270508 |
| 66 | M-66 | Blucher-101408                               | MOF | [107] | 298 | 0.645251 | 717.158  | 175.8046 | 0.354749 | 556.1822 | 31.91108 | 0        | 1        | 1        | 0.741299 | 0.0020904  | 9.95E-05   |
| 67 | M-67 | Bu-FeCr                                      | MOF | [112] | 298 | 0.518268 | 779.8054 | 307.3632 | 0.481732 | 4052.882 | 1589.797 | 0        | 1        | 1        | 0.043052 | 0.02957144 | 0.00246429 |
| 68 | M-68 | BUT-155(Cu)                                  | MOF | [158] | 298 | 0.345575 | 3250.295 | 136.9656 | 0.654425 | 3854.049 | 1928.157 | 0        | 1        | 1        | 0.42961  | 0.01857296 | 7.14E-04   |
| 69 | M-69 | BUT-46A(Zr)                                  | MOF | [159] | 298 | 0.840141 | 1843.742 | 102.0156 | 0.159859 | 3443.272 | 2124.786 | 0        | 1        | 1        | 0.503352 | 0.00241368 | 1.61E-04   |
| 70 | M-70 | BUT-46B(Zr)                                  | MOF | [159] | 298 | 0.490504 | 1536.385 | 57.83868 | 0.132986 | 2971.123 | 1652.917 | 0.37651  | 1543.975 | 19.95696 | 0.484661 | 0.00249597 | 1.31E-04   |
| 71 | M-71 | BUT-46F(Zr)                                  | MOF | [159] | 298 | 0.287531 | 1983.241 | 753.0703 | 0.712469 | 2139.437 | 64.70286 | 0        | 1        | 1        | 0.574709 | 0.00551788 | 2.90E-04   |
| 72 | M-72 | BUT-46W(Zr)                                  | MOF | [159] | 298 | 0.659375 | 2759.009 | 188.4812 | 0.340625 | 3290.434 | 1755.627 | 0        | 1        | 1        | 0.599538 | 0.01111326 | 5.29E-04   |
| 73 | M-73 | C10H4O12Eu2                                  | MOF | [91]  | 298 | 0.55939  | 2903.706 | 985.3003 | 0.44061  | 7794.129 | 1868.902 | 0        | 1        | 1        | 0.098133 | 0.00544059 | 1.94E-04   |
| 74 | M-74 | C115.5H202N14O43Zn4                          | MOF | [92]  | 298 | 0.536308 | 1109.726 | 435.3952 | 0.463692 | 4798.04  | 1082.293 | 0        | 1        | 1        | 0.088443 | 0.01023167 | 0.00113685 |
| 75 | M-75 | C11H15BrN2O4Zn                               | MOF | [73]  | 298 | 0.501868 | 1511.161 | 491.198  | 0.017552 | 40960.77 | 434.0118 | 0.480581 | 6446.472 | 1545.676 | 0.061531 | 0.00726914 | 3.30E-04   |
| 76 | M-76 | C11H15ClN2O4Zn                               | MOF | [73]  | 298 | 0.615534 | 2081.81  | 120.8613 | 0.384466 | 3292.065 | 1503.1   | 0        | 1        | 1        | 0.133025 | 0.0568803  | 0.00203144 |
| 77 | M-77 | C12H17ClN2O3Cd                               | MOF | [52]  | 303 | 0.273736 | 391.0387 | 96.47974 | 0.120947 | 1543.931 | 525.3683 | 0.605317 | 393.3542 | 10.5173  | 0.419649 | 0.04289651 | 0.00214483 |
| 78 | M-78 | C15H27N2O10Dy                                | MOF | [54]  | 298 | 0.979598 | 5309.281 | 1284.24  | 0.020402 | 116271.6 | 167.3794 | 0        | 1        | 1        | 0.111031 | 0.00604608 | 4.32E-04   |

|     |       |                          |     |       |     |          |          |          |          |          |          |          |          |          |          |            |            |
|-----|-------|--------------------------|-----|-------|-----|----------|----------|----------|----------|----------|----------|----------|----------|----------|----------|------------|------------|
| 79  | M-79  | C15H27N2O10Er            | MOF | [54]  | 298 | 0.9487   | 4501.377 | 1190.851 | 0.0513   | 51123.33 | 72.00131 | 0        | 1        | 1        | 0.149247 | 0.0092179  | 6.58E-04   |
| 80  | M-80  | C15H27N2O10Ho            | MOF | [54]  | 298 | 0.947979 | 5259.546 | 1202.063 | 0.052021 | 13437.33 | 2153.641 | 0        | 1        | 1        | 0.104644 | 7.71E-04   | 5.14E-05   |
| 81  | M-81  | C15H27N2O10Tb            | MOF | [54]  | 298 | 0.517475 | 5236.31  | 889.5998 | 0.482525 | 7913.84  | 1240.819 | 0        | 1        | 1        | 0.104723 | 0.00110943 | 1.58E-04   |
| 82  | M-82  | C15H27N2O10Tm            | MOF | [54]  | 298 | 0.507653 | 2863.366 | 629.0747 | 0.492347 | 5442.666 | 1198.521 | 0        | 1        | 1        | 0.116477 | 0.0012386  | 8.26E-05   |
| 83  | M-83  | C18H21Br2N4O9Cd2         | MOF | [52]  | 303 | 0.405929 | 837.1194 | 336.6141 | 0.594071 | 4843.006 | 1778.07  | 0        | 1        | 1        | 0.03345  | 0.02032987 | 9.24E-04   |
| 84  | M-84  | C24H40N2O16Cl2Cd3        | MOF | [38]  | 298 | 0.822274 | 6225.138 | 1780.069 | 0.177726 | 207.1526 | 79.21355 | 0        | 1        | 1        | 0.087345 | 0.01981637 | 3.20E-04   |
| 85  | M-85  | C26H24Br2Cu2N8O3         | MOF | [102] | 298 | 0.999076 | 9467.483 | 1700.204 | 0.000923 | 16086.43 | 117.1451 | 1.74E-08 | 9624.564 | 71.83435 | 0.075073 | 0.0032134  | 5.36E-04   |
| 86  | M-86  | C28H24CoN10              | MOF | [94]  | 298 | 0.506454 | 524.605  | 153.2857 | 0.493546 | 4093.691 | 2243.338 | 0        | 1        | 1        | 0.076317 | 0.01915821 | 0.00127721 |
| 87  | M-87  | C32H24Cu3N6O12           | MOF | [13]  | 288 | 0.741871 | 4788.26  | 2042.183 | 0.038326 | 130613.5 | 4749.623 | 0.219803 | 5193.839 | 173.7663 | 0.180299 | 0.0244773  | 5.97E-04   |
| 88  | M-88  | C32H46N4O8Zn             | MOF | [101] | 298 | 0.546794 | 1084.812 | 262.3904 | 0.003935 | 8337.619 | 53.52271 | 0.44927  | 4186.954 | 1403.056 | 0.006019 | 0.02217844 | 0.00221784 |
| 89  | M-89  | C4H8HoKO12 Dehydrated    | MOF | [55]  | 298 | 0.535648 | 8553.543 | 526.2685 | 0.464352 | 8536.52  | 2623.427 | 0        | 1        | 1        | 0.187247 | 0.03887798 | 0.00259187 |
| 90  | M-90  | C55H52Fe4N20O18          | MOF | [33]  | 298 | 0.758574 | 5585.69  | 2306.928 | 0.241426 | 9051.161 | 141.4404 | 0        | 1        | 1        | 0.101851 | 0.02953675 | 0.00210977 |
| 91  | M-91  | C62H44N2O8Zn2            | MOF | [58]  | 298 | 0.619108 | 154.4522 | 0.792987 | 0.380892 | 2106.844 | 1003.895 | 0        | 1        | 1        | 0.279552 | 0.00632615 | 3.95E-04   |
| 92  | M-92  | C62H50Cd3K2N2O26         | MOF | [106] | 298 | 0.505015 | 2225.925 | 507.9046 | 0.494985 | 5073.836 | 1281.53  | 0        | 1        | 1        | 0.145102 | 0.01362427 | 4.01E-04   |
| 93  | M-93  | C9H11ClN2O4Cd            | MOF | [52]  | 303 | 0.504267 | 4800.661 | 1920.095 | 0.495733 | 5462.21  | 563.8127 | 0        | 1        | 1        | 0.094969 | 0.04048639 | 0.00119078 |
| 94  | M-94  | CALF-25                  | MOF | [74]  | 298 | 0.647108 | 804.2719 | 283.0545 | 0.352892 | 3973.336 | 1539.357 | 0        | 1        | 1        | 0.072361 | 0.018209   | 0.00121393 |
| 95  | M-95  | CAU-1(AI)-(OH)2          | MOF | [205] | 298 | 0.713448 | 2493.458 | 362.3371 | 0.286552 | 5542.192 | 2724.161 | 0        | 1        | 1        | 0.310129 | 0.00588334 | 2.67E-04   |
| 96  | M-96  | CAU-1(AI)-NH2            | MOF | [189] | 298 | 0.082898 | 3051.135 | 4586.231 | 0.917102 | 1918.052 | 249.4663 | 0        | 1        | 1        | 0.376916 | 0.00506479 | 2.30E-04   |
| 97  | M-97  | CAU-1(AI)-NHCH3          | MOF | [189] | 298 | 0.503736 | 2283.802 | 174.7008 | 0.266861 | 2798.515 | 1502.954 | 0.229403 | 2416.838 | 41.66872 | 0.511945 | 0.0059868  | 3.52E-04   |
| 98  | M-98  | CAU-1(AI)-NHCOCH3        | MOF | [189] | 298 | 0.505685 | 2676.094 | 475.1216 | 0.494315 | 4587.841 | 2164.997 | 0        | 1        | 1        | 0.242911 | 0.00944627 | 4.50E-04   |
| 99  | M-99  | CAU-10-CH3               | MOF | [112] | 298 | 0.606472 | 1639.047 | 371.7382 | 0.151009 | 6239.894 | 1724.632 | 0.242519 | 2014.032 | 24.71852 | 0.180798 | 0.00514792 | 3.03E-04   |
| 100 | M-100 | CAU-10-H                 | MOF | [112] | 298 | 0.374274 | 2911.799 | 1262.177 | 0.350639 | 4243.646 | 5.816306 | 0.275087 | 4499.975 | 6.17744  | 0.379873 | 0.36291498 | 0.0259225  |
| 101 | M-101 | CAU-10-NH2               | MOF | [112] | 298 | 0.501692 | 4082.048 | 784.2965 | 0.498308 | 7757.765 | 2433.145 | 0        | 1        | 1        | 0.226555 | 0.0049774  | 2.07E-04   |
| 102 | M-102 | CAU-10-NO2               | MOF | [112] | 298 | 0.5019   | 2666.301 | 168.1114 | 0.4981   | 3056.374 | 564.6944 | 0        | 1        | 1        | 0.174018 | 0.00713932 | 3.76E-04   |
| 103 | M-103 | CAU-10-OCH3              | MOF | [112] | 298 | 0.293463 | 3724.138 | 1352.805 | 0.706537 | 3330.578 | 33.81504 | 0        | 1        | 1        | 0.087649 | 0.01874362 | 0.00156197 |
| 104 | M-104 | CAU-10-OH                | MOF | [112] | 298 | 0.556738 | 3495.599 | 1781.102 | 0.167066 | 4366.106 | 55.06857 | 0.276196 | 5140.368 | 50.62285 | 0.295798 | 0.02669268 | 8.90E-04   |
| 105 | M-105 | CAU-10-pydc              | MOF | [2]   | 303 | 0.471067 | 5733.005 | 650.6848 | 0.017647 | 10624.48 | 55.69884 | 0.511286 | 5988.54  | 2115.588 | 0.389493 | 0.00562562 | 2.96E-04   |
| 106 | M-106 | CAU-13                   | MOF | [63]  | 298 | 0.546533 | 2663.44  | 1553.063 | 0.453467 | 3868.919 | 61.20036 | 0        | 1        | 1        | 0.137491 | 0.0177353  | 0.00104325 |
| 107 | M-107 | CAU-1-NH2                | MOF | [98]  | 298 | 0.501819 | 2054.022 | 163.3519 | 0.061664 | 5606.069 | 1196.815 | 0.436517 | 1634.777 | 365.8726 | 0.391084 | 0.00214636 | 9.76E-05   |
| 108 | M-108 | CAU-1-NHCH3              | MOF | [98]  | 298 | 0.81102  | 2370.665 | 172.8617 | 0.18898  | 2113.495 | 4194.553 | 0        | 19744.46 | 27.41727 | 0.698689 | 0.02544292 | 8.21E-04   |
| 109 | M-109 | CAU-1-NHCOCH3            | MOF | [98]  | 298 | 0.728752 | 2717.906 | 698.9819 | 0.047404 | 6171.319 | 139.2509 | 0.223843 | 7095.983 | 3347.987 | 0.251244 | 0.00607442 | 2.64E-04   |
| 110 | M-110 | CAU-23                   | MOF | [131] | 298 | 0.745529 | 3212.707 | 55.6809  | 0.254471 | 2219.412 | 1254.928 | 0        | 1        | 1        | 0.407314 | 0.02150413 | 7.42E-04   |
| 111 | M-111 | CAU-3(AI)                | MOF | [191] | 298 | 0.353234 | 1149.786 | 64.45253 | 0.226674 | 2273.881 | 1628.989 | 0.420092 | 1168.05  | 16.05594 | 0.493741 | 0.01008637 | 4.39E-04   |
| 112 | M-112 | CAU-3(AI)-NH2            | MOF | [191] | 298 | 0.687306 | 979.1474 | 88.95147 | 0.312694 | 3199.662 | 1501.351 | 0        | 1        | 1        | 0.521111 | 0.02035233 | 7.54E-04   |
| 113 | M-113 | CAU-6(AI)                | MOF | [203] | 298 | 0.501704 | 11133.89 | 1101.168 | 0.498296 | 2907.121 | 1825.468 | 0        | 1        | 1        | 0.358976 | 0.02086948 | 9.07E-04   |
| 114 | M-114 | CAU-8(AI)                | MOF | [205] | 298 | 0.906368 | 1883.343 | 974.4826 | 0.093632 | 35489.67 | 57.93996 | 0        | 1        | 1        | 0.158484 | 0.05532487 | 0.0032544  |
| 115 | M-115 | Cd (II)-MOF [Cd(L)(DMF)] | MOF | [113] | 298 | 0.521397 | 2364.367 | 1094.986 | 0.478603 | 8172.391 | 1567.734 | 0        | 1        | 1        | 0.141479 | 0.01135994 | 4.37E-04   |
| 116 | M-116 | Cd(BTTB)                 | MOF | [212] | 298 | 0.506559 | 1416.187 | 328.9653 | 0.493441 | 4375.635 | 2191.944 | 0        | 1        | 1        | 0.242902 | 0.01752124 | 0.00109508 |
| 117 | M-117 | Cd2(sdb)2(pcih)2         | MOF | [172] | 298 | 0.509802 | 2727.822 | 1145.908 | 0.490198 | 3845.803 | 233.9403 | 0        | 1        | 1        | 0.178928 | 0.00511331 | 2.43E-04   |
| 118 | M-118 | Cd3L2                    | MOF | [220] | 298 | 0.504193 | 1488.334 | 732.4625 | 0.012049 | 10340.31 | 1496.223 | 0.483758 | 8468.114 | 2818.72  | 0.118513 | 0.02056017 | 0.00158155 |
| 119 | M-119 | CID-3                    | MOF | [90]  | 298 | 0.575182 | 1414.131 | 596.9599 | 0.424818 | 1262.943 | 59.77037 | 0        | 1        | 1        | 0.097375 | 0.01269015 | 7.05E-04   |
| 120 | M-120 | Co(BTTB)(AZPY)           | MOF | [212] | 298 | 0.263347 | 1563.054 | 1312.838 | 0.736653 | 1409.006 | 161.6176 | 0        | 1        | 1        | 0.207404 | 0.01361648 | 9.08E-04   |
| 121 | M-121 | Co(BTTB)(BPY)            | MOF | [212] | 298 | 0.546868 | 433.3997 | 78.92365 | 0.25028  | 2660.979 | 1126.198 | 0.202852 | 675.7011 | 128.4626 | 0.025354 | 0.02480307 | 0.00248031 |

|     |       |                                                                                                                                                       |     |       |     |          |          |          |          |          |          |          |          |          |          |            |            |
|-----|-------|-------------------------------------------------------------------------------------------------------------------------------------------------------|-----|-------|-----|----------|----------|----------|----------|----------|----------|----------|----------|----------|----------|------------|------------|
| 122 | M-122 | Co(BTTB)(DMBPY)                                                                                                                                       | MOF | [201] | 298 | 0.917255 | 427.8484 | 64.20248 | 0.082745 | 2904.861 | 971.7103 | 0        | 1        | 1        | 0.196984 | 0.00981734 | 6.14E-04   |
| 123 | M-123 | Co <sub>2</sub> C12(BTDD)                                                                                                                             | MOF | [132] | 298 | 0.273219 | 4808.701 | 1962.336 | 0.726781 | 3061.117 | 14.96877 | 0        | 1        | 1        | 0.940152 | 0.00961169 | 4.81E-04   |
| 124 | M-124 | Co <sub>2</sub> C12BBTA                                                                                                                               | MOF | [195] | 298 | 0.499194 | 6161.346 | 2294.562 | 0.500806 | 10300.21 | 436.274  | 0        | 1        | 1        | 0.420166 | 0.02148556 | 0.00119364 |
| 125 | M-125 | Cobalt Triazolyl Phosphonate MOF                                                                                                                      | MOF | [116] | 298 | 0.5014   | 6166.038 | 260.8109 | 0.4986   | 4465.786 | 2064.498 | 0        | 1        | 1        | 0.196583 | 0.02107313 | 0.00150522 |
| 126 | M-126 | Cobalt Triazolyl Phosphonate MOF (95%RH)                                                                                                              | MOF | [116] | 298 | 0.432101 | 3951.04  | 2060.999 | 0.102313 | 28273.95 | 39.52983 | 0.465586 | 6068.82  | 76.04365 | 0.245199 | 0.01409047 | 0.00100646 |
| 127 | M-127 | Cobalt Triazolyl Phosphonate MOF (Activated at 403K)                                                                                                  | MOF | [116] | 298 | 0.504975 | 983.1542 | 391.3612 | 0.495025 | 4870.004 | 1307.119 | 0        | 1        | 1        | 0.358866 | 0.02044212 | 7.86E-04   |
| 128 | M-128 | Co-CUK-1                                                                                                                                              | MOF | [130] | 303 | 0.208709 | 3634.849 | 1436.989 | 0.791291 | 5183.317 | 68.01181 | 0        | 1        | 1        | 0.298332 | 0.01365012 | 5.46E-04   |
| 129 | M-129 | Co-MOF-74(M)                                                                                                                                          | MOF | [27]  | 298 | 0.000667 | 4018.014 | 247.3233 | 1.60E-06 | 48202.63 | 67.38384 | 0.999332 | 8789.76  | 1708.746 | 0.766851 | 0.01539949 | 0.00384987 |
| 130 | M-130 | Co-MOF-74(S)                                                                                                                                          | MOF | [27]  | 298 | 0.933003 | 8420.789 | 1283.271 | 0.066997 | 42876.19 | 4.29E+09 | 0        | 15082.77 | 20.61553 | 0.970423 | 0.00941796 | 0.00235449 |
| 131 | M-131 | CoNlm                                                                                                                                                 | MOF | [228] | 293 | 0.467512 | 1400.989 | 186.4208 | 0.532488 | 1746.068 | 1916.384 | 0        | 1        | 1        | 0.135527 | 0.05119941 | 0.00255997 |
| 132 | M-132 | CPO-27-Ni                                                                                                                                             | MOF | [100] | 298 | 0.50284  | 7727.53  | 3311.866 | 0.49716  | 11849.33 | 1588.03  | 0        | 1        | 1        | 0.527958 | 0.02108168 | 5.55E-04   |
| 133 | M-133 | Cr <sub>3</sub> (BTC) <sub>2</sub>                                                                                                                    | MOF | [163] | 298 | 0.504831 | 3705.142 | 649.094  | 0.495169 | 5788.528 | 1386.7   | 0        | 1        | 1        | 0.432001 | 0.00310316 | 2.22E-04   |
| 134 | M-134 | Cr-MIL(101)                                                                                                                                           | MOF | [112] | 298 | 0.341587 | 1982.734 | 68.23827 | 0.542525 | 1491.399 | 123.1261 | 0.115887 | 4689.158 | 626.6896 | 1.339039 | 0.02517602 | 4.84E-04   |
| 135 | M-135 | Cr-MIL-101-NO <sub>2</sub>                                                                                                                            | MOF | [112] | 298 | 0.667705 | 1974.481 | 111.778  | 0.185165 | 2915.03  | 2382.041 | 0.14713  | 1555.775 | 34.49866 | 0.753398 | 0.0546236  | 0.00121386 |
| 136 | M-136 | Cr-soc-MOF-1                                                                                                                                          | MOF | [173] | 298 | 0.502124 | 1073.715 | 105.5002 | 0.482359 | 831.9149 | 59.91381 | 0.015518 | 13171.37 | 36.30194 | 1.929962 | 0.00238872 | 1.59E-04   |
| 137 | M-137 | Cu(mtpm)C12                                                                                                                                           | MOF | [235] | 298 | 0.506227 | 2159.327 | 1042.898 | 0.493773 | 9215.365 | 2549.023 | 0        | 1        | 1        | 0.027911 | 0.01576224 | 9.27E-04   |
| 138 | M-138 | Cu <sub>2</sub> (dmcapz) <sub>2</sub>                                                                                                                 | MOF | [219] | 298 | 0.822334 | 2552.065 | 131.669  | 0.177666 | 5305.265 | 4742.901 | 0        | 1        | 1        | 0.221849 | 0.0102823  | 5.41E-04   |
| 139 | M-139 | Cu <sub>2</sub> (pzdC) <sub>2</sub> bpe                                                                                                               | MOF | [30]  | 303 | 0.766861 | 6530.514 | 2227.074 | 0.233139 | 6986.812 | 142.6348 | 0        | 1        | 1        | 0.210506 | 0.00961237 | 0.00106804 |
| 140 | M-140 | Cu <sub>2</sub> C12BBTA                                                                                                                               | MOF | [195] | 298 | 0.335964 | 2707.957 | 675.0195 | 0.487296 | 9105.138 | 708.516  | 0.17674  | 9541.63  | 14.11635 | 0.341945 | 0.02113923 | 0.00162609 |
| 141 | M-141 | Cu <sub>6</sub> (Trz) <sub>10</sub> (H <sub>2</sub> O) <sub>4</sub> [H <sub>2</sub> SiW <sub>12</sub> O <sub>40</sub> ] <sub>8</sub> H <sub>2</sub> O | MOF | [124] | 298 | 0.369886 | 512.321  | 108.9123 | 0.630114 | 3538.78  | 1073.463 | 0        | 1        | 1        | 0.092745 | 0.00809855 | 5.78E-04   |
| 142 | M-142 | CuBTC                                                                                                                                                 | MOF | [11]  | 298 | 0.675464 | 4814.229 | 1658.316 | 0.1742   | 9456.902 | 49.39552 | 0.150336 | 815.954  | 79.79317 | 0.525288 | 0.00744981 | 2.40E-04   |
| 143 | M-143 | CuEBTC                                                                                                                                                | MOF | [192] | 293 | 0.274882 | 1559.018 | 278.4578 | 0.735876 | 6519.399 | 1372.227 | 0        | 64123.47 | 186.7339 | 0.188646 | 0.00590674 | 5.37E-04   |
| 144 | M-144 | CuMBTC                                                                                                                                                | MOF | [192] | 293 | 0.379367 | 1951.31  | 99.68637 | 0.620633 | 5817.342 | 1963.163 | 0        | 1        | 1        | 0.189056 | 0.00657126 | 5.05E-04   |
| 145 | M-145 | Cu-MOF                                                                                                                                                | MOF | [85]  | 303 | 0.47193  | 10605.24 | 2264.053 | 0.52807  | 15773.37 | 90.22378 | 2.00E-09 | 12837.05 | 73.31952 | 0.06957  | 0.0013389  | 6.69E-04   |
| 146 | M-146 | Cu-Tria                                                                                                                                               | MOF | [243] | 298 | 0.506382 | 10368.86 | 296.7121 | 0.493618 | 7730.738 | 2026.499 | 0        | 1        | 1        | 0.189956 | 0.05699737 | 0.00356234 |
| 147 | M-147 | DETA-MIL-101                                                                                                                                          | MOF | [97]  | 298 | 0.607507 | 1267.653 | 494.3548 | 0.392493 | 8539.519 | 2462.506 | 0        | 1        | 1        | 0.105643 | 0.02090345 | 0.00209035 |
| 148 | M-148 | DMOF                                                                                                                                                  | MOF | [64]  | 298 | 0.503404 | 2839.256 | 535.3779 | 0.496596 | 3306.321 | 178.4745 | 0        | 1        | 1        | 0.094165 | 0.00431072 | 5.39E-04   |
| 149 | M-149 | DMOF(Zn)-A                                                                                                                                            | MOF | [83]  | 298 | 0.928374 | 2940.752 | 318.7314 | 0.071626 | 2236.423 | 1131.182 | 0        | 1        | 1        | 0.292403 | 0.00470859 | 3.62E-04   |
| 150 | M-150 | DMOF(Zn)-Br                                                                                                                                           | MOF | [83]  | 298 | 0.807842 | 2570.243 | 987.6379 | 0.192158 | 7163.595 | 1090.241 | 0        | 1        | 1        | 0.056451 | 0.00918496 | 5.74E-04   |
| 151 | M-151 | DMOF(Zn)-N                                                                                                                                            | MOF | [83]  | 298 | 0.891788 | 3351.314 | 1423.911 | 0.022785 | 46375.13 | 1086.105 | 0.085427 | 11490.24 | 68.77548 | 0.021774 | 0.02082558 | 0.0026032  |
| 152 | M-152 | DMOF(Zn)-NH <sub>3</sub>                                                                                                                              | MOF | [64]  | 298 | 0.508263 | 1341.638 | 377.4531 | 0.491737 | 5547.413 | 1232.355 | 0        | 1        | 1        | 0.112755 | 0.011978   | 0.0011978  |
| 153 | M-153 | DMOF-Cl <sub>2</sub>                                                                                                                                  | MOF | [83]  | 298 | 0.631632 | 2345.277 | 33.17692 | 0.368368 | 2549.349 | 1194.274 | 0        | 1        | 1        | 0.073706 | 0.00420671 | 7.01E-04   |
| 154 | M-154 | DMOF-NO <sub>2</sub>                                                                                                                                  | MOF | [83]  | 298 | 0.633592 | 1947.788 | 129.9575 | 0.366408 | 6801.995 | 2546.332 | 0        | 1        | 1        | 0.129396 | 0.01657255 | 6.91E-04   |
| 155 | M-155 | DMOF-OH                                                                                                                                               | MOF | [83]  | 298 | 0.902182 | 3543.636 | 1301.761 | 0.097818 | 1271.661 | 37.48507 | 0        | 1        | 1        | 0.057282 | 0.00907017 | 0.00151169 |
| 156 | M-156 | DMOF-TM(Co)                                                                                                                                           | MOF | [201] | 298 | 0.090816 | 4021.189 | 1604.002 | 0.909184 | 2569.524 | 182.029  | 0        | 1        | 1        | 0.369453 | 0.00443186 | 3.41E-04   |
| 157 | M-157 | DMOF-TM(Cu)                                                                                                                                           | MOF | [201] | 298 | 0.159965 | 2646.829 | 1066.883 | 0.840035 | 1530.472 | 123.0975 | 0        | 1        | 1        | 0.383207 | 0.00693193 | 4.95E-04   |
| 158 | M-158 | DMOF-TM(Ni)                                                                                                                                           | MOF | [201] | 298 | 0.207422 | 2684.934 | 1106.816 | 0.792578 | 1949.313 | 162.5383 | 0        | 1        | 1        | 0.362781 | 0.00285258 | 2.04E-04   |
| 159 | M-159 | DMOF-TM1(Zn)                                                                                                                                          | MOF | [196] | 298 | 0.667818 | 2019.031 | 126.2855 | 0.332182 | 2977.4   | 603.5558 | 0        | 1        | 1        | 0.272351 | 0.00480677 | 4.01E-04   |
| 160 | M-160 | DMOF-TM2(Zn)                                                                                                                                          | MOF | [196] | 298 | 0.921714 | 3371.946 | 211.7989 | 0.078286 | 1227.579 | 456.233  | 0        | 1        | 1        | 0.414926 | 0.00419673 | 3.82E-04   |
| 161 | M-161 | DUT-10(Zn)                                                                                                                                            | MOF | [18]  | 298 | 0.314576 | 384.9323 | 89.42328 | 0.227271 | 1895.238 | 539.187  | 0.458152 | 230.1206 | 41.89914 | 0.446058 | 0.00511756 | 0.00102351 |
| 162 | M-162 | DUT-4                                                                                                                                                 | MOF | [41]  | 298 | 0.986261 | 1015.7   | 374.6411 | 0.013739 | 5830.375 | 1941.031 | 0        | 28667.8  | 40.31983 | 0.672343 | 0.0378782  | 0.00291371 |
| 163 | M-163 | DUT-51(Zr)                                                                                                                                            | MOF | [190] | 298 | 0.219275 | 1952.882 | 673.5299 | 0.780725 | 1094.815 | 112.1042 | 0        | 1        | 1        | 0.547637 | 0.00512867 | 2.56E-04   |

|     |       |                                     |     |       |     |          |          |          |          |          |          |          |          |          |          |            |            |
|-----|-------|-------------------------------------|-----|-------|-----|----------|----------|----------|----------|----------|----------|----------|----------|----------|----------|------------|------------|
| 164 | M-164 | DUT-52(Zr)                          | MOF | [216] | 298 | 0.393348 | 2756.75  | 1306.62  | 0.29511  | 201.3502 | 69.74464 | 0.311542 | 2577.099 | 98.74416 | 0.28068  | 0.01545755 | 7.73E-04   |
| 165 | M-165 | DUT-53(Hf)                          | MOF | [216] | 298 | 0.58255  | 1690.564 | 994.6235 | 0.41745  | 2509.04  | 62.78436 | 0        | 1        | 1        | 0.199289 | 0.024091   | 0.00114719 |
| 166 | M-166 | DUT-67                              | MOF | [75]  | 298 | 0.503223 | 2572.146 | 359.7785 | 0.231963 | 6710.328 | 1063.468 | 0.264813 | 3421.127 | 49.97068 | 0.505598 | 0.01158343 | 4.83E-04   |
| 167 | M-167 | DUT-67(Hf)                          | MOF | [162] | 298 | 0.500243 | 2208.876 | 268.3965 | 0.499757 | 3779.809 | 1247.496 | 0        | 1        | 1        | 0.280351 | 0.00823291 | 4.57E-04   |
| 168 | M-168 | DUT-68(Hf)                          | MOF | [162] | 298 | 0.406801 | 2230.142 | 48.8466  | 0.593199 | 3715.708 | 1344.496 | 0        | 1        | 1        | 0.275936 | 0.00742026 | 2.75E-04   |
| 169 | M-169 | DUT-68(Zr)                          | MOF | [162] | 298 | 0.375257 | 2250.23  | 55.96516 | 0.624743 | 3433.105 | 1402.658 | 0        | 1        | 1        | 0.342094 | 0.00881618 | 3.67E-04   |
| 170 | M-170 | DUT-69(Hf)                          | MOF | [162] | 298 | 0.500491 | 1493.04  | 862.378  | 0.499509 | 5378.798 | 1213.53  | 0        | 1        | 1        | 0.184688 | 0.01392542 | 6.05E-04   |
| 171 | M-171 | DUT-69(Zr)                          | MOF | [162] | 298 | 0.991949 | 2693.188 | 1537.377 | 0.008051 | 4644.066 | 127.496  | 0        | 1        | 1        | 0.221023 | 0.03325509 | 0.00144587 |
| 172 | M-172 | DUT-84(Zr)                          | MOF | [216] | 298 | 0.778632 | 2143.329 | 969.5693 | 0.221368 | 3741.428 | 1326.341 | 0        | 1        | 1        | 0.125666 | 0.0167259  | 0.00119471 |
| 173 | M-173 | ED-ZIF-8                            | MOF | [3]   | 298 | 0.495424 | 1903.182 | 221.7082 | 0.504576 | 3617.912 | 754.2025 | 0        | 1        | 1        | 0.0032   | 0.0088483  | 0.00110604 |
| 174 | M-174 | Et-MnCr                             | MOF | [112] | 298 | 0.512585 | 2359.228 | 1193.12  | 0.487415 | 3249.845 | 428.1259 | 0        | 1        | 1        | 0.1018   | 0.04433905 | 0.00170535 |
| 175 | M-175 | FeFIV1E-1-Ni                        | MOF | [177] | 308 | 0.704895 | 7574.122 | 3073.259 | 0.067486 | 9765.54  | 113.2924 | 0.227619 | 13096.82 | 502.8588 | 0.257916 | 0.01685931 | 9.37E-04   |
| 176 | M-176 | HKUST-1-F                           | MOF | [11]  | 298 | 0.707847 | 94.94752 | 6.889319 | 0.292153 | 6392.671 | 2062.858 | 0        | 1        | 1        | 1.001542 | 0.15578135 | 0.00370908 |
| 177 | M-177 | HV-MOF-1(Er)                        | MOF | [231] | 298 | 0.510172 | 1291.848 | 577.5289 | 0.489828 | 4701.221 | 1292.941 | 0        | 1        | 1        | 0.097572 | 0.00964097 | 6.03E-04   |
| 178 | M-178 | IPM-MOF-201(Ni)                     | MOF | [160] | 298 | 0.507667 | 940.793  | 481.3307 | 0.492333 | 5230.643 | 1680.261 | 0        | 1        | 1        | 0.201533 | 0.01663662 | 7.92E-04   |
| 179 | M-179 | ISE-1(Ni)                           | MOF | [211] | 313 | 0.317471 | 3352.105 | 518.875  | 0.682529 | 7566.331 | 2024.367 | 0        | 1        | 1        | 0.14361  | 0.01209501 | 0.00134389 |
| 180 | M-180 | JUC-110                             | MOF | [96]  | 298 | 0.55939  | 2903.706 | 985.3003 | 0.44061  | 7794.129 | 1868.902 | 0        | 1        | 1        | 0.098133 | 0.00544059 | 1.94E-04   |
| 181 | M-181 | JUK-8(Zn)                           | MOF | [239] | 298 | 0.641759 | 1462.478 | 33.2039  | 0.266362 | 5871.28  | 3005.084 | 0.091879 | 41394.71 | 10879.19 | 0.242198 | 0.10320437 | 0.00412817 |
| 182 | M-182 | kag-MOF-1(Zn)                       | MOF | [170] | 298 | 1        | 6455.272 | 1505.02  | 6.88E-15 | 412399.1 | 618.1548 | 0        | 1        | 1        | 0.119363 | 0.01617028 | 0.00147003 |
| 183 | M-183 | KMF-1(Al)                           | MOF | [240] | 303 | 0.278685 | 4712.993 | 1585.448 | 0.721315 | 5012.989 | 59.44821 | 0        | 1        | 1        | 0.433045 | 0.00424844 | 2.36E-04   |
| 184 | M-184 | La(py2dc)L5                         | MOF | [236] | 298 | 0.295391 | 954.179  | 304.1234 | 0.704609 | 3812.225 | 1373.619 | 0        | 1        | 1        | 0.018265 | 0.0085916  | 7.16E-04   |
| 185 | M-185 | LA^1-Zr6^12-shp                     | MOF | [182] | 298 | 0.339518 | 4907.364 | 1884.863 | 0.660482 | 1292.343 | 276.9442 | 0        | 1        | 1        | 0.351303 | 0.015376   | 9.04E-04   |
| 186 | M-186 | LA^1-Zr6^8-csq                      | MOF | [182] | 298 | 0.870251 | 1126.099 | 234.6506 | 0.129749 | 2864.75  | 3443.152 | 0        | 1        | 1        | 0.38428  | 0.02590304 | 0.00136332 |
| 187 | M-187 | LA^1-Zr6^8-flu                      | MOF | [182] | 298 | 0.768701 | 772.8882 | 123.7483 | 0.231299 | 3425.356 | 1361.13  | 0        | 1        | 1        | 0.198209 | 0.01344395 | 7.91E-04   |
| 188 | M-188 | LA^2-Zr6^12-shp                     | MOF | [182] | 298 | 0.638104 | 1218.969 | 117.5587 | 0.36841  | 4462.436 | 1874.588 | 0        | 6180.757 | 8.157055 | 1.005081 | 0.03521449 | 0.00234763 |
| 189 | M-189 | LA^2-Zr6^8-csq                      | MOF | [182] | 298 | 0.098366 | 3584.241 | 1404.212 | 0.901634 | 652.5199 | 60.0177  | 0        | 1        | 1        | 1.449598 | 0.00573394 | 3.19E-04   |
| 190 | M-190 | LA^3-Zr6^8-flu                      | MOF | [182] | 298 | 0.810676 | 745.6139 | 80.80403 | 0.189324 | 3304.372 | 1040.572 | 0        | 1        | 1        | 0.745239 | 0.02059581 | 0.00102979 |
| 191 | M-191 | Lanthanum Triazolyl Phosphonate MOF | MOF | [116] | 298 | 0.391869 | 3807.986 | 3049.19  | 0.608131 | 3453.771 | 114.7683 | 0        | 1        | 1        | 0.274053 | 0.07768506 | 0.00369929 |
| 192 | M-192 | LB^1-Zr6^8-flu                      | MOF | [182] | 298 | 0.964052 | 1222.552 | 377.2726 | 0.067399 | 10206.43 | 1552.432 | 0        | 24624.56 | 7190.373 | 0.199008 | 0.01534443 | 9.03E-04   |
| 193 | M-193 | LB^2-Zr6^8-csq                      | MOF | [182] | 298 | 0.805986 | 1260.831 | 68.80899 | 0.079677 | 726.5926 | 62.64983 | 0.114337 | 3678.79  | 1452.062 | 1.298984 | 0.03078334 | 0.00205222 |
| 194 | M-194 | LB^2-Zr6^8-scu                      | MOF | [182] | 298 | 0.518139 | 1173.967 | 46.42733 | 0.1719   | 7241.4   | 1928.605 | 0.309962 | 2037.57  | 697.3091 | 0.751842 | 0.00834751 | 4.91E-04   |
| 195 | M-195 | LB^3-Zr6^8-flu                      | MOF | [182] | 298 | 0.140481 | 6687.757 | 3697.47  | 0.859519 | 1654.715 | 191.176  | 0        | 1        | 1        | 0.720353 | 0.00555066 | 3.47E-04   |
| 196 | M-196 | LC^1-Zr6^12-fcu                     | MOF | [182] | 298 | 0.856626 | 1783.823 | 203.7619 | 0.143374 | 3416.459 | 2055.012 | 0        | 1        | 1        | 0.323389 | 0.00165443 | 9.19E-05   |
| 197 | M-197 | LC^2-Zr6^12-fcu                     | MOF | [182] | 298 | 0.420019 | 1707.372 | 294.3917 | 0.048798 | 6259.656 | 973.6299 | 0.531182 | 2137.145 | 62.70482 | 0.428422 | 0.00580368 | 2.76E-04   |
| 198 | M-198 | LC^3-Zr6^8-beu                      | MOF | [182] | 298 | 0.257995 | 3609.593 | 1107.155 | 0.742005 | 1401.769 | 104.1468 | 0        | 1        | 1        | 0.27832  | 0.00931592 | 4.05E-04   |
| 199 | M-199 | MAF-4.23-7.77                       | MOF | [197] | 298 | 0.498412 | 1785.7   | 364.6631 | 0.501588 | 2160.178 | 156.7604 | 0        | 1        | 1        | 0.44734  | 0.003578   | 1.38E-04   |
| 200 | M-200 | MAF-4.49-7.51                       | MOF | [197] | 298 | 0.50182  | 874.4354 | 210.2788 | 0.49818  | 1370.429 | 305.242  | 0        | 1        | 1        | 0.431208 | 0.00126124 | 5.26E-05   |
| 201 | M-201 | MAF-4.76-7.24                       | MOF | [197] | 298 | 0.498468 | 577.5718 | 189.657  | 0.501532 | 269.4487 | 75.02069 | 0        | 1        | 1        | 0.393276 | 0.00693721 | 3.02E-04   |
| 202 | M-202 | MAF-7(Zn)                           | MOF | [197] | 298 | 0.725857 | 2834.968 | 85.4277  | 0.274143 | 2533.703 | 881.1636 | 0        | 1        | 1        | 0.434546 | 0.00539214 | 2.00E-04   |
| 203 | M-203 | Me-FeCr                             | MOF | [112] | 298 | 0.512656 | 1547.773 | 79.80626 | 0.14004  | 5347.658 | 2413.772 | 0.347303 | 2408.546 | 270.4415 | 0.212827 | 0.01070166 | 3.15E-04   |
| 204 | M-204 | MFU-4                               | MOF | [89]  | 298 | 0.700605 | 3827.166 | 558.8586 | 0.299395 | 2871.42  | 1533.005 | 0        | 1        | 1        | 0.431396 | 0.00509063 | 8.48E-04   |
| 205 | M-205 | Mg-CPO-27                           | MOF | [112] | 298 | 0.500029 | 7164.554 | 2738.928 | 0.499971 | 27513.22 | 160.2618 | 0        | 1        | 1        | 0.637304 | 0.00603418 | 6.70E-04   |
| 206 | M-206 | Mg-CUK-1                            | MOF | [130] | 303 | 0.328581 | 2467.215 | 681.0256 | 0.671419 | 3546.614 | 117.994  | 0        | 1        | 1        | 0.363863 | 0.02610647 | 0.00137402 |

|     |       |                                   |     |       |     |          |          |          |          |          |          |          |          |          |          |            |            |
|-----|-------|-----------------------------------|-----|-------|-----|----------|----------|----------|----------|----------|----------|----------|----------|----------|----------|------------|------------|
| 207 | M-207 | Mg-MOF-74©                        | MOF | [95]  | 298 | 0.304278 | 2608.44  | 1411.766 | 0.317609 | 15783.49 | 54.55677 | 0.378112 | 9380.373 | 758.9617 | 0.662248 | 0.02104185 | 4.57E-04   |
| 208 | M-208 | MIL-100                           | MOF | [37]  | 293 | 0.743355 | 3033.496 | 482.5422 | 0.078796 | 931.2175 | 58.43063 | 0.177849 | 4999.503 | 2782.73  | 0.365318 | 0.00434744 | 4.83E-04   |
| 209 | M-209 | MIL-100(Al)                       | MOF | [178] | 298 | 0.4913   | 2062.239 | 276.7578 | 0.197285 | 3036.409 | 78.62595 | 0.311415 | 5140.737 | 1801.042 | 0.658446 | 0.03040174 | 0.00178834 |
| 210 | M-210 | MIL-100(Cr)                       | MOF | [50]  | 298 | 0.731382 | 985.567  | 360.0925 | 0.268618 | 4171.3   | 2201.736 | 0        | 1        | 1        | 0.708955 | 0.01880449 | 0.00208939 |
| 211 | M-211 | MIL-100(Cr(X=Cl))                 | MOF | [179] | 298 | 0.644131 | 2511.886 | 378.3194 | 0.226958 | 7218.792 | 1938.229 | 0.128911 | 3430.666 | 121.5384 | 0.599269 | 0.02005018 | 9.55E-04   |
| 212 | M-212 | MIL-100(Cr(X=SO4))                | MOF | [179] | 298 | 0.526002 | 2558.143 | 304.3808 | 0.183556 | 8954.215 | 1962.857 | 0.290442 | 3822.426 | 250.3033 | 0.607773 | 0.01299275 | 5.65E-04   |
| 213 | M-213 | MIL-100(Cr)-DEG                   | MOF | [34]  | 293 | 0.791778 | 1061.739 | 1795.842 | 0.444717 | 2486.561 | 370.0798 | 0        | 14507.87 | 20.22559 | 0.560718 | 0.00795079 | 8.83E-04   |
| 214 | M-214 | MIL-100(Cr)-EG                    | MOF | [34]  | 293 | 0.684451 | 2084.654 | 756.5853 | 0.142003 | 2550.358 | 43.19899 | 0.173545 | 5469.522 | 2616.464 | 0.429676 | 0.00834059 | 0.00104257 |
| 215 | M-215 | MIL-100(Cr)-EN                    | MOF | [34]  | 293 | 0.713852 | 2163.905 | 843.5579 | 0.141109 | 3005.126 | 337.7383 | 0.145039 | 6349.314 | 2008.047 | 0.368281 | 0.00642222 | 8.03E-04   |
| 216 | M-216 | MIL-100(Cr)-TEG                   | MOF | [34]  | 293 | 0.685031 | 1879.206 | 785.5674 | 0.104018 | 6624.063 | 1734.369 | 0.210951 | 2665.568 | 170.0879 | 0.330679 | 0.00804615 | 8.05E-04   |
| 217 | M-217 | MIL-100(Fe)                       | MOF | [41]  | 298 | 0.621864 | 2408.045 | 365.0629 | 0.093203 | 8461.044 | 526.4078 | 0.284933 | 2447.375 | 1011.061 | 0.824966 | 0.01702265 | 0.00130943 |
| 218 | M-218 | MIL-100V                          | MOF | [125] | 298 | 0.434562 | 1847.247 | 433.7706 | 0.565438 | 6178.951 | 1912.118 | 0        | 1        | 1        | 0.151153 | 0.00654863 | 6.55E-04   |
| 219 | M-219 | MIL-101(Al)-NH2                   | MOF | [199] | 298 | 0.507893 | 2155.121 | 502.0777 | 0.000878 | 29645.11 | 102.0575 | 0.491229 | 6063.808 | 3389.427 | 0.268538 | 0.02766176 | 0.00138309 |
| 220 | M-220 | MIL-101(Al)-URPh                  | MOF | [199] | 298 | 0.504792 | 1836.967 | 481.5588 | 0.495208 | 4927.123 | 2192.562 | 0        | 1        | 1        | 0.325854 | 0.00983351 | 4.47E-04   |
| 221 | M-221 | MIL-101(Cr)-pCOOH                 | MOF | [183] | 298 | 0.634841 | 1928.81  | 366.4655 | 0.247902 | 2418.404 | 28.38242 | 0.117257 | 4691.697 | 3381.855 | 1.031695 | 0.01510037 | 8.39E-04   |
| 222 | M-222 | MIL-101(Cr)-pMal                  | MOF | [183] | 298 | 0.490238 | 1920.3   | 1188.625 | 0.509762 | 2213.925 | 221.2802 | 0        | 1        | 1        | 0.701877 | 0.01835266 | 8.74E-04   |
| 223 | M-223 | MIL-101(Cr)-pUR2                  | MOF | [183] | 298 | 0.460782 | 1788.156 | 106.698  | 0.328099 | 1225.028 | 57.80958 | 0.211119 | 3072.14  | 1398.303 | 0.68424  | 0.01167794 | 7.79E-04   |
| 224 | M-224 | MIL-101-NH2                       | MOF | [42]  | 298 | 0.323691 | 1473.737 | 1091.141 | 0.305998 | 2074.554 | 74.57307 | 0.370311 | 2482.963 | 32.62592 | 1.052714 | 0.04300037 | 0.00119445 |
| 225 | M-225 | MIL-101-SO3H                      | MOF | [42]  | 298 | 0.565383 | 2945.146 | 557.4294 | 0.251749 | 5187.709 | 3339.362 | 0.182868 | 2457.896 | 16.57479 | 0.745162 | 0.02119939 | 5.30E-04   |
| 226 | M-226 | MIL-101V                          | MOF | [125] | 298 | 0.514902 | 3332.318 | 1339.494 | 0.256263 | 902.618  | 43.78099 | 0.228835 | 10109.71 | 1273.782 | 0.25369  | 0.00625235 | 5.68E-04   |
| 227 | M-227 | MIL-125                           | MOF | [28]  | 298 | 0.456981 | 2482.835 | 102.7297 | 0.317129 | 2280.338 | 3.657329 | 0.225891 | 1650.258 | 1089.354 | 0.28895  | 0.00410394 | 3.16E-04   |
| 228 | M-228 | MIL-125(Ti)-NH3 <sup>+</sup> +Cl- | MOF | [181] | 293 | 0.393348 | 3222.779 | 1549.529 | 0.606652 | 4002.788 | 55.48829 | 0        | 1        | 1        | 0.58048  | 0.00675389 | 4.82E-04   |
| 229 | M-229 | MIL-125(Ti)-NHCyp                 | MOF | [169] | 308 | 0.504632 | 2127.473 | 680.7324 | 0.495368 | 4680.151 | 1386.264 | 0        | 1        | 1        | 0.110675 | 0.00879604 | 8.80E-04   |
| 230 | M-230 | MIL-125(Ti)-NHMe                  | MOF | [169] | 308 | 0.462828 | 3317.081 | 178.2343 | 0.537172 | 3389.008 | 1277.408 | 0        | 1        | 1        | 0.294219 | 0.00675069 | 4.82E-04   |
| 231 | M-231 | MIL-125-NH2                       | MOF | [112] | 298 | 0.492814 | 4139.952 | 133.5502 | 0.507186 | 4372.903 | 1195.19  | 0        | 1        | 1        | 0.368255 | 0.00848237 | 5.65E-04   |
| 232 | M-232 | MIL-160                           | MOF | [2]   | 303 | 0.417007 | 5602.208 | 1692.244 | 0.010332 | 124668.1 | 175.4971 | 0.572661 | 6303.936 | 526.3767 | 0.497066 | 0.00682446 | 3.10E-04   |
| 233 | M-233 | MIL-163                           | MOF | [8]   | 298 | 0.62787  | 1353.897 | 190.1964 | 0.37213  | 2540.055 | 2235.248 | 0        | 1        | 1        | 0.583277 | 0.02114975 | 6.04E-04   |
| 234 | M-234 | MIL-47(V)-F                       | MOF | [223] | 323 | 0.123015 | 4665.792 | 1464.924 | 0.876985 | 1403.93  | 203.0093 | 0        | 1        | 1        | 0.179958 | 0.00362707 | 2.42E-04   |
| 235 | M-235 | MIL-47(V)-F2                      | MOF | [218] | 293 | 0.502379 | 1095.14  | 246.4745 | 0.292277 | 1414.428 | 27.29647 | 0.205343 | 1712.651 | 684.5472 | 0.175171 | 0.00926737 | 5.79E-04   |
| 236 | M-236 | MIL-53(Al)-(OH)0.34(NH2)0.66      | MOF | [208] | 298 | 0.49824  | 6283.572 | 3130.779 | 0.50176  | 6656.634 | 2954.007 | 0        | 1        | 1        | 0.103621 | 0.03633657 | 0.00227104 |
| 237 | M-237 | MIL-53(Al)-(OH)0.53(NH2)0.47      | MOF | [208] | 298 | 0.50908  | 253.1494 | 43.29441 | 0.49092  | 6240.829 | 2796.482 | 0        | 1        | 1        | 0.209207 | 0.01274881 | 6.71E-04   |
| 238 | M-238 | MIL-53(Al)-(OH)0.68(NH2)0.32      | MOF | [208] | 298 | 0.660194 | 443.6292 | 117.6896 | 0.339806 | 8016.379 | 2625.033 | 0        | 1        | 1        | 0.441262 | 0.0070403  | 3.06E-04   |
| 239 | M-239 | MIL-53(Al)-(OH)2                  | MOF | [202] | 298 | 0.706559 | 851.3172 | 282.7144 | 0.293441 | 8205.895 | 2664.164 | 0        | 1        | 1        | 0.401615 | 0.02520695 | 0.00105029 |
| 240 | M-240 | MIL-53(Al)-Br                     | MOF | [202] | 298 | 0.390753 | 522.2401 | 121.6543 | 0.609247 | 3012.039 | 1198.4   | 0        | 1        | 1        | 0.10345  | 0.03227673 | 0.00189863 |
| 241 | M-241 | MIL-53(Al)-CH3                    | MOF | [202] | 298 | 0.332006 | 735.2095 | 249.5307 | 0.667994 | 4527.531 | 1049.091 | 0        | 1        | 1        | 0.113056 | 0.0056009  | 3.50E-04   |
| 242 | M-242 | MIL-53(Al)-Cl                     | MOF | [202] | 298 | 0.697429 | 4797.332 | 1312.309 | 0.001366 | 19959.63 | 35.21033 | 0.301205 | 664.5786 | 215.4774 | 0.136664 | 0.00637459 | 4.55E-04   |
| 243 | M-243 | MIL-53(Al)-F                      | MOF | [223] | 323 | 0.4948   | 436.3747 | 84.13191 | 0.054353 | 6348.469 | 1761.96  | 0.450847 | 1138.488 | 128.0168 | 0.064325 | 5.26E-04   | 4.05E-05   |
| 244 | M-244 | MIL-53(Al)-F2                     | MOF | [218] | 293 | 0.256529 | 293.396  | 112.2513 | 0.743471 | 1254.531 | 316.0496 | 0        | 1        | 1        | 0.234428 | 0.00514577 | 2.57E-04   |
| 245 | M-245 | MIL-53(Al)ht                      | MOF | [105] | 298 | 0.906468 | 5198.046 | 454.6547 | 0.093532 | 1794.978 | 741.2177 | 0        | 1        | 1        | 0.082386 | 0.00181373 | 9.55E-05   |
| 246 | M-246 | MIL-53(Al)it                      | MOF | [105] | 298 | 0.495934 | 1103.995 | 89.40362 | 0.504066 | 2054.801 | 1138.514 | 0        | 1        | 1        | 0.169374 | 0.0131529  | 6.58E-04   |
| 247 | M-247 | MIL-53(Al)-NH2                    | MOF | [176] | 298 | 0.747711 | 6640.441 | 2674.838 | 0.022806 | 10590.39 | 66.48122 | 0.229483 | 9430.376 | 325.2914 | 0.084718 | 0.01584956 | 0.00144087 |
| 248 | M-248 | MIL-53(Al)-NO2                    | MOF | [202] | 298 | 0.353262 | 990.202  | 487.0898 | 0.646738 | 7128.806 | 1319.493 | 0        | 1        | 1        | 0.122393 | 0.01232508 | 7.70E-04   |
| 249 | M-249 | MIL-53(Al)-OH                     | MOF | [175] | 298 | 0.651331 | 538.0821 | 86.51005 | 0.348669 | 5198.504 | 2179.032 | 0        | 1        | 1        | 0.390638 | 0.0048294  | 1.93E-04   |

|     |       |                                                                                |     |       |     |          |          |          |          |          |          |          |          |          |          |            |            |
|-----|-------|--------------------------------------------------------------------------------|-----|-------|-----|----------|----------|----------|----------|----------|----------|----------|----------|----------|----------|------------|------------|
| 250 | M-250 | MIL-53(Al)-TDC                                                                 | MOF | [194] | 298 | 0.591613 | 1268.627 | 1331.969 | 0.479048 | 2517.43  | 86.55613 | 0        | 17910.84 | 25.13513 | 0.535171 | 0.02853157 | 0.00150166 |
| 251 | M-251 | MIL-53(Cr)                                                                     | MOF | [68]  | 298 | 0.780831 | 52.0721  | 46.33583 | 0.219169 | 5010.95  | 464.5444 | 0        | 1        | 1        | 0.326576 | 0.22028366 | 0.03146909 |
| 252 | M-252 | MIL-53(Fe)-(COOH) <sub>2</sub>                                                 | MOF | [175] | 298 | 0.355945 | 490.1338 | 384.9797 | 0.644055 | 8163.521 | 2363.662 | 0        | 1        | 1        | 0.147994 | 0.02127309 | 0.00125136 |
| 253 | M-253 | MIL-53(Ga)                                                                     | MOF | [176] | 298 | 0.498912 | 6803.662 | 3154.177 | 0.501088 | 9571.371 | 148.6663 | 0        | 1        | 1        | 0.062017 | 0.0058068  | 5.28E-04   |
| 254 | M-254 | MIL-53(Ga)-NH <sub>2</sub>                                                     | MOF | [176] | 298 | 0.548667 | 534.6001 | 143.3098 | 0.451333 | 6416.233 | 2992.1   | 0        | 1        | 1        | 0.171048 | 0.03015203 | 0.00177365 |
| 255 | M-255 | MIL-68(In)                                                                     | MOF | [176] | 298 | 0.071354 | 999.0263 | 429.5969 | 0.928646 | 1336.567 | 19.64387 | 0        | 1        | 1        | 0.300081 | 0.01703466 | 0.00106467 |
| 256 | M-256 | MIL-68(In)-NH <sub>2</sub>                                                     | MOF | [176] | 298 | 0.7676   | 1998.915 | 37.705   | 0.2324   | 2133.297 | 833.9159 | 0        | 1        | 1        | 0.332354 | 0.00832915 | 3.97E-04   |
| 257 | M-257 | MIL-91(Ti)                                                                     | MOF | [217] | 298 | 0.505564 | 4330.91  | 2797.727 | 0.494436 | 11874.37 | 882.4846 | 0        | 1        | 1        | 0.209607 | 0.01660419 | 7.91E-04   |
| 258 | M-258 | MIP-200                                                                        | MOF | [129] | 303 | 0.53283  | 4237.455 | 123.2385 | 0.46717  | 8273.98  | 4010.785 | 0        | 1        | 1        | 0.424402 | 0.02253365 | 9.39E-04   |
| 259 | M-259 | Mn <sub>2</sub> (Gd-H-DOTA-4AmP)(H <sub>2</sub> O) <sub>7</sub>                | MOF | [204] | 298 | 0.276375 | 531.5643 | 96.09803 | 0.723625 | 4671.6   | 1834.66  | 0        | 1        | 1        | 0.280111 | 0.02378695 | 0.00169907 |
| 260 | M-260 | Mn <sub>2</sub> Cl <sub>2</sub> (BTDD)                                         | MOF | [132] | 298 | 0.302483 | 477.9604 | 116.7864 | 0.697517 | 4544.661 | 1924.591 | 0        | 1        | 1        | 0.360883 | 0.0255045  | 0.0017003  |
| 261 | M-261 | MOF-1(Ce,Eu)                                                                   | MOF | [233] | 298 | 0.69108  | 1600.959 | 558.3068 | 0.30892  | 7762.754 | 1918.685 | 0        | 1        | 1        | 0.062526 | 0.00634177 | 3.17E-04   |
| 262 | M-262 | MOF-303(Al)                                                                    | MOF | [157] | 303 | 0.508353 | 5080.664 | 202.9002 | 0.491647 | 5478.487 | 2340.013 | 0        | 1        | 1        | 0.427712 | 0.0183572  | 4.48E-04   |
| 263 | M-263 | MOF-74(Ni)-BPP                                                                 | MOF | [186] | 298 | 0.320171 | 3509.614 | 199.8216 | 0.679829 | 4065.848 | 2096.239 | 0        | 1        | 1        | 0.733469 | 0.01688704 | 0.00120622 |
| 264 | M-264 | MOF-74(Ni)-TPP                                                                 | MOF | [186] | 298 | 0.818534 | 1598.128 | 256.8818 | 0.181466 | 7835.326 | 1917.151 | 0        | 1        | 1        | 0.891861 | 0.00736671 | 4.91E-04   |
| 265 | M-265 | MOS-1(Co)                                                                      | MOF | [171] | 298 | 0.511117 | 3812.635 | 656.8152 | 0.488883 | 8374.288 | 1102.98  | 0        | 1        | 1        | 0.315437 | 0.00308133 | 3.08E-04   |
| 266 | M-266 | MOS-2(Co)                                                                      | MOF | [171] | 298 | 0.621184 | 3324.605 | 1080.775 | 0.378816 | 8788.933 | 1214.002 | 0        | 1        | 1        | 0.144878 | 0.00270646 | 3.38E-04   |
| 267 | M-267 | MOS-3(Co)                                                                      | MOF | [171] | 298 | 0.510144 | 2192.276 | 1016.12  | 8.96E-07 | 46199.63 | 87.78811 | 0.489855 | 7712.262 | 1484.597 | 0.130331 | 0.0103277  | 0.00206554 |
| 268 | M-268 | MUF-77(Zn)-butyl                                                               | MOF | [215] | 298 | 0.901684 | 447.3653 | 49.19317 | 0.098316 | 499.4139 | 17.72988 | 0        | 1        | 1        | 0.226977 | 0.00878852 | 4.39E-04   |
| 269 | M-269 | MUF-77(Zn)-decyl                                                               | MOF | [215] | 298 | 0.264917 | 0.696998 | 867.9431 | 0.847617 | 294.2208 | 58.75272 | 0        | 9200.818 | 12.86373 | 0.140886 | 0.00669688 | 4.46E-04   |
| 270 | M-270 | MUF-77(Zn)-ethyl                                                               | MOF | [215] | 298 | 0.508455 | 554.3279 | 42.00971 | 0.491545 | 491.3864 | 101.7306 | 0        | 1        | 1        | 0.253011 | 0.00552182 | 2.12E-04   |
| 271 | M-271 | MUF-77(Zn)-hexyl                                                               | MOF | [215] | 298 | 0.082821 | 1223.212 | 439.1074 | 0.917179 | 273.9079 | 43.71072 | 0        | 1        | 1        | 0.142063 | 0.01257319 | 5.47E-04   |
| 272 | M-272 | MUF-77(Zn)-methyl                                                              | MOF | [215] | 298 | 0.211065 | 505.4844 | 243.6987 | 0.788935 | 823.8007 | 25.39946 | 0        | 1        | 1        | 0.199194 | 0.00564913 | 2.82E-04   |
| 273 | M-273 | MUF-77(Zn)-octyl                                                               | MOF | [215] | 298 | 0.090783 | 1851.078 | 562.6628 | 0.909217 | 397.6711 | 80.02301 | 0        | 1        | 1        | 0.107961 | 0.00352268 | 1.76E-04   |
| 274 | M-274 | MUF-7a(Zn)                                                                     | MOF | [215] | 298 | 0.747071 | 1844.755 | 162.1853 | 0.252929 | 296.8932 | 113.3357 | 0        | 1        | 1        | 0.1602   | 0.01102679 | 6.13E-04   |
| 275 | M-275 | NBu <sub>4</sub>                                                               | MOF | [112] | 298 | 0.505808 | 816.536  | 424.3487 | 0.494192 | 4027.483 | 1900.835 | 0        | 1        | 1        | 0.010976 | 0.04427806 | 0.00368984 |
| 276 | M-276 | NENU-11                                                                        | MOF | [69]  | 298 | 0.500213 | 4840.618 | 429.3322 | 0.499787 | 5931.22  | 1371.319 | 0        | 1        | 1        | 0.024384 | 0.01425679 | 2.59E-04   |
| 277 | M-277 | Ni(BTTB)                                                                       | MOF | [212] | 298 | 0.512401 | 2532.927 | 951.8299 | 0.487599 | 5660.017 | 2033.345 | 0        | 1        | 1        | 0.011727 | 0.01321904 | 0.0013219  |
| 278 | M-278 | Ni(dpip) <sub>2</sub> .5DMF                                                    | MOF | [237] | 298 | 0.511184 | 2899.455 | 539.038  | 0.488816 | 3103.751 | 1456.731 | 0        | 1        | 1        | 0.197664 | 0.01480613 | 5.92E-04   |
| 279 | M-279 | Ni <sub>2</sub> Zn <sub>75</sub> -MOF-74                                       | MOF | [188] | 298 | 0.496317 | 5253.587 | 560.9479 | 0.503683 | 5780.76  | 1520.251 | 0        | 1        | 1        | 0.51525  | 0.00683867 | 5.70E-04   |
| 280 | M-280 | Ni <sub>2</sub> Cl <sub>2</sub> (BTDD)                                         | MOF | [132] | 298 | 0.66111  | 2803.983 | 40.85867 | 0.33889  | 4417.011 | 2109.289 | 0        | 1        | 1        | 0.735604 | 0.01204018 | 5.47E-04   |
| 281 | M-281 | Ni <sub>2</sub> Cl <sub>2</sub> BBTA                                           | MOF | [195] | 298 | 0.508996 | 5027.303 | 1947.814 | 0.491004 | 10268.8  | 418.5787 | 0        | 1        | 1        | 0.403992 | 0.05047138 | 0.0029689  |
| 282 | M-282 | Ni <sub>3</sub> C <sub>8</sub> H <sub>11</sub> N <sub>18</sub> O <sub>29</sub> | MOF | [56]  | 298 | 0.510934 | 746.8534 | 314.7162 | 0.489066 | 4205.262 | 1329.151 | 0        | 1        | 1        | 0.255224 | 0.02322476 | 9.68E-04   |
| 283 | M-283 | Ni <sub>50</sub> Zn <sub>50</sub> -MOF-74                                      | MOF | [188] | 298 | 0.502967 | 5759.136 | 1603.408 | 0.497033 | 6048.783 | 515.7612 | 0        | 1        | 1        | 0.534689 | 0.0037092  | 3.09E-04   |
| 284 | M-284 | Ni <sub>75</sub> Zn <sub>25</sub> -MOF-74                                      | MOF | [188] | 298 | 0.502608 | 5221.225 | 1480.664 | 0.497392 | 5140.046 | 543.2289 | 0        | 1        | 1        | 0.558835 | 0.00509761 | 3.64E-04   |
| 285 | M-285 | Ni <sub>8</sub> (L1)6                                                          | MOF | [6]   | 298 | 0.670325 | 248.7041 | 141.9782 | 0.329675 | 5884.062 | 1523.122 | 0        | 1        | 1        | 0.400567 | 0.03571427 | 0.00210084 |
| 286 | M-286 | Ni <sub>8</sub> (L2)6                                                          | MOF | [6]   | 298 | 0.496607 | 237.8638 | 84.15512 | 0.193921 | 2743.507 | 178.1743 | 0.309472 | 2826.315 | 1076.274 | 0.606962 | 0.01319217 | 7.76E-04   |
| 287 | M-287 | Ni <sub>8</sub> (L3)6                                                          | MOF | [6]   | 298 | 0.48553  | 217.653  | 108.3299 | 0.049965 | 5782.932 | 2918.78  | 0.464505 | 2078.159 | 166.5243 | 0.927167 | 0.01107563 | 6.15E-04   |
| 288 | M-288 | Ni <sub>8</sub> (L4)6                                                          | MOF | [6]   | 298 | 0.289546 | 177.4771 | 81.38462 | 0.50945  | 1920.717 | 88.64337 | 0.201004 | 1770.304 | 666.5864 | 0.878911 | 0.00774963 | 4.56E-04   |
| 289 | M-289 | Ni <sub>8</sub> (L5-(CF <sub>3</sub> ) <sub>2</sub> ) <sub>6</sub>             | MOF | [6]   | 298 | 0.936497 | 427.3448 | 59.79    | 0.063503 | 2676.745 | 1196.518 | 0        | 1        | 1        | 0.851119 | 0.00172831 | 7.51E-05   |
| 290 | M-290 | Ni <sub>8</sub> (L5-(CH <sub>3</sub> ) <sub>2</sub> ) <sub>6</sub>             | MOF | [6]   | 298 | 0.287433 | 832.9993 | 1239.585 | 0.712567 | 850.7145 | 44.89623 | 0        | 1        | 1        | 0.636498 | 0.02303556 | 8.86E-04   |
| 291 | M-291 | Ni-CUK-1                                                                       | MOF | [130] | 303 | 0.213688 | 2757.722 | 1528.498 | 0.786312 | 5105.776 | 146.7415 | 0        | 1        | 1        | 0.308396 | 0.00392554 | 1.35E-04   |
| 292 | M-292 | Ni-DOBDC                                                                       | MOF | [81]  | 298 | 0.463666 | 5400.988 | 3628.447 | 1.85E-05 | 122772.2 | 172.9244 | 0.536315 | 9750.556 | 255.9781 | 0.699552 | 0.02234932 | 0.00372489 |

|     |       |                                   |     |       |     |          |          |          |          |          |          |          |          |          |          |            |            |
|-----|-------|-----------------------------------|-----|-------|-----|----------|----------|----------|----------|----------|----------|----------|----------|----------|----------|------------|------------|
| 293 | M-293 | Ni-MOF                            | MOF | [198] | 298 | 1        | 490.8316 | 1653.848 | 0.388157 | 2658.252 | 70.53188 | 0        | 8749.555 | 449.4651 | 0.449167 | 0.01422168 | 6.46E-04   |
| 294 | M-294 | NU-1000(Zr)                       | MOF | [185] | 298 | 0.602408 | 1000.758 | 445.6731 | 0.501022 | 554.0378 | 83.67076 | 0        | 30949.46 | 43.43242 | 1.37234  | 0.0076781  | 9.60E-04   |
| 295 | M-295 | NU-1000(Zr)-SALI-1                | MOF | [185] | 298 | 0.544869 | 799.7138 | 282.6519 | 0.093915 | 4231.759 | 751.0957 | 0.361216 | 445.4653 | 47.70256 | 0.865542 | 0.00284893 | 4.75E-04   |
| 296 | M-296 | NU-1000(Zr)-SALI-7                | MOF | [185] | 298 | 0.492511 | 880.0559 | 332.2543 | 0.077041 | 4967.567 | 430.4169 | 0.430448 | 342.1594 | 85.37631 | 0.457813 | 0.00356125 | 5.09E-04   |
| 297 | M-297 | NU-1000(Zr)-SALI-9                | MOF | [185] | 298 | 0.513506 | 955.2464 | 1254.92  | 0.793625 | 315.7282 | 199.7835 | 0        | 3912.165 | 70.81256 | 0.36091  | 0.002716   | 3.88E-04   |
| 298 | M-298 | NU-1000(Zr)-TFA                   | MOF | [241] | 298 | 0.132879 | 2639.07  | 1817.63  | 0.867121 | 1037.2   | 63.53054 | 0        | 1        | 1        | 1.276978 | 0.0050816  | 2.67E-04   |
| 299 | M-299 | NU-901(Zr)-TFA                    | MOF | [241] | 298 | 0.190143 | 2931.194 | 1838.219 | 0.809857 | 1490.835 | 87.05099 | 0        | 1        | 1        | 0.563327 | 0.00579749 | 3.05E-04   |
| 300 | M-300 | NU-905(Zr)-TFA                    | MOF | [241] | 298 | 0.687692 | 2217.696 | 38.0205  | 0.312308 | 1790.152 | 713.5145 | 0        | 1        | 1        | 0.727495 | 0.0065702  | 3.46E-04   |
| 301 | M-301 | PCP-1(La)                         | MOF | [165] | 298 | 0.599049 | 976.6407 | 384.0573 | 0.400951 | 4048.833 | 1425.569 | 0        | 1        | 1        | 0.098091 | 0.0127391  | 9.80E-04   |
| 302 | M-302 | Pip-CPO-27-Ni                     | MOF | [100] | 298 | 0.723051 | 7695.038 | 3314.398 | 0.276949 | 14944.16 | 52.62422 | 0        | 1        | 1        | 0.283069 | 0.04154519 | 0.00109329 |
| 303 | M-303 | PZOF-2                            | MOF | [75]  | 298 | 0.470192 | 733.0653 | 60.1039  | 0.529808 | 666.3301 | 18.35891 | 0        | 1        | 1        | 0.690592 | 0.01043864 | 4.18E-04   |
| 304 | M-304 | pretreated a-Al                   | MOF | [114] | 298 | 0.357451 | 3330.099 | 1303.38  | 0.12571  | 7192.665 | 2089.708 | 0.516839 | 4457.374 | 41.84832 | 0.007948 | 0.02265757 | 0.0011925  |
| 305 | M-305 | pretreated m-Al                   | MOF | [114] | 298 | 0.504771 | 3324.861 | 1108.809 | 0.111448 | 9448.807 | 823.1938 | 0.383781 | 4015.047 | 32.45811 | 0.007443 | 0.00441064 | 2.76E-04   |
| 306 | M-306 | SALI-5(Zr)                        | MOF | [180] | 298 | 0.870559 | 483.1285 | 128.7548 | 0.129441 | 3023.826 | 854.322  | 0        | 1        | 1        | 0.707883 | 0.00816754 | 4.08E-04   |
| 307 | M-307 | SALI-9(Zr)                        | MOF | [180] | 298 | 0.785107 | 425.8059 | 140.4082 | 0.214893 | 2205.144 | 748.5094 | 0        | 1        | 1        | 0.409866 | 0.00720631 | 4.00E-04   |
| 308 | M-308 | SALI-9'(Zr)                       | MOF | [180] | 298 | 0.876307 | 492.3257 | 131.7443 | 0.123693 | 1420.264 | 363.7307 | 0        | 1        | 1        | 0.758279 | 0.00434963 | 1.98E-04   |
| 309 | M-309 | SALI-BA(Zr)                       | MOF | [180] | 298 | 0.496579 | 581.2383 | 133.3765 | 0.143759 | 1901.379 | 558.6194 | 0.359662 | 323.1126 | 69.67271 | 0.984661 | 0.00799793 | 4.21E-04   |
| 310 | M-310 | SIFSIX-14-Cu-i                    | MOF | [213] | 298 | 0.431901 | 3394.729 | 786.6951 | 0.568099 | 7986.518 | 2067.468 | 0        | 1        | 1        | 0.155253 | 0.00191972 | 1.48E-04   |
| 311 | M-311 | SIFSIX-1-Cu                       | MOF | [213] | 298 | 1        | 5666.709 | 1162.962 | 5.28E-13 | 48826.01 | 8146.468 | 0        | 1        | 1        | 0.150846 | 0.00362192 | 2.41E-04   |
| 312 | M-312 | SIFSIX-2-Cu-i                     | MOF | [213] | 298 | 0.398925 | 602.3592 | 125.4379 | 0.601075 | 4045.21  | 1692.344 | 0        | 1        | 1        | 0.24888  | 0.0141204  | 9.41E-04   |
| 313 | M-313 | SIFSIX-3-Ni                       | MOF | [213] | 298 | 0.511637 | 4036.45  | 1101.127 | 0.488363 | 7590.076 | 1651.183 | 0        | 1        | 1        | 0.161107 | 0.00429479 | 2.86E-04   |
| 314 | M-314 | SIM-1                             | MOF | [112] | 298 | 0.876079 | 2589.978 | 1178.642 | 0.01076  | 65711.2  | 103.0298 | 0.113161 | 3816.495 | 23.17886 | 0.131592 | 0.02305409 | 0.00144088 |
| 315 | M-315 | S-MIL-53(Al)                      | MOF | [40]  | 298 | 0.180971 | 659.7659 | 197.7328 | 0.344961 | 2134.581 | 180.5296 | 0.474068 | 281.9265 | 16.34491 | 1.058074 | 0.00470578 | 2.94E-04   |
| 316 | M-316 | SNU-80                            | MOF | [14]  | 298 | 0.489874 | 1018.897 | 576.3313 | 0.510126 | 5310.178 | 1394.158 | 0        | 1        | 1        | 0.009374 | 0.05031222 | 0.00359373 |
| 317 | M-317 | STAM-17(Cu)-Oet                   | MOF | [224] | 298 | 0.502219 | 5311.898 | 2095.945 | 0.497781 | 8385.955 | 214.9846 | 0        | 1        | 1        | 0.14928  | 0.01540725 | 6.42E-04   |
| 318 | M-318 | TAF-1a                            | MOF | [16]  | 298 | 0.661688 | 2125.17  | 869.9973 | 0.338312 | 7356.384 | 1998.595 | 0        | 1        | 1        | 0.01201  | 0.01669351 | 0.00104334 |
| 319 | M-319 | ThrZnOAc                          | MOF | [214] | 298 | 0.850538 | 3590.431 | 242.7135 | 0.149462 | 3269.49  | 1290.109 | 0        | 1        | 1        | 0.15033  | 0.00394372 | 3.29E-04   |
| 320 | M-320 | Ti(pyradine-2-carboxylic acid)    | MOF | [11]  | 298 | 0.412089 | 1205.446 | 213.2038 | 0.107568 | 2242.851 | 135.0045 | 0.480343 | 4324.569 | 917.964  | 0.180256 | 0.02120926 | 0.00132558 |
| 321 | M-321 | TUC-110(Cd)                       | MOF | [230] | 298 | 0.506    | 2859.611 | 941.7649 | 0.494    | 7399.133 | 2150.367 | 0        | 1        | 1        | 0.098072 | 0.00550509 | 2.20E-04   |
| 322 | M-322 | UiO-66                            | MOF | [75]  | 298 | 0.609352 | 2542.912 | 79.2177  | 0.023064 | 6798.648 | 2200.589 | 0.367584 | 3133.564 | 899.0752 | 0.425506 | 0.00439239 | 1.69E-04   |
| 323 | M-323 | UiO-66(Hf)-(OH)2                  | MOF | [167] | 273 | 0.502726 | 2935.445 | 1144.013 | 0.497274 | 8011.228 | 1662.3   | 0        | 1        | 1        | 0.284202 | 0.00796101 | 3.06E-04   |
| 324 | M-324 | UiO-66(Zr)-(C2H5)2                | MOF | [200] | 298 | 0.962837 | 9.47E-05 | 172.964  | 0.777507 | 2580.42  | 1285.282 | 0        | 74948.49 | 105.4182 | 0.175134 | 0.01046799 | 4.76E-04   |
| 325 | M-325 | UiO-66(Zr)-(CF3)2                 | MOF | [200] | 298 | 0.530349 | 2269.567 | 956.4353 | 0.469651 | 2659.431 | 178.613  | 0        | 1        | 1        | 0.182363 | 0.00821527 | 3.42E-04   |
| 326 | M-326 | UiO-66(Zr)-(CH3)2                 | MOF | [200] | 298 | 0.507615 | 1436.711 | 396.2563 | 0.095347 | 8911.998 | 1273.573 | 0.397038 | 3454.164 | 511.0291 | 0.275174 | 0.00230323 | 9.60E-05   |
| 327 | M-327 | UiO-66(Zr)-(COOH)2                | MOF | [5]   | 303 | 0.304515 | 482.9366 | 169.4011 | 0.695485 | 4417.716 | 1790.378 | 0        | 1        | 1        | 0.24748  | 0.01428671 | 0.00142867 |
| 328 | M-328 | UiO-66(Zr)-(OH)2                  | MOF | [167] | 273 | 0.572813 | 3014.195 | 1093.717 | 0.427187 | 7685.855 | 1050.216 | 0        | 1        | 1        | 0.308957 | 0.00741897 | 3.09E-04   |
| 329 | M-329 | UiO-66(Zr)-1,4-Napthyl            | MOF | [193] | 298 | 0.500631 | 1812.277 | 573.3056 | 0.029026 | 8876.233 | 60.83095 | 0.470343 | 4789.8   | 619.4786 | 0.287955 | 0.01699119 | 0.00130701 |
| 330 | M-330 | UiO-66(Zr)-2,5-(oMe)2             | MOF | [193] | 298 | 0.881427 | 3658.677 | 873.2672 | 0.118573 | 9208.459 | 953.4753 | 0        | 1        | 1        | 0.466774 | 0.00202611 | 1.13E-04   |
| 331 | M-331 | UiO-66(Zr)-C2F5                   | MOF | [200] | 298 | 0.360367 | 366.2452 | 160.9424 | 0.103466 | 5861.669 | 1510.152 | 0.536167 | 1694.643 | 422.4785 | 0.240609 | 0.01185242 | 6.97E-04   |
| 332 | M-332 | UiO-66(Zr)-CF3                    | MOF | [200] | 298 | 0.503813 | 2766.147 | 332.5817 | 0.496187 | 2890.063 | 1182.274 | 0        | 1        | 1        | 0.267913 | 0.012038   | 4.15E-04   |
| 333 | M-333 | UiO-66(Zr)-CH3                    | MOF | [207] | 298 | 0.876991 | 2897.709 | 588.6617 | 0.123009 | 5067.306 | 3286.791 | 0        | 1        | 1        | 0.309088 | 0.00747308 | 6.79E-04   |
| 334 | M-334 | UiO-66(Zr)-NH3 <sup>+</sup> 3+Cl- | MOF | [181] | 293 | 0.596734 | 3594.697 | 663.9573 | 0.403266 | 7212.262 | 2376.918 | 0        | 1        | 1        | 0.604926 | 0.00192659 | 1.01E-04   |
| 335 | M-335 | UiO-66(Zr)-NO2                    | MOF | [193] | 298 | 0.731527 | 4526.341 | 1381.286 | 0.268473 | 4516.622 | 254.2    | 0        | 1        | 1        | 0.391304 | 0.0049899  | 3.12E-04   |

|     |       |                                                                              |     |       |     |          |          |          |          |          |          |          |          |          |          |            |            |
|-----|-------|------------------------------------------------------------------------------|-----|-------|-----|----------|----------|----------|----------|----------|----------|----------|----------|----------|----------|------------|------------|
| 336 | M-336 | UiO-66(Zr <sup>4+</sup> ) with high concentration stearic acid               | MOF | [47]  | 298 | 0.387829 | 2890.318 | 128.1624 | 0.478125 | 4581.301 | 2021.578 | 0.134046 | 4116.138 | 29.13452 | 0.52282  | 0.02055129 | 3.21E-04   |
| 337 | M-337 | UiO-66(Zr <sup>4+</sup> ) with metal/ligand ratio 6:3                        | MOF | [47]  | 298 | 0.428496 | 2875.092 | 66.43074 | 0.458954 | 4888.714 | 2098.83  | 0.11255  | 3605.445 | 29.96738 | 0.420137 | 0.03175891 | 5.99E-04   |
| 338 | M-338 | UiO-66D(Zr)                                                                  | MOF | [200] | 298 | 0.47645  | 893.9073 | 119.1353 | 0.048441 | 4615.599 | 1528.09  | 0.475109 | 883.4783 | 18.98614 | 0.33316  | 0.00775528 | 3.53E-04   |
| 339 | M-339 | UiO-66D(Zr)-(CF <sub>3</sub> ) <sub>2</sub>                                  | MOF | [200] | 298 | 0.493219 | 367.2997 | 71.72049 | 0.0136   | 29568.3  | 46.67037 | 0.493182 | 359.2959 | 17.89431 | 0.280178 | 0.00623405 | 2.71E-04   |
| 340 | M-340 | UiO-66-NH <sub>2</sub>                                                       | MOF | [64]  | 298 | 0.517083 | 4380.525 | 400.6071 | 0.482917 | 5589.41  | 2044.634 | 0        | 1        | 1        | 0.384388 | 0.00422706 | 3.25E-04   |
| 341 | M-341 | UiO-67(Zr)                                                                   | MOF | [166] | 298 | 0.540402 | 1761.414 | 90.43108 | 0.108289 | 6392.706 | 1695.509 | 0.351309 | 1874.926 | 508.7158 | 0.284822 | 4.58E-04   | 6.54E-05   |
| 342 | M-342 | UiO-67(Zr)-BIPY                                                              | MOF | [166] | 298 | 0.166954 | 3374.338 | 188.5673 | 0.784811 | 3333.149 | 1813.846 | 0.048235 | 27203.59 | 5852.568 | 0.210456 | 0.02180251 | 0.00311464 |
| 343 | M-343 | UiO-67(Zr)-BN                                                                | MOF | [168] | 303 | 0.126903 | 998.0223 | 592.4379 | 0.028481 | 7179.357 | 30.54931 | 0.844616 | 1545.697 | 14.71387 | 0.493011 | 0.03731303 | 0.00219488 |
| 344 | M-344 | UMCM-1                                                                       | MOF | [64]  | 298 | 0.499287 | 573.3889 | 125.8854 | 0.999998 | 694.8533 | 2029.496 | 0        | 6139.003 | 36.93433 | 0.262395 | 0.0026725  | 8.91E-04   |
| 345 | M-345 | untreated a-Al                                                               | MOF | [114] | 298 | 0.545565 | 3351.159 | 787.3222 | 0.454435 | 9012.839 | 1956.067 | 0        | 1        | 1        | 0.003825 | 0.00297384 | 2.12E-04   |
| 346 | M-346 | untreated m-Al                                                               | MOF | [114] | 298 | 0.465261 | 3002.816 | 1507.113 | 0.010671 | 4304.017 | 169.2416 | 0.524068 | 4514.5   | 28.4181  | 0.009671 | 0.02643508 | 8.53E-04   |
| 347 | M-347 | ValZnCl                                                                      | MOF | [227] | 298 | 0.594207 | 294.2315 | 131.2806 | 0.405793 | 2453.74  | 1119.102 | 0        | 1        | 1        | 0.124496 | 0.01990543 | 0.00124409 |
| 348 | M-348 | ValZnOAc                                                                     | MOF | [214] | 298 | 0.768919 | 611.1979 | 72.2377  | 0.231081 | 3753.314 | 2040.305 | 0        | 1        | 1        | 0.284638 | 0.0062802  | 3.49E-04   |
| 349 | M-349 | Y-fum-fcu-MOF                                                                | MOF | [7]   | 298 | 0.56522  | 4156.195 | 1258.508 | 0.172976 | 5729.898 | 304.3069 | 0.261804 | 6464.649 | 83.5495  | 0.372251 | 0.00541576 | 2.26E-04   |
| 350 | M-350 | Y-shp-MOF-5                                                                  | MOF | [174] | 298 | 0.856175 | 1078.945 | 137.7689 | 0.143825 | 6472.962 | 1354.712 | 0        | 1        | 1        | 0.502226 | 0.00247961 | 1.55E-04   |
| 351 | M-351 | ZIF-412(Zn)                                                                  | MOF | [161] | 298 | 0.820696 | 582.6233 | 110.0614 | 0.179304 | 2737.658 | 1207.38  | 0        | 1        | 1        | 0.071962 | 0.00617102 | 3.43E-04   |
| 352 | M-352 | ZIF-71(Zn)                                                                   | MOF | [209] | 308 | 0.485101 | 1466.007 | 413.4958 | 0.514899 | 7667.267 | 2113.854 | 0        | 1        | 1        | 0.007619 | 0.05903531 | 0.00491961 |
| 353 | M-353 | ZIF-8                                                                        | MOF | [58]  | 298 | 0.386877 | 3.605498 | 671.4135 | 0.005877 | 24280.38 | 34.09344 | 0.607246 | 148.9765 | 25.36475 | 0.140004 | 0.12547041 | 0.0078419  |
| 354 | M-354 | ZIF-8_50-90_50                                                               | MOF | [155] | 308 | 0.520056 | 524.1085 | 45.27914 | 0.470153 | 738.1826 | 68.96281 | 0.00979  | 27373.47 | 432.225  | 0.373885 | 0.0017727  | 5.06E-05   |
| 355 | M-355 | ZIF-8_55-71_45                                                               | MOF | [155] | 308 | 0.64032  | 773.776  | 333.8122 | 0.045613 | 5283.365 | 62.98759 | 0.314067 | 4709.558 | 1068.19  | 0.014188 | 0.04078682 | 0.00509835 |
| 356 | M-356 | ZIF-8_70-90_30                                                               | MOF | [155] | 308 | 0.332585 | 492.7528 | 51.49542 | 0.027251 | 15442.53 | 114.2819 | 0.640163 | 366.6848 | 16.73294 | 0.074435 | 0.00385246 | 2.27E-04   |
| 357 | M-357 | ZIF-90(Zn)                                                                   | MOF | [209] | 308 | 0.150075 | 1039.357 | 373.8904 | 0.849925 | 2695.763 | 162.9264 | 0        | 1        | 1        | 0.332063 | 0.00443987 | 2.47E-04   |
| 358 | M-358 | Zn(BTTB)                                                                     | MOF | [212] | 298 | 0.623584 | 727.4595 | 187.9098 | 0.376416 | 2841.032 | 975.8172 | 0        | 1        | 1        | 0.209057 | 0.01292671 | 8.62E-04   |
| 359 | M-359 | Zn(BTTB)(AZPY)                                                               | MOF | [212] | 298 | 0.547865 | 1749.233 | 471.0811 | 0.452135 | 1514.386 | 117.9161 | 0        | 1        | 1        | 0.190481 | 0.00478803 | 3.42E-04   |
| 360 | M-360 | Zn(BTTB)(BDC)                                                                | MOF | [212] | 298 | 0.398726 | 1021.803 | 284.5386 | 0.068091 | 47861.05 | 91.20061 | 0.533183 | 3597.996 | 1161.4   | 0.089574 | 0.00722661 | 9.03E-04   |
| 361 | M-361 | Zn(BTTB)(BPY)                                                                | MOF | [212] | 298 | 0.500428 | 528.936  | 91.18816 | 0.499572 | 762.1553 | 66.84877 | 0        | 1        | 1        | 0.252617 | 0.00482664 | 2.84E-04   |
| 362 | M-362 | Zn(BTTB)(DMBPY)                                                              | MOF | [201] | 298 | 0.941159 | 424.7759 | 57.12816 | 0.058841 | 2569.625 | 780.3566 | 0        | 1        | 1        | 0.210438 | 0.01138207 | 7.11E-04   |
| 363 | M-363 | Zn(DM)0.5(AT)                                                                | MOF | [232] | 298 | 0.429791 | 1341.784 | 492.4026 | 0.570209 | 7848.846 | 525.2286 | 0        | 1        | 1        | 0.085284 | 0.00869773 | 4.83E-04   |
| 364 | M-364 | Zn(II)-MOF [Zn(HPyImDC)(DMA)] <sub>n</sub>                                   | MOF | #N/A  | 298 | 0.507281 | 1884.824 | 945.2224 | 0.492719 | 8797.816 | 2746.489 | 0        | 1        | 1        | 0.064361 | 0.02076277 | 8.31E-04   |
| 365 | M-365 | Zn(L)(tdca)*1.5DMF                                                           | MOF | [119] | 298 | 0.499966 | 4088.22  | 616.9256 | 0.4867   | 6576.537 | 1904.097 | 0.013334 | 28676.39 | 40.25674 | 0.068253 | 0.00941698 | 5.23E-04   |
| 366 | M-366 | Zn(NDI-H)                                                                    | MOF | [110] | 293 | 0.816913 | 2001.684 | 86.46705 | 0.183087 | 2044.068 | 766.6184 | 0        | 1        | 1        | 0.427152 | 0.00276507 | 2.51E-04   |
| 367 | M-367 | Zn(NDI-NHEt)                                                                 | MOF | [110] | 293 | 0.407534 | 2005.041 | 732.101  | 0.592466 | 1936.2   | 54.70427 | 0        | 1        | 1        | 0.290714 | 0.00744827 | 4.66E-04   |
| 368 | M-368 | Zn(NDI-SEt)                                                                  | MOF | [112] | 293 | 0.438776 | 1273.661 | 477.548  | 0.304453 | 3642     | 245.1882 | 0.25677  | 6475.792 | 1477.958 | 0.283436 | 0.01011043 | 4.60E-04   |
| 369 | M-369 | Zn(NDI-SO <sub>2</sub> Et)                                                   | MOF | [112] | 293 | 0.566983 | 2776.583 | 1162.496 | 0.433017 | 2579.297 | 195.028  | 0        | 1        | 1        | 0.214494 | 0.00978313 | 5.44E-04   |
| 370 | M-370 | Zn(NDI-SOEt)                                                                 | MOF | [112] | 293 | 0.438776 | 1273.661 | 477.548  | 0.304453 | 3642     | 245.1882 | 0.25677  | 6475.792 | 1477.958 | 0.283436 | 0.01011043 | 4.60E-04   |
| 371 | M-371 | Zn(NO <sub>3</sub> ) <sub>2</sub> *6H <sub>2</sub> O                         | MOF | [12]  | 293 | 0.985361 | 6524.086 | 1352.529 | 0.014639 | 91592.69 | 1.72E+14 | 0        | 1        | 1        | 0.165408 | 0.00432446 | 6.18E-04   |
| 372 | M-372 | Zn <sub>2</sub> (bptc)                                                       | MOF | [225] | 298 | 0.242704 | 2274.707 | 188.4351 | 0.757296 | 4533.692 | 643.3204 | 0        | 1        | 1        | 0.1519   | 0.00521929 | 2.27E-04   |
| 373 | M-373 | Zn <sub>2</sub> C <sub>14</sub> N <sub>2</sub> O <sub>8</sub> H <sub>4</sub> | MOF | [66]  | 298 | 0.644464 | 4614.064 | 540.5646 | 0.343052 | 2338.016 | 312.1533 | 0.012484 | 13056.81 | 60.46827 | 0.178903 | 0.00580891 | 2.77E-04   |
| 374 | M-374 | Zn <sub>2</sub> Co <sub>3</sub> (MFU-4l)                                     | MOF | [184] | 298 | 0.868554 | 2229.267 | 36.12001 | 0.131446 | 1539.829 | 870.8675 | 0        | 1        | 1        | 1.078923 | 0.00268569 | 2.07E-04   |
| 375 | M-375 | Zn <sub>3</sub> (TCPB) <sub>2</sub> (H <sub>2</sub> O) <sub>2</sub>          | MOF | [108] | 298 | 0.505488 | 358.5125 | 254.6445 | 0.494512 | 3893.094 | 1472.996 | 0        | 1        | 1        | 0.080967 | 0.04515646 | 0.00282228 |
| 376 | M-376 | Zn <sub>3</sub> Co <sub>2</sub> (MFU-4l)                                     | MOF | [184] | 298 | 0.498693 | 1960.296 | 75.84075 | 0.088647 | 1956.18  | 1134.933 | 0.41266  | 1912.625 | 37.0963  | 0.933303 | 0.00319145 | 2.90E-04   |
| 377 | M-377 | Zn <sub>3</sub> L <sub>2</sub>                                               | MOF | [220] | 298 | 0.819108 | 1709.701 | 512.0237 | 0.180892 | 7356.975 | 2903.214 | 0        | 1        | 1        | 0.197481 | 0.01191099 | 7.44E-04   |
| 378 | M-378 | Zn <sub>4</sub> O(dmcapz) <sub>3</sub>                                       | MOF | [72]  | 298 | 0.501181 | 401.6259 | 311.0816 | 0.498819 | 498.5091 | 86.04612 | 0        | 1        | 1        | 0.386253 | 0.03468625 | 8.89E-04   |



|     |       |                    |     |       |       |          |          |          |          |          |          |          |          |          |          |            |            |
|-----|-------|--------------------|-----|-------|-------|----------|----------|----------|----------|----------|----------|----------|----------|----------|----------|------------|------------|
| 379 | M-379 | Zn5(MFU-4I)        | MOF | [184] | 298   | 0.690055 | 1045.504 | 59.92128 | 0.309945 | 1017.364 | 3.271531 | 0        | 1        | 1        | 1.04     | 0.00514324 | 4.29E-04   |
| 380 | M-380 | Zn-BTTB-DMBPY      | MOF | [84]  | 298   | 0.937923 | 535.0298 | 10.87049 | 0.062077 | 2611.036 | 1023.103 | 0        | 1        | 1        | 0.212146 | 2.12E-04   | 3.54E-05   |
| 381 | M-381 | ZnCo4(MFU-4I)      | MOF | [184] | 298   | 0.500988 | 788.9504 | 196.9154 | 0.416848 | 2768.105 | 93.40769 | 0.082164 | 38750.37 | 16949.77 | 0.733665 | 0.00695068 | 6.32E-04   |
| 382 | M-382 | Zn-MOF-74(cycle 1) | MOF | [49]  | 298   | 0.248079 | 2335.718 | 778.4186 | 0.094536 | 14127.16 | 36.30765 | 0.657384 | 9894.046 | 2235.856 | 0.304731 | 0.01754745 | 6.75E-04   |
| 383 | M-383 | Zn-Trimesate       | MOF | [221] | 303   | 0.509155 | 3659.72  | 2045.334 | 0.490845 | 10926.03 | 2179.467 | 0        | 1        | 1        | 0.191241 | 0.01591952 | 8.84E-04   |
| 384 | M-384 | Zr-Fum HT          | MOF | [242] | 303   | 0.501892 | 4898.313 | 1644.63  | 0.019614 | 13858.06 | 95.52634 | 0.478494 | 5736.287 | 251.4275 | 0.421503 | 0.00952017 | 4.33E-04   |
| 385 | M-385 | Zr-MOF-801-P       | MOF | [75]  | 298   | 0.506838 | 4461.036 | 1482.833 | 0.493162 | 6298.696 | 258.8384 | 0        | 1        | 1        | 0.353338 | 0.00571732 | 2.60E-04   |
| 386 | M-386 | Zr-MOF-801-SC      | MOF | [75]  | 298   | 0.496899 | 6060.586 | 180.8317 | 0.503101 | 3248.116 | 964.524  | 0        | 1        | 1        | 0.277296 | 0.00584813 | 3.66E-04   |
| 387 | M-387 | Zr-MOF-802         | MOF | [75]  | 298   | 0.539938 | 2232.916 | 923.7017 | 0.460062 | 7002.563 | 1567.614 | 0        | 1        | 1        | 0.085072 | 0.0106349  | 5.60E-04   |
| 388 | M-388 | Zr-MOF-804         | MOF | [75]  | 298   | 0.695395 | 2239.42  | 119.5774 | 0.247545 | 2475.471 | 1064.086 | 0.05706  | 12721.92 | 2336.141 | 0.339164 | 0.01684772 | 8.02E-04   |
| 389 | M-389 | Zr-MOF-805         | MOF | [75]  | 298   | 0.504792 | 2433.999 | 411.5314 | 0.172137 | 2990.924 | 72.41521 | 0.323072 | 3462.959 | 1297.696 | 0.332925 | 0.00363472 | 1.73E-04   |
| 390 | M-390 | Zr-MOF-806         | MOF | [75]  | 298   | 0.504591 | 3116.499 | 986.3802 | 0.495409 | 7906.258 | 1333.443 | 0        | 1        | 1        | 0.266152 | 0.01269104 | 5.08E-04   |
| 391 | M-391 | Zr-MOF-808         | MOF | [75]  | 298   | 0.494796 | 2864.039 | 126.8056 | 0.182665 | 4284.108 | 3294.859 | 0.322539 | 2692.613 | 29.19263 | 0.572069 | 0.01288774 | 4.77E-04   |
| 392 | M-392 | Zr-MOF-841         | MOF | [75]  | 298   | 0.339695 | 3016.221 | 645.8683 | 0.660305 | 3445.717 | 15.97044 | 0        | 1        | 1        | 0.48299  | 0.02876344 | 0.00136969 |
| 393 | C-1   | 2,5-DhaTab         | COF | [135] | 298   | 0.097381 | 1566.607 | 745.6322 | 0.902619 | 512.335  | 45.08477 | 0        | 1        | 1        | 0.567901 | 0.00388094 | 2.16E-04   |
| 394 | C-2   | 2,3-DhaTph         | COF | [135] | 298   | 0.547371 | 915.8813 | 384.4404 | 0.452629 | 3581.024 | 917.427  | 0        | 1        | 1        | 0.144552 | 0.02149095 | 0.00143273 |
| 395 | C-3   | 2,5-DhaTph         | COF | [135] | 298   | 0.837135 | 994.4528 | 97.88871 | 0.162865 | 691.8936 | 2295.39  | 0        | 1        | 1        | 0.16939  | 0.01244947 | 8.30E-04   |
| 396 | C-4   | AB-COF             | COF | [133] | 298   | 0.681521 | 3361.615 | 63.35843 | 0.318479 | 3012.831 | 539.7694 | 0        | 1        | 1        | 0.347584 | 0.00517381 | 1.67E-04   |
| 397 | C-5   | Ad2L1              | COF | [140] | 293   | 0.497577 | 386.2955 | 48.09814 | 0.502423 | 924.1279 | 333.8558 | 0        | 1        | 1        | 0.279405 | 0.05356133 | 0.00111586 |
| 398 | C-6   | Ad2L2              | COF | [140] | 293   | 0.618822 | 477.4786 | 111.1531 | 0.381178 | 1439.428 | 564.5594 | 0        | 1        | 1        | 0.14943  | 0.04424278 | 0.00119575 |
| 399 | C-7   | Ad2L3              | COF | [140] | 293   | 0.609821 | 537.8645 | 127.6498 | 0.132817 | 3683.9   | 947.1684 | 0.257362 | 1243.038 | 220.6713 | 0.229107 | 0.01266511 | 2.81E-04   |
| 400 | C-8   | Ad3L1              | COF | [140] | 293   | 0.645825 | 563.8632 | 108.6725 | 0.268967 | 1124.015 | 167.518  | 0.085208 | 2955.58  | 715.4997 | 0.415802 | 0.00538049 | 1.25E-04   |
| 401 | C-9   | Ad3L2              | COF | [140] | 293   | 0.620702 | 446.2351 | 79.66079 | 0.379298 | 1096.919 | 341.9286 | 0        | 1        | 1        | 0.374514 | 0.03720836 | 8.65E-04   |
| 402 | C-10  | Ad3L3              | COF | [140] | 293   | 0.507137 | 552.5921 | 84.4648  | 0.492863 | 1019.82  | 280.9918 | 0        | 1        | 1        | 0.545552 | 0.02360688 | 4.14E-04   |
| 403 | C-11  | Ad4L1              | COF | [140] | 293   | 0.887182 | 1211.685 | 312.8256 | 0.112818 | 3557.648 | 846.3142 | 0        | 1        | 1        | 0.447004 | 0.00868395 | 1.50E-04   |
| 404 | C-12  | Ad4L2              | COF | [140] | 293   | 0.501524 | 481.3115 | 86.57941 | 0.498476 | 870.4368 | 250.8065 | 0        | 1        | 1        | 0.686162 | 0.02750222 | 3.99E-04   |
| 405 | C-13  | Ad4L3              | COF | [140] | 293   | 0.834413 | 1416.01  | 364.4511 | 0.116752 | 4318.374 | 1096.1   | 0.048835 | 479.5628 | 53.94949 | 0.522857 | 0.00310065 | 5.96E-05   |
| 406 | C-14  | ATFG-COF           | COF | [133] | 298   | 0.367549 | 322.9185 | 136.5887 | 0.632451 | 3967.628 | 1197.45  | 0        | 1        | 1        | 0.290484 | 0.01701856 | 4.86E-04   |
| 407 | C-15  | bipy -CTF500       | COF | [138] | 298   | 0.500448 | 1972.095 | 655.1905 | 0.499552 | 3581.488 | 1369.043 | 0        | 1        | 1        | 0.422224 | 0.02337568 | 3.65E-04   |
| 408 | C-16  | bpim -CTF -300     | COF | [142] | 298   | 0.505268 | 1170.08  | 663.672  | 0.251719 | 167.4877 | 56.2371  | 0.243013 | 6070.865 | 1042.515 | 0.153404 | 0.05440536 | 7.56E-04   |
| 409 | C-17  | bpim -CTF -400     | COF | [142] | 298   | 0.504849 | 2306.9   | 979.0922 | 0.495151 | 4723.95  | 2068.517 | 0        | 1        | 1        | 0.300465 | 0.04082749 | 3.14E-04   |
| 410 | C-18  | bpim -CTF -500     | COF | [142] | 298   | 0.734716 | 1945.152 | 523.0528 | 0.265284 | 3166.627 | 2222.782 | 0        | 1        | 1        | 0.486059 | 0.02156582 | 2.25E-04   |
| 411 | C-19  | CE-1               | COF | [137] | 293   | 0.511117 | 599.1868 | 158.7074 | 0.488883 | 2276.583 | 930.4716 | 0        | 1        | 1        | 0.267784 | 0.02292345 | 0.00163739 |
| 412 | C-20  | CE-2               | COF | [137] | 293   | 0.50187  | 1118.955 | 313.5736 | 0.49813  | 3572.46  | 1469     | 0        | 1        | 1        | 0.066125 | 0.01678645 | 0.00119903 |
| 413 | C-21  | CE-3               | COF | [137] | 293   | 0.518177 | 1147.807 | 303.0739 | 0.481823 | 2978.738 | 1304.4   | 0        | 1        | 1        | 0.069853 | 0.01844045 | 0.00131718 |
| 414 | C-22  | COF-432            | COF | [244] | 298   | 0.318342 | 1427.349 | 720.1676 | 0.681658 | 2636.028 | 32.64642 | 0        | 1        | 1        | 0.289395 | 0.00544728 | 2.48E-04   |
| 415 | C-23  | CTF-a              | COF | [139] | 292.5 | 0.504674 | 869.4397 | 139.6679 | 0.495326 | 1150.113 | 472.6623 | 0        | 1        | 1        | 1.313891 | 0.01680125 | 3.43E-04   |
| 416 | C-24  | CTF-b              | COF | [139] | 292.5 | 0.822395 | 2168.86  | 712.633  | 0.177605 | 6044.253 | 1074.53  | 0        | 1        | 1        | 0.541573 | 0.00952645 | 2.98E-04   |
| 417 | C-25  | CTF-c              | COF | [139] | 292.5 | 0.498085 | 1259.645 | 288.1291 | 0.501915 | 1944.77  | 762.9849 | 0        | 1        | 1        | 0.869319 | 0.01453854 | 4.15E-04   |
| 418 | C-26  | CTF-d              | COF | [140] | 292.5 | 0.592695 | 618.9742 | 216.5458 | 0.070502 | 2791.944 | 495.8614 | 0.336803 | 338.4606 | 32.05491 | 0.726657 | 0.02696523 | 8.17E-04   |
| 419 | C-27  | DCBP -CTF - 1      | COF | [143] | 293   | 0.508802 | 880.9977 | 214.7088 | 0.206646 | 1926.34  | 702.2331 | 0.284551 | 335.5909 | 27.93984 | 0.49843  | 0.01077566 | 1.71E-04   |
| 420 | C-28  | F -DCBP -CTF - 1   | COF | [143] | 293   | 0.496482 | 339.8585 | 84.65792 | 0.415297 | 1288.885 | 450.8813 | 0.088221 | 3802.596 | 861.4808 | 0.192556 | 0.07550609 | 0.00279652 |
| 421 | C-29  | MM1                | COF | [141] | 293   | 0.505477 | 1033.195 | 235.1752 | 0.289609 | 1972.942 | 591.979  | 0.204913 | 568.929  | 87.22596 | 0.493741 | 0.00687421 | 1.81E-04   |

|     |      |                                                                                            |         |       |     |          |          |          |          |          |          |          |          |          |          |            |            |
|-----|------|--------------------------------------------------------------------------------------------|---------|-------|-----|----------|----------|----------|----------|----------|----------|----------|----------|----------|----------|------------|------------|
| 422 | C-30 | MM2                                                                                        | COF     | [141] | 293 | 0.725247 | 1922.253 | 629.5268 | 0.211499 | 4411.921 | 1610.25  | 0.063254 | 2356.408 | 63.01398 | 0.419974 | 0.00862063 | 2.61E-04   |
| 423 | C-31 | MM3                                                                                        | COF     | [141] | 293 | 0.606634 | 721.6107 | 165.2136 | 0.104894 | 1901.395 | 446.6941 | 0.288472 | 453.6314 | 56.58749 | 0.753041 | 0.00650856 | 1.45E-04   |
| 424 | C-32 | MM4                                                                                        | COF     | [141] | 293 | 0.082199 | 5020.221 | 1124.864 | 0.917801 | 1424.182 | 460.6111 | 0        | 1        | 1        | 0.371208 | 0.01024817 | 3.11E-04   |
| 425 | C-33 | pym-CTF500                                                                                 | COF     | [138] | 298 | 0.391001 | 1489.865 | 679.6906 | 0.608999 | 7853.384 | 2917.171 | 0        | 1        | 1        | 0.210234 | 0.03849364 | 6.01E-04   |
| 426 | C-34 | TPAnq                                                                                      | COF     | [136] | 298 | 0.642224 | 1850.638 | 932.9408 | 0.043538 | 3234.226 | 69.29447 | 0.314238 | 2591.731 | 29.4195  | 0.3565   | 0.01732093 | 0.00144341 |
| 427 | C-35 | TP-Azo                                                                                     | COF     | [135] | 298 | 0.500414 | 974.5745 | 341.9585 | 0.354917 | 1430.138 | 48.70908 | 0.144669 | 2843.705 | 911.2126 | 0.394341 | 0.00629376 | 5.72E-04   |
| 428 | C-36 | TP-Azo                                                                                     | COF     | [136] | 298 | 0.606939 | 1240.382 | 406.9566 | 0.393061 | 1424.388 | 79.33931 | 0        | 1        | 1        | 0.394341 | 0.02187967 | 0.00145864 |
| 429 | C-37 | TPBD                                                                                       | COF     | [135] | 298 | 0.499158 | 1977.516 | 1181.988 | 0.500842 | 1864.832 | 85.13109 | 0        | 1        | 1        | 0.133563 | 0.01910326 | 0.00127355 |
| 430 | C-38 | TPBD                                                                                       | COF     | [136] | 298 | 0.506635 | 1192.139 | 677.1365 | 0.493365 | 1965.686 | 132.3464 | 0        | 1        | 1        | 0.133563 | 0.01831041 | 0.00122069 |
| 431 | C-39 | TPBD-(NO <sub>2</sub> ) <sub>2</sub>                                                       | COF     | [135] | 298 | 0.502913 | 1318.535 | 269.126  | 0.497087 | 2185.923 | 1358.432 | 0        | 1        | 1        | 0.078553 | 0.01883444 | 0.00117715 |
| 432 | C-40 | TPBD-(NO <sub>2</sub> ) <sub>2</sub>                                                       | COF     | [136] | 298 | 0.331444 | 630.0225 | 225.7134 | 0.30281  | 2607.866 | 19.74372 | 0.365746 | 2219.427 | 861.162  | 0.078553 | 0.01071439 | 8.93E-04   |
| 433 | C-41 | TPBD-(OMe) <sub>2</sub>                                                                    | COF     | [135] | 298 | 0.845741 | 1318.981 | 392.9424 | 0.154259 | 4340.698 | 1398.792 | 0        | 1        | 1        | 0.13026  | 0.01082577 | 7.22E-04   |
| 434 | C-42 | TPBD-(OMe) <sub>2</sub>                                                                    | COF     | [136] | 298 | 0.979023 | 1325.062 | 450.04   | 0.020977 | 6736.508 | 445.1613 | 0        | 1        | 1        | 0.13026  | 0.02868125 | 0.00191208 |
| 435 | C-43 | TPBD-Me <sub>2</sub>                                                                       | COF     | [135] | 298 | 0.845741 | 1318.981 | 392.9424 | 0.154259 | 4340.698 | 1398.792 | 0        | 1        | 1        | 0.13026  | 0.01082577 | 7.22E-04   |
| 436 | C-44 | TPBD-Me <sub>2</sub>                                                                       | COF     | [136] | 298 | 0.827992 | 1252.969 | 514.2285 | 0.172008 | 1696.073 | 39.69077 | 0        | 1        | 1        | 0.13026  | 0.01968716 | 0.00131248 |
| 437 | C-45 | TPBpy                                                                                      | COF     | [136] | 298 | 0.349302 | 1613.412 | 594.0984 | 0.650698 | 2183.442 | 99.77114 | 0        | 1        | 1        | 0.76505  | 0.00234467 | 1.56E-04   |
| 438 | C-46 | TPHZ                                                                                       | COF     | [245] | 298 | 0.506901 | 3442.974 | 364.2581 | 0.493099 | 2836.812 | 1565.033 | 0        | 1        | 1        | 0.391853 | 0.016265   | 9.04E-04   |
| 439 | C-47 | TPPa-1                                                                                     | COF     | [135] | 298 | 0.628114 | 2706.175 | 1232.613 | 0.371886 | 4031.365 | 22.97711 | 0        | 1        | 1        | 0.41232  | 0.01366714 | 0.00105132 |
| 440 | C-48 | TPPa-1*                                                                                    | COF     | [136] | 298 | 0.451068 | 635.3058 | 218.1973 | 0.548932 | 3643.702 | 509.6672 | 0        | 1        | 1        | 0.41232  | 0.01572563 | 0.00104838 |
| 441 | C-49 | TPPa-2                                                                                     | COF     | [135] | 298 | 0.899988 | 2109.976 | 1045.081 | 0.100012 | 2907.45  | 60.12731 | 0        | 1        | 1        | 0.202156 | 0.0273045  | 0.00170653 |
| 442 | C-50 | TPPa-2*                                                                                    | COF     | [136] | 298 | 0.294951 | 784.3398 | 228.3629 | 0.705049 | 3177.031 | 703.9923 | 0        | 1        | 1        | 0.202156 | 0.00595121 | 3.97E-04   |
| 443 | C-51 | TPPa-F <sub>4</sub>                                                                        | COF     | [135] | 298 | 0.178853 | 2025.356 | 872.9894 | 0.821147 | 1060.011 | 136.7955 | 0        | 1        | 1        | 0.179023 | 0.0028341  | 1.89E-04   |
| 444 | C-52 | TPPa-NO <sub>2</sub>                                                                       | COF     | [135] | 298 | 0.178853 | 2025.356 | 872.9894 | 0.821147 | 1060.011 | 136.7955 | 0        | 1        | 1        | 0.179023 | 0.0028341  | 1.89E-04   |
| 445 | C-53 | TPPa-NO <sub>2</sub>                                                                       | COF     | [136] | 298 | 0.48326  | 787.5587 | 262.9427 | 0.51674  | 4001.624 | 664.6495 | 0        | 1        | 1        | 0.179023 | 0.00952487 | 6.35E-04   |
| 446 | C-54 | TPTph                                                                                      | COF     | [136] | 298 | 0.161812 | 1684.692 | 1436.232 | 0.838188 | 1143.002 | 151.763  | 0        | 1        | 1        | 0.327808 | 0.00487247 | 3.25E-04   |
| 447 | C-55 | TPTta                                                                                      | COF     | [136] | 298 | 0.457327 | 551.9909 | 132.6649 | 0.542673 | 2962.693 | 782.2186 | 0        | 1        | 1        | 0.334507 | 0.00798899 | 5.33E-04   |
| 448 | C-56 | trzn-COF                                                                                   | COF     | [134] | 298 | 0.50475  | 860.4851 | 384.5944 | 0.49525  | 3956.809 | 1517.122 | 0        | 1        | 1        | 0.068892 | 0.03098193 | 6.74E-04   |
| 449 | Z-1  | CBV-901                                                                                    | Zeolite | [77]  | 294 | 0.312592 | 3317.455 | 102.0243 | 0.687408 | 7485.203 | 2008.658 | 0        | 1        | 1        | 1.21E-05 | 0.01400746 | 0.00200107 |
| 450 | Z-2  | H <sub>0.34</sub> Na <sub>0.06</sub> Al <sub>10.4</sub> Si <sub>47.6</sub> O <sub>96</sub> | Zeolite | [21]  | 298 | 0.506298 | 1536.745 | 487.5242 | 0.493702 | 4866.792 | 1000.129 | 0        | 1        | 1        | 0.153272 | 0.0058525  | 5.85E-04   |
| 451 | Z-3  | HiSiv 3000 Zeolite                                                                         | Zeolite | [76]  | 293 | 0.507345 | 3117.671 | 872.903  | 0.492655 | 8183.668 | 2936.886 | 0        | 1        | 1        | 0.030593 | 0.01136684 | 7.58E-04   |
| 452 | Z-4  | K <sub>6</sub> Na <sub>6</sub> Al <sub>11</sub> O <sub>48</sub>                            | Zeolite | [21]  | 298 | 0.668746 | 13322.04 | 4495.86  | 0.331254 | 12024.44 | 16.3652  | 0        | 1        | 1        | 0.259865 | 0.16826934 | 0.01051683 |
| 453 | Z-5  | MCM-41                                                                                     | Zeolite | [50]  | 298 | 0.7702   | 771.5722 | 108.0828 | 0.2298   | 2425.47  | 1261.032 | 0        | 1        | 1        | 0.560662 | 0.00851225 | 0.00106403 |
| 454 | Z-6  | NaX                                                                                        | Zeolite | [128] | 298 | 0.320478 | 5676.816 | 2530.857 | 0.679522 | 14229.34 | 1022.596 | 0        | 1        | 1        | 0.331483 | 0.00206617 | 1.29E-04   |
| 455 | Z-7  | Na-ZSM-5                                                                                   | Zeolite | [50]  | 298 | 0.248079 | 2335.718 | 778.4186 | 0.094536 | 14127.16 | 36.30765 | 0.657384 | 9894.046 | 2235.856 | 0.304731 | 0.01754745 | 6.75E-04   |
| 456 | Z-8  | Zeolite 13X                                                                                | Zeolite | [43]  | 298 | 0.296552 | 4649.157 | 1951.07  | 0.703448 | 5804.545 | 304.662  | 0        | 1        | 1        | 0.320663 | 0.23781279 | 0.01080967 |
| 457 | Z-9  | Zeolite 4A                                                                                 | Zeolite | [79]  | 298 | 0.50418  | 7411.187 | 2067.505 | 0.49582  | 16069.26 | 1934.26  | 0        | 1        | 1        | 0.286452 | 0.0024327  | 1.87E-04   |
| 458 | Z-10 | Zeolite Na-A                                                                               | Zeolite | [121] | 298 | 0.497849 | 7178.515 | 1488.82  | 0.502151 | 9281.592 | 111.5377 | 0        | 1        | 1        | 0.253694 | 0.03041288 | 0.00304129 |
| 459 | Z-11 | Zn <sub>2</sub> (pbc) <sub>2</sub> *H <sub>2</sub> ma*H <sub>3</sub> O*2H <sub>2</sub> O   | Zeolite | [9]   | 298 | 0.727554 | 3107.02  | 1298.294 | 0.250151 | 8283.224 | 679.561  | 0.022295 | 17390.28 | 24.27352 | 0.147544 | 0.00841441 | 0.0021036  |
| 460 | Z-12 | ZSM-5                                                                                      | Zeolite | [65]  | 298 | 0.524857 | 2341.584 | 363.3627 | 0.475143 | 5047.698 | 1523.547 | 0        | 1        | 1        | 0.01095  | 0.01631197 | 0.0016312  |

Chi-square ( $\chi^2$ ) and reduced chi-square ( $\chi^2/\nu$ ) are statistical indicators that commonly used to judge the goodness of curve fitting. According to the rule of thumb, a "good" fitting has  $\chi^2/\nu$  less than 1, and smaller  $\chi^2$  usually means smaller fitting error with the reasonable fitting parameters.

We conducted chi-square goodness-of-fit test1 for each fitting, and provided statistical indicators including the chi-square ( $\chi^2$ ) and reduced chi-square ( $\chi^2/\nu$ ) that commonly used to judge the goodness of curve fitting in Table S1. According to the rule of thumb, a "good"

fitting has  $\chi^2$  less than 1, and smaller  $\chi^2$  usually means smaller fitting error with the reasonable fitting parameters. 2-3 All adsorption isotherms fitted in our study ( $\chi^2 < 0.03$ ) has decent fitting. Concretely, their formulas are  $\chi^2 = \sum_i N r_i^2$  and  $\chi^2 = \chi^2 / (N - N_{\text{vars}})$ . Where,  $r$  is the residual array returned by the objective function (likely to be (data-model)/uncertainty for data modelling usages),  $N$  is the number of data points, and  $N_{\text{vars}}$  is number of variable parameters. 4

|   |                                                                                                                                                                                                                 |
|---|-----------------------------------------------------------------------------------------------------------------------------------------------------------------------------------------------------------------|
| 1 | Cochran, W. G., The $\chi^2$ test of goodness of fit. The Annals of Mathematical Statistics 1952, 23 (3), 315-345.                                                                                              |
| 2 | Chi-square: testing for goodness of fit. <a href="http://maxwell.ucsc.edu/~drip/133/ch4.pdf">http://maxwell.ucsc.edu/~drip/133/ch4.pdf</a> .                                                                    |
| 3 | Chi square distribution (X2) and least squares fitting. <a href="https://www.asc.ohio-state.edu/gan.1/teaching/spring04/Chapter6.pdf">https://www.asc.ohio-state.edu/gan.1/teaching/spring04/Chapter6.pdf</a> . |
| 4 | LMFIT: Non-Linear Least-Squares Minimization and Curve-Fitting for Python. <a href="https://lmfit.github.io/lmfit-py/">https://lmfit.github.io/lmfit-py/</a> .                                                  |

**Table S3.** The structural characteristics, isotherm features and cooling performance of 460 adsorbents

| No. | ID No. | Adsorbent                                     | Species | Ref. No. | Sa (m <sup>2</sup> /g) | Notes | Va (cm <sup>3</sup> /g) | Notes | Dp (Å) | Notes | Wsat (g/g)  | alpha | KH (mol/(kg Pa)) | SCE (kJ/kg) | COPc     |
|-----|--------|-----------------------------------------------|---------|----------|------------------------|-------|-------------------------|-------|--------|-------|-------------|-------|------------------|-------------|----------|
| 1   | M-1    | [(Ni(L6)2)4H2O]n                              | MOF     | [229]    | n.d.                   | n.d.  | n.d.                    | n.d.  | n.d.   | n.d.  | 0.118848812 | 0.15  | 0.002038923      | 244.391545  | 0.684779 |
| 2   | M-2    | (H2dab)[Zn2(ox)3]                             | MOF     | [71]     | n.d.                   | n.d.  | n.d.                    | n.d.  | n.d.   | n.d.  | 0.234775319 | 0.75  | 0.01634968       | 91.90013099 | 0.49548  |
| 3   | M-3    | [{Zn(L)(H2O)2}(NO3)2*2H2O]n                   | MOF     | [4]      | n.d.                   | n.d.  | n.d.                    | n.d.  | n.d.   | n.d.  | 0.108095778 | 0.45  | 0.000614281      | 34.99503361 | 0.335109 |
| 4   | M-4    | [Cd(L'1)(Cl)](H2O)                            | MOF     | [206]    | n.d.                   | n.d.  | n.d.                    | n.d.  | n.d.   | n.d.  | 0.408752142 | 0.85  | 1.39E-08         | 1.782178078 | 0.026616 |
| 5   | M-5    | [Cd(L'2)(Cl)](H2O)                            | MOF     | [206]    | n.d.                   | n.d.  | n.d.                    | n.d.  | n.d.   | n.d.  | 0.096180068 | 0.15  | 0.004260882      | 189.1566586 | 0.64594  |
| 6   | M-6    | [Cd(L'2)2(Br)2](H2O)3                         | MOF     | [206]    | n.d.                   | n.d.  | n.d.                    | n.d.  | n.d.   | n.d.  | 0.033113269 | 0.05  | 0.00166598       | 32.13181146 | 0.31271  |
| 7   | M-7    | [Cd(L'3)(Cl)](H2O)2                           | MOF     | [206]    | n.d.                   | n.d.  | n.d.                    | n.d.  | n.d.   | n.d.  | 0.10407219  | 0.15  | 0.003212751      | 202.1890104 | 0.663299 |
| 8   | M-8    | [Cd(mpto)2.CH3CH2OH]n                         | MOF     | [24]     | 25.8                   | s1    | n.d.                    | n.d.  | n.d.   | n.d.  | 0.003130305 | 0.55  | 4.00E-05         | 0.328357983 | 0.005015 |
| 9   | M-9    | [Co(L)(PIN)]dioxane                           | MOF     | [222]    | 244                    | s1    | n.d.                    | n.d.  | n.d.   | n.d.  | 0.173415552 | 0.45  | 0.001586381      | 38.64672411 | 0.354834 |
| 10  | M-10   | [Co2(BDC)2(BPNO)]*H2BDC*2MeOH                 | MOF     | [19]     | n.d.                   | n.d.  | n.d.                    | n.d.  | 5.8    | d2    | 0.080739885 | 0.05  | 0.00547091       | 53.17553037 | 0.386808 |
| 11  | M-11   | [Co3(ndc)-(HCOO)3(mu3-OH)(H2O)]n              | MOF     | [15]     | 1386                   | s1    | 0.58                    | v1    | 13.6   | d2    | 0.241479318 | 0.15  | 0.006215665      | 404.7922898 | 0.750943 |
| 12  | M-12   | [Co4L3(u3-OH)(H2O)3](SO4)0.5                  | MOF     | [210]    | n.d.                   | n.d.  | n.d.                    | n.d.  | 18     | d1    | 0.193959876 | 0.05  | 0.00690667       | 387.0751406 | 0.719742 |
| 13  | M-13   | [Cu(INA)2(NH3)2(H2O)2]                        | MOF     | [36]     | n.d.                   | n.d.  | n.d.                    | n.d.  | n.d.   | n.d.  | 0.021940066 | 0.75  | 0.000380002      | 16.2645392  | 0.194844 |
| 14  | M-14   | [Cu(INA)2]                                    | MOF     | [36]     | 164.4                  | s1    | n.d.                    | n.d.  | 4.99   | d2    | 0.066652985 | 0.55  | 0.001954751      | 50.21096296 | 0.407579 |
| 15  | M-15   | [Cu(INAIP)]*2H2O                              | MOF     | [93]     | n.d.                   | n.d.  | n.d.                    | n.d.  | n.d.   | n.d.  | 0.133665825 | 0.05  | 0.010385545      | 269.3413181 | 0.661989 |
| 16  | M-16   | [Cu2(H2btp)(H2O)2(12-bis(4-pyridyl)ethylene)] | MOF     | [115]    | 2.8                    | s1    | 0.095                   | v1    | 13.4   | d2    | 0.091300699 | 0.05  | 0.007084607      | 103.8410682 | 0.546155 |
| 17  | M-17   | [Cu2(H2btp)(H2O)2(13-bis(4-pyridyl)propane)]  | MOF     | [115]    | 3                      | s1    | 0.083                   | v1    | 14     | d2    | 0.068456308 | 0.05  | 0.005550609      | 88.8935706  | 0.515441 |
| 18  | M-18   | [Cu2(H2btp)(H2O)2(bipyridine)]                | MOF     | [115]    | 1.1                    | s1    | 0.047                   | v1    | 11.2   | d2    | 0.046107966 | 0.05  | 0.002687605      | 67.76960875 | 0.464619 |
| 19  | M-19   | [Cu2(pzdc)2(pyz)]*2H2O                        | MOF     | [30]     | n.d.                   | n.d.  | n.d.                    | n.d.  | 6      | d2    | 0.144906921 | 0.05  | 0.007663396      | 113.163315  | 0.552948 |
| 20  | M-20   | [La3L4(H2O)6]-Cl                              | MOF     | [210]    | n.d.                   | n.d.  | n.d.                    | n.d.  | 19     | d1    | 0.273519548 | 0.25  | 0.008693749      | 543.598237  | 0.783822 |
| 21  | M-21   | [Mn(mpto)2.CH3CH2OH]2                         | MOF     | [24]     | 86.2                   | s1    | n.d.                    | n.d.  | n.d.   | n.d.  | 0.053901013 | 0.55  | 1.27E-06         | 10.78692331 | 0.140194 |
| 22  | M-22   | [Ni(dipn)]2[Ni(dipn)(H2O)][Fe(CN)6]2.2H2O     | MOF     | [67]     | n.d.                   | n.d.  | n.d.                    | n.d.  | n.d.   | n.d.  | 0.196247646 | 0.05  | 0.011755152      | 164.1711497 | 0.630437 |
| 23  | M-23   | [Ni(pca)(bdc)0.5(H2O)2]                       | MOF     | [59]     | n.d.                   | n.d.  | n.d.                    | n.d.  | n.d.   | n.d.  | 0.158619042 | 0.05  | 0.006548765      | 122.8788389 | 0.588285 |
| 24  | M-24   | [Ni8(L5)6]                                    | MOF     | [6]      | 2215                   | s1    | n.d.                    | n.d.  | n.d.   | n.d.  | 1.052699405 | 0.75  | 0.002279367      | 81.95477544 | 0.525993 |
| 25  | M-25   | [Ni8(L5-CF3)6]                                | MOF     | [6]      | 1985                   | s1    | n.d.                    | n.d.  | n.d.   | n.d.  | 0.857636874 | 0.85  | 0.000475773      | 58.79207534 | 0.455622 |
| 26  | M-26   | [Ni8(L5-CH3)6]                                | MOF     | [107]    | n.d.                   | n.d.  | n.d.                    | n.d.  | n.d.   | n.d.  | 0.63096808  | 0.65  | 4.28E-05         | 37.87200629 | 0.356707 |
| 27  | M-27   | [PbL2]*2DMF*6H2O                              | MOF     | [99]     | n.d.                   | n.d.  | n.d.                    | n.d.  | 13     | d3    | 0.215334642 | 0.85  | 0.00392194       | 100.0820709 | 0.560398 |
| 28  | M-28   | [PbL2]*DMF*2H2O                               | MOF     | [99]     | n.d.                   | n.d.  | n.d.                    | n.d.  | 13     | d3    | 0.048438421 | 0.05  | 0.010531939      | 37.55421838 | 0.325028 |
| 29  | M-29   | [Zn(NO2-BDC)(dmbpy).5](C2H6O)(H2O)            | MOF     | [48]     | 925                    | s1    | n.d.                    | n.d.  | 9      | d2    | 0.169732315 | 0.45  | 0.000103889      | 35.01476648 | 0.337526 |
| 30  | M-30   | [Zn2(ip)2(bpy)2]*DMF]n                        | MOF     | [88]     | 300                    | s1    | n.d.                    | n.d.  | 6      | d2    | 0.042328796 | 0.25  | 0.001621206      | 55.70652581 | 0.42598  |
| 31  | M-31   | [Zn3(TCPB)2*2H2O]*2H2O*4DMF                   | MOF     | [10]     | 573                    | s1    | n.d.                    | n.d.  | 4.3    | d2    | 0.104953428 | 0.15  | 0.000547097      | 135.5492877 | 0.612592 |

|    |      |                                             |     |       |      |      |       |      |       |      |             |      |             |             |          |
|----|------|---------------------------------------------|-----|-------|------|------|-------|------|-------|------|-------------|------|-------------|-------------|----------|
| 32 | M-32 | [Zn4O(mipcapz)3]n on [Zn4O(dmcapz)3]n       | MOF | [1]   | 640  | s1   | 0.279 | v1   | n.d.  | n.d. | 0.132550096 | 0.75 | 1.24E-06    | 15.17396785 | 0.186262 |
| 33 | M-33 | {(H2PIP)0.5[VO(CEP)]*H2O}                   | MOF | [57]  | n.d. | n.d. | n.d.  | n.d. | n.d.  | n.d. | 0.060483089 | 0.25 | 4.43E-05    | 103.6625882 | 0.567284 |
| 34 | M-34 | {[Cu(azpy)(glut)](H2O)2}                    | MOF | [51]  | 131  | s2   | n.d.  | n.d. | 7.8   | d3   | 0.165397762 | 0.25 | 0.000178399 | 134.3022291 | 0.62155  |
| 35 | M-35 | {[Cu2(4-pmpmd)2(CH3OH)4(opd)2]*2H2O}        | MOF | [53]  | n.d. | n.d. | n.d.  | n.d. | 6.48  | d3   | 0.224113296 | 0.35 | 6.57E-07    | 66.90129388 | 0.482612 |
| 36 | M-36 | {[Cu2(pzdc)2(bpy)]*4H2O}                    | MOF | [30]  | n.d. | n.d. | n.d.  | n.d. | 9     | d2   | 0.167213489 | 0.05 | 0.052007339 | 251.5986206 | 0.625414 |
| 37 | M-37 | {[Cu4(OH)2(tci)2-(bpy)2]-11H2O}             | MOF | [127] | n.d. | n.d. | n.d.  | n.d. | 12.54 | d1   | 0.080869713 | 0.15 | 0.001295986 | 91.75020143 | 0.536578 |
| 38 | M-38 | {[Dy(ox)(Bpybc)(H2O)]*OH*13H2O}n            | MOF | [103] | n.d. | n.d. | n.d.  | n.d. | 8.4   | d3   | 0.238927337 | 0.65 | 0.004719372 | 184.8290916 | 0.666508 |
| 39 | M-39 | {[Ni(bpe)2(N(CN)2)](N(CN)2)}n               | MOF | [87]  | n.d. | n.d. | n.d.  | n.d. | 6.78  | d3   | 0.077415888 | 0.05 | 0.003035346 | 74.25676527 | 0.489677 |
| 40 | M-40 | {[Zn-(C10H2O8)0.5(C10S2N2H8)]*5H2O}n        | MOF | [61]  | n.d. | n.d. | n.d.  | n.d. | 12.7  | d3   | 0.085750301 | 0.05 | 0.007078219 | 116.5875137 | 0.563153 |
| 41 | M-41 | {[Zn(oxo-pba)2(bpy)]4H2O}n                  | MOF | [117] | n.d. | n.d. | n.d.  | n.d. | 6.2   | d3   | 0.077068032 | 0.75 | 0.002379007 | 40.8470216  | 0.363401 |
| 42 | M-42 | {[Zn2(bpdc)2(azpy)]*2H2O*2DMF}n             | MOF | [62]  | 235  | s1   | n.d.  | n.d. | 8.2   | d3   | 0.080015806 | 0.65 | 0.001483579 | 42.58878309 | 0.374685 |
| 43 | M-43 | {[Zn2(bpdc)2(azpy)]*2H2O*2DMF}n Nanoscale   | MOF | [62]  | 385  | s1   | n.d.  | n.d. | n.d.  | n.d. | 0.096342137 | 0.05 | 0.004007365 | 81.39887313 | 0.507954 |
| 44 | M-44 | {[Zn3(bpdc)3(azpy)]*4H2O*2DEF}n             | MOF | [62]  | 200  | s1   | n.d.  | n.d. | 11.9  | d2   | 0.111684322 | 0.85 | 0.002539602 | 83.44261205 | 0.520716 |
| 45 | M-45 | {[Zn4O(bfpdc)3-(bpy)0.5(H2O)]*(3DMF)(H2O)}n | MOF | [60]  | 1450 | s1   | 0.59  | v1   | 10.76 | d3   | 0.407886883 | 0.85 | 8.50E-17    | 0.001206392 | 1.86E-05 |
| 46 | M-46 | {[ZnL(HCO2)(H2O)]*DMF}                      | MOF | [109] | n.d. | n.d. | n.d.  | n.d. | n.d.  | n.d. | 0.47014202  | 0.45 | 0.007288208 | 114.3613406 | 0.572207 |
| 47 | M-47 | 1 C76H116N14O4Zn3                           | MOF | [118] | n.d. | n.d. | n.d.  | n.d. | n.d.  | n.d. | 0.16868733  | 0.05 | 0.006906125 | 153.6930774 | 0.629675 |
| 48 | M-48 | 13R(Co)                                     | MOF | [234] | 293  | s1   | n.d.  | n.d. | 8     | d3   | 0.01558669  | 0.65 | 7.94E-05    | 8.424957964 | 0.113165 |
| 49 | M-49 | 1-LiCl                                      | MOF | [112] | n.d. | n.d. | n.d.  | n.d. | n.d.  | n.d. | 0.229565198 | 0.15 | 8.65E-05    | 369.9474249 | 0.789692 |
| 50 | M-50 | 23R(Co)                                     | MOF | [234] | 267  | s1   | n.d.  | n.d. | 8     | d3   | 0.052795943 | 0.85 | 1.30E-06    | 3.810883125 | 0.055128 |
| 51 | M-51 | 2D [Cu(bpy)2(OTf)2]n                        | MOF | [70]  | 740  | s1   | 0.295 | v1   | n.d.  | n.d. | 0.177633584 | 0.85 | 0.002066215 | 181.6967976 | 0.651021 |
| 52 | M-52 | 33R(Co)                                     | MOF | [234] | 241  | s1   | n.d.  | n.d. | 8     | d3   | 0.04107238  | 0.55 | 4.46E-05    | 17.08438872 | 0.203308 |
| 53 | M-53 | 3S(Co)                                      | MOF | [234] | 281  | s1   | n.d.  | n.d. | 8     | d3   | 0.027462335 | 0.65 | 2.74E-05    | 7.967755823 | 0.10796  |
| 54 | M-54 | 43R(Co)                                     | MOF | [234] | 203  | s1   | n.d.  | n.d. | 8     | d3   | 0.019245782 | 0.65 | 9.58E-05    | 11.16916114 | 0.144085 |
| 55 | M-55 | Al(OH)-(1,4-NDC)                            | MOF | [226] | 546  | s2   | 0.22  | v1   | 7.7   | d3   | 0.158218396 | 0.45 | 8.55E-06    | 19.26289588 | 0.223077 |
| 56 | M-56 | AlaZnBr                                     | MOF | [227] | n.d. | n.d. | n.d.  | n.d. | 12.5  | d3   | 0.066465981 | 0.75 | 0.000117443 | 31.22294345 | 0.313421 |
| 57 | M-57 | AlaZnCl                                     | MOF | [227] | n.d. | n.d. | n.d.  | n.d. | 12.5  | d3   | 0.159731829 | 0.15 | 0.000853233 | 162.1537853 | 0.650628 |
| 58 | M-58 | AlaZnOAc                                    | MOF | [214] | n.d. | n.d. | n.d.  | n.d. | n.d.  | n.d. | 0.280444314 | 0.85 | 0.00713702  | 72.88050576 | 0.481896 |
| 59 | M-59 | ALFFIVE-1-Ni                                | MOF | [177] | 258  | s1   | 0.1   | v1   | n.d.  | n.d. | 0.233663825 | 0.05 | 0.026746109 | 88.92110119 | 0.398061 |
| 60 | M-60 | Aluminum fumarate                           | MOF | [126] | 971  | s1   | 0.85  | v1   | n.d.  | n.d. | 0.440095924 | 0.15 | 0.011482308 | 844.6210082 | 0.789254 |
| 61 | M-61 | Basolite™ F300(Fe)                          | MOF | [187] | 1600 | s1   | n.d.  | n.d. | n.d.  | n.d. | 0.375684758 | 0.25 | 0.01095934  | 415.0791308 | 0.753676 |
| 62 | M-62 | BIT-66(V)                                   | MOF | [238] | 1417 | s1   | 0.87  | v1   | 25.8  | d2   | 0.704999042 | 0.65 | 0           | 0           | 0        |
| 63 | M-63 | BIT-72(Al)                                  | MOF | [164] | 1618 | s1   | 0.59  | v1   | 6.2   | d2   | 0.52676009  | 0.55 | 0.000185884 | 104.975028  | 0.58272  |
| 64 | M-64 | BIT-73(Al)                                  | MOF | [164] | 1511 | s1   | 0.56  | v1   | 6.6   | d2   | 0.467808602 | 0.55 | 2.17E-05    | 38.64130744 | 0.359655 |
| 65 | M-65 | BIT-74(Al)                                  | MOF | [164] | 1394 | s1   | 0.51  | v1   | 5.7   | d2   | 0.577498058 | 0.95 | 2.27E-05    | 46.18274622 | 0.381472 |
| 66 | M-66 | Blucher-101408                              | MOF | [107] | n.d. | n.d. | n.d.  | n.d. | n.d.  | n.d. | 0.741298882 | 0.75 | 1.51E-19    | 0.00126029  | 1.94E-05 |
| 67 | M-67 | Bu-FeCr                                     | MOF | [112] | n.d. | n.d. | n.d.  | n.d. | n.d.  | n.d. | 0.043051862 | 0.75 | 0.000991085 | 32.27076728 | 0.316541 |
| 68 | M-68 | BUT-155(Cu)                                 | MOF | [158] | 2070 | s1   | 0.82  | v1   | 16    | d3   | 0.429609977 | 0.25 | 0.015935927 | 660.4018117 | 0.790437 |
| 69 | M-69 | BUT-46A(Zr)                                 | MOF | [159] | 1550 | s1   | 0.69  | v1   | 16    | d2   | 0.503352285 | 0.45 | 0.004052011 | 93.5754297  | 0.542443 |
| 70 | M-70 | BUT-46B(Zr)                                 | MOF | [159] | 1403 | s1   | 0.65  | v1   | 16    | d2   | 0.484661122 | 0.55 | 0.001699436 | 71.17081725 | 0.490843 |
| 71 | M-71 | BUT-46F(Zr)                                 | MOF | [159] | 1563 | s1   | 0.71  | v1   | 16    | d2   | 0.574709137 | 0.45 | 4.46E-05    | 72.08761696 | 0.495827 |
| 72 | M-72 | BUT-46W(Zr)                                 | MOF | [159] | 1565 | s1   | 0.71  | v1   | 16    | d2   | 0.599537928 | 0.35 | 0.007436412 | 370.9997729 | 0.755631 |
| 73 | M-73 | C10H4O12Eu2                                 | MOF | [91]  | n.d. | n.d. | n.d.  | n.d. | 5     | d2   | 0.098132796 | 0.05 | 0.00844423  | 124.1585886 | 0.569333 |
| 74 | M-74 | C115.5H202N14O43Zn4                         | MOF | [92]  | n.d. | n.d. | n.d.  | n.d. | 13    | d3   | 0.088442571 | 0.15 | 0.001494187 | 83.90308156 | 0.51963  |

|     |       |                          |     |       |        |      |        |      |      |      |             |      |             |             |          |
|-----|-------|--------------------------|-----|-------|--------|------|--------|------|------|------|-------------|------|-------------|-------------|----------|
| 75  | M-75  | C11H15BrN2O4Zn           | MOF | [73]  | n.d.   | n.d. | n.d.   | n.d. | n.d. | n.d. | 0.061531331 | 0.05 | 0.004376032 | 57.2374011  | 0.423612 |
| 76  | M-76  | C11H15ClN2O4Zn           | MOF | [73]  | n.d.   | n.d. | n.d.   | n.d. | n.d. | n.d. | 0.133025064 | 0.45 | 0.001337287 | 64.58007002 | 0.465153 |
| 77  | M-77  | C12H17ClN2O3Cd           | MOF | [52]  | n.d.   | n.d. | n.d.   | n.d. | 9.8  | d3   | 0.419649263 | 0.85 | 1.84E-07    | 5.708314941 | 0.080407 |
| 78  | M-78  | C15H27N2O10Dy            | MOF | [54]  | n.d.   | n.d. | n.d.   | n.d. | 10.4 | d3   | 0.111030943 | 0.05 | 0.007780646 | 210.8278398 | 0.652504 |
| 79  | M-79  | C15H27N2O10Er            | MOF | [54]  | n.d.   | n.d. | n.d.   | n.d. | 10.4 | d3   | 0.149247219 | 0.15 | 0.003833682 | 199.3886719 | 0.639189 |
| 80  | M-80  | C15H27N2O10Ho            | MOF | [54]  | n.d.   | n.d. | n.d.   | n.d. | 10.4 | d3   | 0.1046435   | 0.05 | 0.006562572 | 197.7588699 | 0.639269 |
| 81  | M-81  | C15H27N2O10Tb            | MOF | [54]  | n.d.   | n.d. | n.d.   | n.d. | 10.4 | d3   | 0.104723288 | 0.05 | 0.015105402 | 203.4483648 | 0.631472 |
| 82  | M-82  | C15H27N2O10Tm            | MOF | [54]  | n.d.   | n.d. | n.d.   | n.d. | 10.4 | d3   | 0.116477282 | 0.15 | 0.004104866 | 171.6248229 | 0.640156 |
| 83  | M-83  | C18H21Br2N4O9Cd2         | MOF | [52]  | n.d.   | n.d. | n.d.   | n.d. | 12   | d3   | 0.033449637 | 0.05 | 0.001602757 | 32.8162842  | 0.316744 |
| 84  | M-84  | C24H40N2O16Cl2Cd3        | MOF | [38]  | n.d.   | n.d. | 0.07   | v1   | 8.4  | d3   | 0.087344716 | 0.05 | 0.0096956   | 122.9032834 | 0.565323 |
| 85  | M-85  | C26H24Br2Cu2N8O3         | MOF | [102] | n.d.   | n.d. | n.d.   | n.d. | n.d. | n.d. | 0.075072844 | 0.05 | 0.015360811 | 77.72244428 | 0.442243 |
| 86  | M-86  | C28H24CoN10              | MOF | [94]  | 137    | s1   | n.d.   | n.d. | 6    | d2   | 0.076316731 | 0.85 | 0.002686532 | 50.31384925 | 0.407484 |
| 87  | M-87  | C32H24Cu3N6O12           | MOF | [13]  | 445    | s1   | n.d.   | n.d. | 9.8  | d3   | 0.180298956 | 0.15 | 0.011385625 | 302.4159028 | 0.696246 |
| 88  | M-88  | C32H46N4O8Zn             | MOF | [101] | n.d.   | n.d. | n.d.   | n.d. | 7.21 | d2   | 0.006018712 | 0.65 | 0.000134851 | 4.409979568 | 0.062953 |
| 89  | M-89  | C4H8HoKO12 Dehydrated    | MOF | [55]  | 69.1   | s2   | 0.1042 | v1   | 3.6  | d3   | 0.187247233 | 0.05 | 0.078178121 | 280.0398751 | 0.623073 |
| 90  | M-90  | C55H52Fe4N20O18          | MOF | [33]  | n.d.   | n.d. | n.d.   | n.d. | n.d. | n.d. | 0.101850663 | 0.05 | 0.038169416 | 154.8574297 | 0.588597 |
| 91  | M-91  | C62H44N2O8Zn2            | MOF | [58]  | 960    | s1   | 0.43   | v1   | 10.5 | d2   | 0.279552409 | 0.95 | 0.000227962 | 70.21550206 | 0.478647 |
| 92  | M-92  | C62H50Cd3K2N2O26         | MOF | [106] | 8.27   | s1   | n.d.   | n.d. | 12.7 | d2   | 0.145102154 | 0.05 | 0.004364069 | 161.8883029 | 0.635714 |
| 93  | M-93  | C9H11ClN2O4Cd            | MOF | [52]  | n.d.   | n.d. | n.d.   | n.d. | n.d. | n.d. | 0.094968809 | 0.05 | 0.00428737  | 187.9388568 | 0.641538 |
| 94  | M-94  | CALF-25                  | MOF | [74]  | 385    | s1   | n.d.   | n.d. | 4.6  | d2   | 0.072361431 | 0.75 | 0.001088709 | 39.07052038 | 0.357576 |
| 95  | M-95  | CAU-1(AI)-(OH)2          | MOF | [205] | n.d.   | n.d. | 0.5    | v1   | n.d. | n.d. | 0.310128925 | 0.35 | 0.008928379 | 190.1852621 | 0.656108 |
| 96  | M-96  | CAU-1(AI)-NH2            | MOF | [189] | 1530   | s1   | 0.64   | v1   | n.d. | n.d. | 0.376915556 | 0.45 | 0.001787251 | 28.61109453 | 0.288509 |
| 97  | M-97  | CAU-1(AI)-NHCH3          | MOF | [189] | 1340   | s1   | 0.53   | v1   | n.d. | n.d. | 0.511944778 | 0.35 | 0.002603728 | 150.9910586 | 0.637406 |
| 98  | M-98  | CAU-1(AI)-NHCOCH3        | MOF | [189] | 680    | s1   | 0.3    | v1   | n.d. | n.d. | 0.242910944 | 0.35 | 0.009655912 | 254.7433161 | 0.697165 |
| 99  | M-99  | CAU-10-CH3               | MOF | [112] | n.d.   | n.d. | n.d.   | n.d. | n.d. | n.d. | 0.180798213 | 0.45 | 0.00362674  | 51.16807952 | 0.410392 |
| 100 | M-100 | CAU-10-H                 | MOF | [112] | 600    | s1   | 0.26   | v1   | 7    | d2   | 0.379872893 | 0.15 | 0.001643033 | 721.4898298 | 0.674541 |
| 101 | M-101 | CAU-10-NH2               | MOF | [112] | n.d.   | n.d. | n.d.   | n.d. | n.d. | n.d. | 0.226554684 | 0.05 | 0.017249242 | 355.0448259 | 0.701687 |
| 102 | M-102 | CAU-10-NO2               | MOF | [112] | 440    | s1   | 0.18   | v1   | n.d. | n.d. | 0.174018131 | 0.35 | 1.08E-05    | 109.4997264 | 0.580612 |
| 103 | M-103 | CAU-10-OCH3              | MOF | [112] | n.d.   | n.d. | n.d.   | n.d. | n.d. | n.d. | 0.08764921  | 0.25 | 0.000678289 | 187.4066947 | 0.672536 |
| 104 | M-104 | CAU-10-OH                | MOF | [112] | n.d.   | n.d. | n.d.   | n.d. | n.d. | n.d. | 0.295797726 | 0.15 | 0.006996717 | 553.0821416 | 0.771535 |
| 105 | M-105 | CAU-10-pydc              | MOF | [2]   | 926    | s1   | 0.43   | v1   | n.d. | n.d. | 0.389492976 | 0.05 | 0.028410281 | 741.5351953 | 0.750945 |
| 106 | M-106 | CAU-13                   | MOF | [63]  | 380    | s1   | 0.15   | v1   | n.d. | n.d. | 0.137490639 | 0.25 | 0.001513944 | 243.239401  | 0.707645 |
| 107 | M-107 | CAU-1-NH2                | MOF | [98]  | 1530   | s1   | 0.64   | v2   | n.d. | n.d. | 0.391083518 | 0.45 | 0.001922594 | 56.09412936 | 0.435188 |
| 108 | M-108 | CAU-1-NHCH3              | MOF | [98]  | 1340   | s1   | 0.53   | v1   | n.d. | n.d. | 0.698688689 | 0.35 | 0.005191766 | 84.00343164 | 0.508946 |
| 109 | M-109 | CAU-1-NHCOCH3            | MOF | [98]  | 680    | s1   | 0.3    | v2   | n.d. | n.d. | 0.251244285 | 0.25 | 0.00609345  | 250.1433779 | 0.693255 |
| 110 | M-110 | CAU-23                   | MOF | [131] | 1250   | s1   | n.d.   | n.d. | 7.6  | d1   | 0.407314336 | 0.25 | 0.000708567 | 696.2947146 | 0.81822  |
| 111 | M-111 | CAU-3(AI)                | MOF | [191] | 1550   | s1   | 0.64   | v1   | 27   | d3   | 0.493741224 | 0.65 | 0.001951062 | 100.1215015 | 0.567208 |
| 112 | M-112 | CAU-3(AI)-NH2            | MOF | [191] | 1250   | s1   | 0.53   | v1   | n.d. | n.d. | 0.521111149 | 0.65 | 0.003985377 | 198.7946441 | 0.688933 |
| 113 | M-113 | CAU-6(AI)                | MOF | [203] | 620    | s1   | 0.25   | v1   | 10   | d3   | 0.358975538 | 0.05 | 0.029889773 | 271.5210072 | 0.620676 |
| 114 | M-114 | CAU-8(AI)                | MOF | [205] | n.d.   | n.d. | 0.25   | v1   | n.d. | n.d. | 0.158483704 | 0.35 | 0.000224092 | 84.21774925 | 0.489641 |
| 115 | M-115 | Cd (II)-MOF [Cd(L)(DMF)] | MOF | [113] | 231.31 | s1   | n.d.   | n.d. | 6    | d2   | 0.141478998 | 0.05 | 0.016454304 | 167.1307411 | 0.609184 |
| 116 | M-116 | Cd(BTTB)                 | MOF | [212] | 415    | s1   | 0.19   | v1   | 5.41 | d1   | 0.242901624 | 0.55 | 0.009116248 | 166.5491619 | 0.638305 |
| 117 | M-117 | Cd2(sdb)2(pcih)2         | MOF | [172] | n.d.   | n.d. | 0.22   | v1   | 4.4  | d2   | 0.1789279   | 0.25 | 0.000656838 | 302.8577775 | 0.737085 |

|     |       |                                                      |     |       |      |      |       |      |      |      |             |      |             |             |          |
|-----|-------|------------------------------------------------------|-----|-------|------|------|-------|------|------|------|-------------|------|-------------|-------------|----------|
| 118 | M-118 | Cd3L2                                                | MOF | [220] | 417  | s1   | n.d.  | n.d. | 8    | d3   | 0.118513324 | 0.05 | 0.008351457 | 80.30956068 | 0.478567 |
| 119 | M-119 | CID-3                                                | MOF | [90]  | n.d. | n.d. | n.d.  | n.d. | 8.1  | d2   | 0.097374879 | 0.55 | 7.53E-07    | 7.520685862 | 0.10268  |
| 120 | M-120 | Co(BTTB)(AZPY)                                       | MOF | [212] | 805  | s1   | 0.39  | v1   | 4.94 | d1   | 0.207403947 | 0.55 | 0.00027953  | 31.96160392 | 0.318211 |
| 121 | M-121 | Co(BTTB)(BPY)                                        | MOF | [212] | 843  | s1   | 0.4   | v1   | 4.06 | d1   | 0.025354391 | 0.85 | 3.93E-05    | 6.135896265 | 0.085535 |
| 122 | M-122 | Co(BTTB)(DMBPY)                                      | MOF | [201] | 809  | s1   | 0.29  | v1   | 4.41 | d1   | 0.1969837   | 0.85 | 6.34E-05    | 17.26904522 | 0.206065 |
| 123 | M-123 | Co2Cl2(BTDD)                                         | MOF | [132] | 1912 | s1   | n.d.  | n.d. | 22   | d1   | 0.940151904 | 0.25 | 0.02067297  | 394.7013481 | 0.740726 |
| 124 | M-124 | Co2Cl2BBTA                                           | MOF | [195] | n.d. | n.d. | n.d.  | n.d. | 13   | d3   | 0.420166302 | 0.05 | 0.046623597 | 334.2649349 | 0.619611 |
| 125 | M-125 | Cobalt Triazolyl Phosphonate MOF                     | MOF | [116] | n.d. | n.d. | n.d.  | n.d. | 13   | d2   | 0.196582842 | 0.05 | 0.007390575 | 387.8221934 | 0.719557 |
| 126 | M-126 | Cobalt Triazolyl Phosphonate MOF (95%RH)             | MOF | [116] | n.d. | n.d. | n.d.  | n.d. | 13   | d2   | 0.245199239 | 0.05 | 0.005260183 | 346.3998946 | 0.692578 |
| 127 | M-127 | Cobalt Triazolyl Phosphonate MOF (Activated at 403K) | MOF | [116] | n.d. | n.d. | n.d.  | n.d. | 13   | d2   | 0.358866014 | 0.05 | 0.010019359 | 339.4228543 | 0.741293 |
| 128 | M-128 | Co-CUK-1                                             | MOF | [130] | 510  | s1   | 0.26  | v1   | 13.4 | d1   | 0.298331923 | 0.15 | 0.001781923 | 659.3493398 | 0.772757 |
| 129 | M-129 | Co-MOF-74(M)                                         | MOF | [27]  | 1314 | s1   | 0.51  | v1   | 12   | d2   | 0.766850514 | 0.05 | 0.123083147 | 719.3156332 | 0.678394 |
| 130 | M-130 | Co-MOF-74(S)                                         | MOF | [27]  | 1327 | s1   | 0.52  | v1   | 12   | d2   | 0.970422594 | 0.05 | 0.19466153  | 1044.147082 | 0.702799 |
| 131 | M-131 | CoNIm                                                | MOF | [228] | 1858 | s2   | n.d.  | n.d. | 22   | d3   | 0.135527089 | 0.55 | 0.001629634 | 62.47238286 | 0.461862 |
| 132 | M-132 | CPO-27-Ni                                            | MOF | [100] | n.d. | n.d. | n.d.  | n.d. | 11   | d2   | 0.527958385 | 0.05 | 0.057233196 | 369.9022978 | 0.596592 |
| 133 | M-133 | Cr3(BTC)2                                            | MOF | [163] | 1330 | s1   | n.d.  | n.d. | n.d. | n.d. | 0.432000606 | 0.15 | 0.02221205  | 781.2631847 | 0.781152 |
| 134 | M-134 | Cr-MIL(101)                                          | MOF | [112] | 3124 | s1   | 1.58  | v1   | 34   | d2   | 1.339038707 | 0.45 | 0.000621212 | 342.5308983 | 0.760114 |
| 135 | M-135 | Cr-MIL-101-NO2                                       | MOF | [112] | 2146 | s1   | 1.19  | v1   | 34   | d2   | 0.753398389 | 0.45 | 0.006618339 | 142.7775207 | 0.62335  |
| 136 | M-136 | Cr-soc-MOF-1                                         | MOF | [173] | 4549 | s1   | 2.1   | v1   | 17   | d3   | 1.929962287 | 0.65 | -6.08E-18   | 7.88143E-06 | 1.08E-07 |
| 137 | M-137 | Cu(mtpm)Cl2                                          | MOF | [235] | n.d. | n.d. | n.d.  | n.d. | 8    | d3   | 0.027910947 | 0.05 | 0.002139203 | 24.77237221 | 0.256409 |
| 138 | M-138 | Cu2(dmcapz)2                                         | MOF | [219] | 539  | s1   | 0.227 | v1   | 9.7  | d3   | 0.221848832 | 0.35 | 0.002795129 | 35.67145895 | 0.325593 |
| 139 | M-139 | Cu2(pzdc)2bpe                                        | MOF | [30]  | n.d. | n.d. | n.d.  | n.d. | n.d. | n.d. | 0.210505749 | 0.05 | 0.021809068 | 357.8961819 | 0.687506 |
| 140 | M-140 | Cu2Cl2BBTA                                           | MOF | [195] | n.d. | n.d. | n.d.  | n.d. | 13   | d3   | 0.341944558 | 0.05 | 0.078677512 | 304.5282629 | 0.62508  |
| 141 | M-141 | Cu6(Trz)10(H2O)4[H2SiW12O40]·8H2O                    | MOF | [124] | n.d. | n.d. | n.d.  | n.d. | 5.65 | d1   | 0.092744533 | 0.85 | 0.000657997 | 84.48507112 | 0.52653  |
| 142 | M-142 | CuBTC                                                | MOF | [11]  | 1507 | s1   | n.d.  | n.d. | n.d. | n.d. | 0.525287501 | 0.05 | 0.026023397 | 586.7583512 | 0.741763 |
| 143 | M-143 | CuEBTC                                               | MOF | [192] | 1434 | s1   | 0.65  | v1   | 9    | d3   | 0.188646382 | 0.05 | 0.020566787 | 263.4772354 | 0.67541  |
| 144 | M-144 | CuMBTC                                               | MOF | [192] | 1471 | s1   | 0.79  | v1   | 9    | d3   | 0.189056047 | 0.45 | 0.013618273 | 186.2139304 | 0.637249 |
| 145 | M-145 | Cu-MOF                                               | MOF | [85]  | n.d. | n.d. | n.d.  | n.d. | n.d. | n.d. | 0.069570294 | 0.05 | 0.00449114  | 24.46800139 | 0.214536 |
| 146 | M-146 | Cu-Tria                                              | MOF | [243] | 188  | s1   | n.d.  | n.d. | n.d. | n.d. | 0.189956067 | 0.05 | 0.018556048 | 134.4517953 | 0.507672 |
| 147 | M-147 | DETA-MIL-101                                         | MOF | [97]  | 1560 | s1   | 1.1   | v1   | n.d. | n.d. | 0.105642838 | 0.05 | 0.00648769  | 52.24933351 | 0.395748 |
| 148 | M-148 | DMOF                                                 | MOF | [64]  | 1960 | s1   | 0.58  | v1   | 7.5  | d3   | 0.094164738 | 0.25 | 2.42E-06    | 123.3603331 | 0.602449 |
| 149 | M-149 | DMOF(Zn)-A                                           | MOF | [83]  | 760  | s1   | 0.33  | v1   | 4.8  | d1   | 0.292402997 | 0.25 | 8.97E-05    | 248.3684541 | 0.719762 |
| 150 | M-150 | DMOF(Zn)-Br                                          | MOF | [83]  | 1315 | s1   | 0.53  | v1   | 5    | d1   | 0.056451417 | 0.05 | 0.002547972 | 64.70821965 | 0.460136 |
| 151 | M-151 | DMOF(Zn)-N                                           | MOF | [83]  | 1420 | s1   | 0.57  | v1   | 5.7  | d1   | 0.021773607 | 0.05 | 0.000480639 | 26.28742886 | 0.267752 |
| 152 | M-152 | DMOF(Zn)-NH3                                         | MOF | [64]  | 2010 | s1   | 0.58  | v1   | 7.5  | d3   | 0.112754557 | 0.05 | 0.004454562 | 112.9839806 | 0.571517 |
| 153 | M-153 | DMOF-Cl2                                             | MOF | [83]  | 1175 | s1   | 0.45  | v1   | 3.8  | d2   | 0.073706417 | 0.35 | 0.000198323 | 25.46447003 | 0.271684 |
| 154 | M-154 | DMOF-NO2                                             | MOF | [83]  | 1310 | s1   | 0.53  | v1   | 6.2  | d2   | 0.129395754 | 0.45 | 0.006055571 | 61.02883856 | 0.434332 |
| 155 | M-155 | DMOF-OH                                              | MOF | [83]  | 1130 | s1   | 0.54  | v1   | 7.5  | d2   | 0.057281764 | 0.15 | 0.001124812 | 74.03798631 | 0.492034 |
| 156 | M-156 | DMOF-TM(Co)                                          | MOF | [201] | 1052 | s1   | 0.49  | v1   | 3.5  | d1   | 0.369453451 | 0.35 | 0.001491607 | 83.61835257 | 0.521703 |
| 157 | M-157 | DMOF-TM(Cu)                                          | MOF | [201] | 1041 | s1   | 0.46  | v1   | 3.5  | d1   | 0.383206667 | 0.55 | 0.000291137 | 57.36511394 | 0.445332 |
| 158 | M-158 | DMOF-TM(Ni)                                          | MOF | [201] | 1095 | s1   | 0.48  | v1   | 3.5  | d1   | 0.362781316 | 0.45 | 0.000438275 | 73.3302995  | 0.497794 |
| 159 | M-159 | DMOF-TM1(Zn)                                         | MOF | [196] | 1210 | s1   | 0.53  | v1   | 7.5  | d3   | 0.272351339 | 0.45 | 1.74E-05    | 94.83029402 | 0.554382 |
| 160 | M-160 | DMOF-TM2(Zn)                                         | MOF | [196] | 1050 | s1   | 0.51  | v1   | 3.5  | d3   | 0.414926163 | 0.25 | 8.83E-09    | 697.6739125 | 0.828863 |

|     |       |                                         |     |       |      |      |       |      |       |      |             |      |             |             |          |
|-----|-------|-----------------------------------------|-----|-------|------|------|-------|------|-------|------|-------------|------|-------------|-------------|----------|
| 161 | M-161 | DUT-10(Zn)                              | MOF | [18]  | 423  | s1   | n.d.  | n.d. | n.d.  | n.d. | 0.446058142 | 0.95 | 9.72E-07    | 22.55451977 | 0.252539 |
| 162 | M-162 | DUT-4                                   | MOF | [41]  | 1360 | s1   | 0.79  | v1   | 8.5   | d3   | 0.672343272 | 0.95 | 0.000823923 | 15.70506832 | 0.189898 |
| 163 | M-163 | DUT-51(Zr)                              | MOF | [190] | 2106 | s1   | 1.08  | v1   | 18.8  | d3   | 0.547636507 | 0.65 | 1.21E-05    | 43.06143018 | 0.384251 |
| 164 | M-164 | DUT-52(Zr)                              | MOF | [216] | 1399 | s1   | 0.54  | v1   | 8.59  | d3   | 0.28067997  | 0.35 | 0.001357    | 119.0378562 | 0.600199 |
| 165 | M-165 | DUT-53(Hf)                              | MOF | [216] | 1097 | s1   | 0.31  | v1   | 11.23 | d3   | 0.199288625 | 0.35 | 0.000163768 | 57.93356849 | 0.44657  |
| 166 | M-166 | DUT-67                                  | MOF | [75]  | 1560 | s1   | 0.6   | v1   | 16.6  | d2   | 0.505598453 | 0.25 | 0.018507217 | 672.0653808 | 0.792777 |
| 167 | M-167 | DUT-67(Hf)                              | MOF | [162] | 810  | s1   | 0.33  | v1   | 14.2  | d3   | 0.280350685 | 0.35 | 0.003129004 | 221.4389629 | 0.692896 |
| 168 | M-168 | DUT-68(Hf)                              | MOF | [162] | 749  | s1   | 0.34  | v1   | 27.7  | d3   | 0.275935938 | 0.45 | 0.004302448 | 239.4854195 | 0.700934 |
| 169 | M-169 | DUT-68(Zr)                              | MOF | [162] | 891  | s1   | 0.41  | v1   | 27.7  | d3   | 0.342093711 | 0.45 | 0.005221806 | 289.0388968 | 0.726155 |
| 170 | M-170 | DUT-69(Hf)                              | MOF | [162] | 450  | s1   | 0.22  | v1   | 5     | d3   | 0.184688473 | 0.05 | 0.006924653 | 228.7773881 | 0.687758 |
| 171 | M-171 | DUT-69(Zr)                              | MOF | [162] | 560  | s1   | 0.31  | v1   | 5     | d3   | 0.221022976 | 0.15 | 0.004700978 | 259.8788597 | 0.716532 |
| 172 | M-172 | DUT-84(Zr)                              | MOF | [216] | 637  | s1   | 0.27  | v1   | 11.14 | d3   | 0.125666464 | 0.25 | 0.000950547 | 111.6348964 | 0.583    |
| 173 | M-173 | ED-ZIF-8                                | MOF | [3]   | 1428 | s1   | 0.75  | v1   | 45.3  | d2   | 0.00319995  | 0.45 | 3.79E-06    | 2.557843662 | 0.037669 |
| 174 | M-174 | Et-MnCr                                 | MOF | [112] | n.d. | n.d. | n.d.  | n.d. | n.d.  | n.d. | 0.101799909 | 0.25 | 0.000333063 | 117.4037656 | 0.594017 |
| 175 | M-175 | FeFFIVE-1-Ni                            | MOF | [177] | 324  | s1   | 0.13  | v1   | n.d.  | n.d. | 0.257916281 | 0.05 | 0.022228266 | 200.8358409 | 0.564867 |
| 176 | M-176 | HKUST-1-F                               | MOF | [11]  | 1404 | s1   | n.d.  | n.d. | n.d.  | n.d. | 1.001541909 | 0.95 | 0.038725709 | 441.1414588 | 0.755847 |
| 177 | M-177 | HV-MOF-1(Er)                            | MOF | [231] | 165  | s2   | n.d.  | n.d. | 24    | d3   | 0.097572329 | 0.15 | 0.002384043 | 95.28692971 | 0.544049 |
| 178 | M-178 | IPM-MOF-201(Ni)                         | MOF | [160] | n.d. | n.d. | n.d.  | n.d. | 12.78 | d3   | 0.201533186 | 0.05 | 0.009351735 | 181.436369  | 0.652963 |
| 179 | M-179 | ISE-1(Ni)                               | MOF | [211] | n.d. | n.d. | 0.51  | v1   | n.d.  | n.d. | 0.143610089 | 0.05 | 0.016553794 | 206.9903153 | 0.633611 |
| 180 | M-180 | JUC-110                                 | MOF | [96]  | n.d. | n.d. | n.d.  | n.d. | 4.5   | d3   | 0.098132796 | 0.05 | 0.00844423  | 124.1585886 | 0.569333 |
| 181 | M-181 | JUK-8(Zn)                               | MOF | [239] | n.d. | n.d. | 0.256 | v1   | n.d.  | n.d. | 0.242198111 | 0.55 | 0.006677376 | 75.12669829 | 0.46169  |
| 182 | M-182 | kag-MOF-1(Zn)                           | MOF | [170] | 210  | s1   | 0.12  | v1   | 4.6   | d2   | 0.119362769 | 0.05 | 0.017474965 | 219.7146197 | 0.640487 |
| 183 | M-183 | KMF-1(Al)                               | MOF | [240] | 1130 | s1   | 0.473 | v1   | 6     | d1   | 0.433044779 | 0.15 | 0.00776528  | 954.9207482 | 0.790149 |
| 184 | M-184 | La(pyzdc)L5                             | MOF | [236] | n.d. | n.d. | n.d.  | n.d. | n.d.  | n.d. | 0.018265018 | 0.15 | 0.000388575 | 19.58521693 | 0.223622 |
| 185 | M-185 | LA <sup>1</sup> -Zr6 <sup>8</sup> -shp  | MOF | [182] | 2486 | s1   | 0.94  | v1   | n.d.  | n.d. | 0.351302766 | 0.55 | 0.009852715 | 184.4959473 | 0.659784 |
| 186 | M-186 | LA <sup>1</sup> -Zr6 <sup>8</sup> -csq  | MOF | [182] | 3150 | s1   | 2.18  | v1   | 47    | d3   | 0.384279556 | 0.65 | 0.002897549 | 42.98577117 | 0.373423 |
| 187 | M-187 | LA <sup>1</sup> -Zr6 <sup>8</sup> -flu  | MOF | [182] | 2850 | s1   | 1.31  | v1   | 38.6  | d3   | 0.198209087 | 0.75 | 0.000996825 | 60.29242151 | 0.456328 |
| 188 | M-188 | LA <sup>2</sup> -Zr6 <sup>8</sup> -shp  | MOF | [182] | 2250 | s1   | 0.89  | v1   | n.d.  | n.d. | 1.005080877 | 0.65 | 0.018805314 | 403.9030564 | 0.759292 |
| 189 | M-189 | LA <sup>2</sup> -Zr6 <sup>8</sup> -csq  | MOF | [182] | n.d. | n.d. | 2     | v1   | 47    | d3   | 1.449597515 | 0.75 | 0.003704031 | 192.9619343 | 0.693791 |
| 190 | M-190 | LA <sup>3</sup> -Zr6 <sup>8</sup> -flu  | MOF | [182] | 2950 | s1   | 1.01  | v1   | n.d.  | n.d. | 0.745239108 | 0.75 | 0.001110195 | 183.036369  | 0.6854   |
| 191 | M-191 | Lanthanum Triazolyl Phosphonate MOF     | MOF | [116] | n.d. | n.d. | n.d.  | n.d. | 19    | d2   | 0.274052974 | 0.25 | 0.00782489  | 527.0717077 | 0.780758 |
| 192 | M-192 | LB <sup>1</sup> -Zr6 <sup>8</sup> -flu  | MOF | [182] | 2450 | s1   | 0.94  | v1   | n.d.  | n.d. | 0.199008226 | 0.55 | 0.002539228 | 13.46820074 | 0.162707 |
| 193 | M-193 | LB <sup>2</sup> -Zr6 <sup>8</sup> -csq  | MOF | [182] | n.d. | n.d. | 1.41  | v1   | n.d.  | n.d. | 1.298983642 | 0.65 | 0.004447036 | 204.5770852 | 0.695957 |
| 194 | M-194 | LB <sup>2</sup> -Zr6 <sup>8</sup> -scu  | MOF | [182] | n.d. | n.d. | 0.96  | v1   | n.d.  | n.d. | 0.751842036 | 0.65 | 0.021613987 | 294.9654987 | 0.715589 |
| 195 | M-195 | LB <sup>3</sup> -Zr6 <sup>8</sup> -flu  | MOF | [182] | 2542 | s1   | 0.9   | v1   | n.d.  | n.d. | 0.720352848 | 0.55 | 0.009459818 | 95.72159088 | 0.520056 |
| 196 | M-196 | LC <sup>1</sup> -Zr6 <sup>12</sup> -fcu | MOF | [182] | n.d. | n.d. | 0.92  | v1   | 34.5  | d3   | 0.323389425 | 0.45 | 0.002214991 | 55.08762301 | 0.430904 |
| 197 | M-197 | LC <sup>2</sup> -Zr6 <sup>12</sup> -fcu | MOF | [182] | 2105 | s1   | 0.61  | v1   | n.d.  | n.d. | 0.428422204 | 0.45 | 0.002186347 | 49.13060003 | 0.405293 |
| 198 | M-198 | LC <sup>3</sup> -Zr6 <sup>8</sup> -bcu  | MOF | [182] | n.d. | n.d. | 0.54  | v1   | n.d.  | n.d. | 0.278320185 | 0.55 | 0.000946916 | 104.0551203 | 0.572245 |
| 199 | M-199 | MAF-4.23-7.77                           | MOF | [197] | 1870 | s1   | 0.64  | v1   | 11    | d3   | 0.447340455 | 0.45 | 6.05E-09    | 14.15835417 | 0.175577 |
| 200 | M-200 | MAF-4.49-7.51                           | MOF | [197] | 1870 | s1   | 0.65  | v1   | 11    | d3   | 0.431208293 | 0.65 | 4.84E-11    | 1.635449317 | 0.02447  |
| 201 | M-201 | MAF-4.76-7.24                           | MOF | [197] | 1870 | s1   | 0.64  | v1   | 11    | d3   | 0.393276192 | 0.85 | 7.08E-19    | 0.000692219 | 1.06E-05 |
| 202 | M-202 | MAF-7(Zn)                               | MOF | [197] | 1874 | s1   | 0.67  | v1   | 11.2  | d3   | 0.434546172 | 0.35 | 0.000184945 | 120.4967732 | 0.598557 |
| 203 | M-203 | Me-FeCr                                 | MOF | [112] | n.d. | n.d. | n.d.  | n.d. | n.d.  | n.d. | 0.212827269 | 0.55 | 0.002907439 | 50.93160935 | 0.40949  |

|     |       |                                    |     |       |      |      |       |      |      |      |             |      |             |             |          |
|-----|-------|------------------------------------|-----|-------|------|------|-------|------|------|------|-------------|------|-------------|-------------|----------|
| 204 | M-204 | MFU-4                              | MOF | [89]  | 1611 | s2   | 0.42  | v2   | n.d. | n.d. | 0.431395604 | 0.15 | 0.002873624 | 727.587416  | 0.803644 |
| 205 | M-205 | Mg-CPO-27                          | MOF | [112] | 1400 | s1   | 0.65  | v1   | 11   | d2   | 0.637303559 | 0.05 | 0.040571103 | 385.2081257 | 0.543273 |
| 206 | M-206 | Mg-CUK-1                           | MOF | [130] | 580  | s1   | 0.28  | v1   | 13.4 | d1   | 0.363863092 | 0.25 | 2.82E-05    | 651.7679263 | 0.80893  |
| 207 | M-207 | Mg-MOF-74©                         | MOF | [95]  | 1525 | s1   | 0.62  | v1   | 11   | d2   | 0.662247648 | 0.05 | 0.106317381 | 468.0017962 | 0.621697 |
| 208 | M-208 | MIL-100                            | MOF | [37]  | 1600 | s1   | n.d.  | n.d. | n.d. | n.d. | 0.365317629 | 0.25 | 0.005779545 | 376.6774509 | 0.754769 |
| 209 | M-209 | MIL-100(Al)                        | MOF | [178] | 1786 | s1   | n.d.  | n.d. | n.d. | n.d. | 0.658446269 | 0.45 | 0.017986044 | 416.9656052 | 0.754424 |
| 210 | M-210 | MIL-100(Cr)                        | MOF | [50]  | 1871 | s1   | 1.02  | v1   | 29   | d2   | 0.708954908 | 0.65 | 0.013727033 | 261.9154981 | 0.715029 |
| 211 | M-211 | MIL-100(Cr)(X=Cl)                  | MOF | [179] | 1522 | s1   | 0.7   | v1   | n.d. | n.d. | 0.599268672 | 0.35 | 0.02222327  | 526.9740731 | 0.76766  |
| 212 | M-212 | MIL-100(Cr)(X=SO4)                 | MOF | [179] | 1452 | s1   | 0.7   | v1   | n.d. | n.d. | 0.607772954 | 0.25 | 0.020658407 | 627.0892687 | 0.776529 |
| 213 | M-213 | MIL-100(Cr)-DEG                    | MOF | [34]  | 580  | s1   | 0.5   | v1   | 12   | d2   | 0.560718126 | 0.95 | 0.003874057 | 258.989567  | 0.721359 |
| 214 | M-214 | MIL-100(Cr)-EG                     | MOF | [34]  | 710  | s1   | 0.47  | v1   | 12   | d2   | 0.429676274 | 0.35 | 0.007795488 | 247.5506616 | 0.704831 |
| 215 | M-215 | MIL-100(Cr)-EN                     | MOF | [34]  | 640  | s1   | 0.42  | v1   | 15   | d2   | 0.368280986 | 0.25 | 0.007610811 | 300.4707369 | 0.731105 |
| 216 | M-216 | MIL-100(Cr)-TEG                    | MOF | [34]  | 680  | s1   | 0.53  | v1   | 12   | d2   | 0.33067934  | 0.35 | 0.005527477 | 168.8632131 | 0.652871 |
| 217 | M-217 | MIL-100(Fe)                        | MOF | [41]  | 1549 | s1   | 0.82  | v2   | 29   | d2   | 0.824965936 | 0.35 | 0.050045808 | 495.1573266 | 0.774234 |
| 218 | M-218 | MIL-100V                           | MOF | [125] | 1203 | s1   | 0.74  | v1   | 11   | d1   | 0.151153239 | 0.05 | 0.011109941 | 146.2239133 | 0.600936 |
| 219 | M-219 | MIL-101(Al)-NH2                    | MOF | [199] | 3363 | s1   | 1.67  | v1   | 25   | d2   | 0.268537763 | 0.05 | 0.013253166 | 187.0994974 | 0.634269 |
| 220 | M-220 | MIL-101(Al)-URPh                   | MOF | [199] | 1555 | s1   | 0.83  | v1   | 18   | d2   | 0.325853744 | 0.05 | 0.014617907 | 259.2670519 | 0.696145 |
| 221 | M-221 | MIL-101(Cr)-pCOOH                  | MOF | [183] | 2380 | s1   | 1.26  | v1   | n.d. | n.d. | 1.031695125 | 0.35 | 0.009594675 | 178.161549  | 0.650415 |
| 222 | M-222 | MIL-101(Cr)-pMal                   | MOF | [183] | 1670 | s1   | 0.89  | v1   | n.d. | n.d. | 0.701876868 | 0.45 | 0.001526432 | 250.3061516 | 0.724302 |
| 223 | M-223 | MIL-101(Cr)-pUR2                   | MOF | [183] | 1330 | s1   | 0.64  | v1   | n.d. | n.d. | 0.684240433 | 0.45 | 0.002653547 | 168.3696437 | 0.66371  |
| 224 | M-224 | MIL-101-NH2                        | MOF | [42]  | 2509 | s1   | 1.27  | v1   | 34   | d2   | 1.052714347 | 0.35 | 0.000650685 | 156.1672883 | 0.652839 |
| 225 | M-225 | MIL-101-SO3H                       | MOF | [42]  | 1920 | s1   | 0.94  | v1   | 34   | d2   | 0.745162373 | 0.35 | 0.016504721 | 637.35741   | 0.78774  |
| 226 | M-226 | MIL-101V                           | MOF | [125] | 2705 | s1   | 1.4   | v1   | 21   | d1   | 0.25368951  | 0.05 | 0.015633053 | 216.7337424 | 0.655796 |
| 227 | M-227 | MIL-125                            | MOF | [28]  | 1510 | s1   | 0.68  | v1   | n.d. | n.d. | 0.288950349 | 0.35 | 0.00014124  | 33.70686477 | 0.330806 |
| 228 | M-228 | MIL-125(Ti)-NH3 <sup>+</sup> 3+Cl- | MOF | [181] | 1388 | s1   | 0.5   | v1   | n.d. | n.d. | 0.58048035  | 0.15 | 0.006177663 | 1163.163919 | 0.824205 |
| 229 | M-229 | MIL-125(Ti)-NHCyp                  | MOF | [169] | 510  | s1   | n.d.  | n.d. | n.d. | n.d. | 0.110675333 | 0.15 | 0.002965627 | 123.4084975 | 0.591184 |
| 230 | M-230 | MIL-125(Ti)-NHMe                   | MOF | [169] | 1047 | s1   | n.d.  | n.d. | n.d. | n.d. | 0.294219129 | 0.25 | 0.002839648 | 461.3758881 | 0.77633  |
| 231 | M-231 | MIL-125-NH2                        | MOF | [112] | 1220 | s1   | 0.55  | v1   | 12   | d2   | 0.368255172 | 0.15 | 0.005869273 | 765.9392798 | 0.794908 |
| 232 | M-232 | MIL-160                            | MOF | [2]   | 1070 | s1   | 0.398 | v1   | 5    | d3   | 0.497065962 | 0.05 | 0.022823571 | 785.5035913 | 0.75618  |
| 233 | M-233 | MIL-163                            | MOF | [8]   | 170  | s1   | n.d.  | n.d. | 12   | d3   | 0.583277316 | 0.55 | 0.008726954 | 220.1102004 | 0.69671  |
| 234 | M-234 | MIL-47(V)-F                        | MOF | [223] | 1078 | s1   | 0.36  | v1   | n.d. | n.d. | 0.179957959 | 0.55 | 0.00124439  | 37.15322309 | 0.346872 |
| 235 | M-235 | MIL-47(V)-F2                       | MOF | [218] | 987  | s2   | 0.34  | v1   | n.d. | n.d. | 0.175171482 | 0.55 | 2.98E-06    | 9.892535296 | 0.130471 |
| 236 | M-236 | MIL-53(Al)-(OH)0.34(NH2)0.66       | MOF | [208] | n.d. | n.d. | n.d.  | n.d. | n.d. | n.d. | 0.103620557 | 0.05 | 0.012190174 | 126.947947  | 0.553286 |
| 237 | M-237 | MIL-53(Al)-(OH)0.53(NH2)0.47       | MOF | [208] | n.d. | n.d. | n.d.  | n.d. | n.d. | n.d. | 0.209207472 | 0.95 | 0.011649567 | 127.1804523 | 0.577926 |
| 238 | M-238 | MIL-53(Al)-(OH)0.68(NH2)0.32       | MOF | [208] | n.d. | n.d. | n.d.  | n.d. | n.d. | n.d. | 0.441262358 | 0.85 | 0.0210926   | 174.8655031 | 0.616747 |
| 239 | M-239 | MIL-53(Al)-(OH)2                   | MOF | [202] | n.d. | n.d. | 0.07  | v1   | n.d. | n.d. | 0.401615004 | 0.05 | 0.016750369 | 135.9203296 | 0.576266 |
| 240 | M-240 | MIL-53(Al)-Br                      | MOF | [202] | n.d. | n.d. | 0.14  | v1   | n.d. | n.d. | 0.103450142 | 0.85 | 0.000691525 | 74.58038546 | 0.501163 |
| 241 | M-241 | MIL-53(Al)-CH3                     | MOF | [202] | n.d. | n.d. | 0.32  | v1   | n.d. | n.d. | 0.11305649  | 0.15 | 0.00195386  | 144.4666307 | 0.621864 |
| 242 | M-242 | MIL-53(Al)-Cl                      | MOF | [202] | n.d. | n.d. | 0.32  | v1   | n.d. | n.d. | 0.136663898 | 0.05 | 0.005048064 | 175.535755  | 0.645652 |
| 243 | M-243 | MIL-53(Al)-F                       | MOF | [223] | 1137 | s1   | 0.48  | v1   | n.d. | n.d. | 0.06432521  | 0.85 | 0.000476907 | 5.820082364 | 0.081204 |
| 244 | M-244 | MIL-53(Al)-F2                      | MOF | [218] | 467  | s2   | 0.16  | v1   | n.d. | n.d. | 0.234427734 | 0.55 | 5.99E-11    | 1.133443664 | 0.017103 |
| 245 | M-245 | MIL-53(Al)ht                       | MOF | [105] | 1489 | s1   | 0.56  | v1   | 8.5  | d2   | 0.082386233 | 0.15 | 0.000120408 | 180.7882354 | 0.64292  |
| 246 | M-246 | MIL-53(Al)it                       | MOF | [105] | 1031 | s1   | 0.72  | v1   | 34   | d2   | 0.169374264 | 0.65 | 0.000343061 | 61.12676919 | 0.459948 |



|     |       |                                                                                |     |       |        |      |      |      |      |      |             |      |             |             |          |
|-----|-------|--------------------------------------------------------------------------------|-----|-------|--------|------|------|------|------|------|-------------|------|-------------|-------------|----------|
| 247 | M-247 | MIL-53(Al)-NH <sub>2</sub>                                                     | MOF | [176] | 940    | s1   | 0.37 | v1   | 13   | d3   | 0.084718069 | 0.05 | 0.017301746 | 96.58332732 | 0.497821 |
| 248 | M-248 | MIL-53(Al)-NO <sub>2</sub>                                                     | MOF | [202] | n.d.   | n.d. | 0.34 | v1   | n.d. | n.d. | 0.122392945 | 0.05 | 0.016223691 | 155.2897837 | 0.602883 |
| 249 | M-249 | MIL-53(Al)-OH                                                                  | MOF | [175] | n.d.   | n.d. | n.d. | n.d. | n.d. | n.d. | 0.390637719 | 0.85 | 0.013033841 | 195.4223901 | 0.666354 |
| 250 | M-250 | MIL-53(Al)-TDC                                                                 | MOF | [194] | 1150   | s1   | 0.48 | v1   | 8.2  | d3   | 0.535170719 | 0.35 | 0.001052167 | 120.215751  | 0.600785 |
| 251 | M-251 | MIL-53(Cr)                                                                     | MOF | [68]  | n.d.   | n.d. | n.d. | n.d. | n.d. | n.d. | 0.326575715 | 0.95 | 0.000107455 | 208.1859909 | 0.724336 |
| 252 | M-252 | MIL-53(Fe)-(COOH) <sub>2</sub>                                                 | MOF | [175] | n.d.   | n.d. | n.d. | n.d. | n.d. | n.d. | 0.1479941   | 0.05 | 0.01606069  | 125.905817  | 0.551948 |
| 253 | M-253 | MIL-53(Ga)                                                                     | MOF | [176] | 1230   | s1   | 0.47 | v1   | 20   | d3   | 0.062017173 | 0.05 | 0.006416549 | 39.04264063 | 0.315881 |
| 254 | M-254 | MIL-53(Ga)-NH <sub>2</sub>                                                     | MOF | [176] | 210    | s1   | n.d. | n.d. | 20   | d3   | 0.171047963 | 0.05 | 0.008667994 | 91.26476175 | 0.515177 |
| 255 | M-255 | MIL-68(In)                                                                     | MOF | [176] | 1110   | s1   | 0.42 | v1   | 16   | d3   | 0.30008142  | 0.55 | 1.33E-09    | 0.358164907 | 0.005475 |
| 256 | M-256 | MIL-68(In)-NH <sub>2</sub>                                                     | MOF | [176] | 850    | s1   | 0.3  | v1   | 16   | d3   | 0.332353762 | 0.45 | 5.31E-05    | 43.5901619  | 0.384085 |
| 257 | M-257 | MIL-91(Ti)                                                                     | MOF | [217] | 403    | s1   | 0.16 | v1   | 4    | d3   | 0.209607405 | 0.05 | 0.013831509 | 138.459618  | 0.51613  |
| 258 | M-258 | MIP-200                                                                        | MOF | [129] | 1000   | s1   | 0.4  | v1   | 13   | d1   | 0.424401855 | 0.15 | 0.018988887 | 740.3292455 | 0.762049 |
| 259 | M-259 | Mn <sub>2</sub> (Gd-H-DOTA-4AmP)(H <sub>2</sub> O) <sub>7</sub>                | MOF | [204] | n.d.   | n.d. | n.d. | n.d. | n.d. | n.d. | 0.280110766 | 0.05 | 0.01528369  | 317.1163332 | 0.720073 |
| 260 | M-260 | Mn <sub>2</sub> Cl <sub>2</sub> (BTDD)                                         | MOF | [132] | n.d.   | n.d. | n.d. | n.d. | 22   | d1   | 0.360882982 | 0.05 | 0.01885729  | 381.7181369 | 0.740529 |
| 261 | M-261 | MOF-1(Ce,Eu)                                                                   | MOF | [233] | n.d.   | n.d. | n.d. | n.d. | n.d. | n.d. | 0.062526094 | 0.05 | 0.003599382 | 35.13815773 | 0.325561 |
| 262 | M-262 | MOF-303(Al)                                                                    | MOF | [157] | 1119   | s1   | 0.58 | v1   | n.d. | n.d. | 0.427711981 | 0.15 | 0.02196392  | 838.1722224 | 0.771215 |
| 263 | M-263 | MOF-74(Ni)-BPP                                                                 | MOF | [186] | n.d.   | n.d. | 0.88 | v1   | 17   | d2   | 0.733469402 | 0.25 | 0.033654197 | 1224.028801 | 0.813555 |
| 264 | M-264 | MOF-74(Ni)-TPP                                                                 | MOF | [186] | n.d.   | n.d. | 1.14 | v1   | 23   | d2   | 0.891860901 | 0.55 | 0.029286854 | 232.8770426 | 0.664676 |
| 265 | M-265 | MOS-1(Co)                                                                      | MOF | [171] | 1112   | s1   | n.d. | n.d. | 13.9 | d3   | 0.315436918 | 0.05 | 0.049592169 | 530.1423733 | 0.724976 |
| 266 | M-266 | MOS-2(Co)                                                                      | MOF | [171] | 76     | s1   | n.d. | n.d. | 7.6  | d3   | 0.144877543 | 0.05 | 0.017666396 | 196.1439553 | 0.633992 |
| 267 | M-267 | MOS-3(Co)                                                                      | MOF | [171] | 27     | s1   | n.d. | n.d. | 7.5  | d3   | 0.130331485 | 0.05 | 0.014951392 | 158.0908908 | 0.60755  |
| 268 | M-268 | MUF-77(Zn)-butyl                                                               | MOF | [215] | 3250   | s1   | 1.21 | v1   | 13.6 | d2   | 0.22697701  | 0.85 | 1.51E-70    | 9.96158E-22 | 1.53E-23 |
| 269 | M-269 | MUF-77(Zn)-decyl                                                               | MOF | [215] | 1170   | s1   | 0.48 | v1   | n.d. | n.d. | 0.140885942 | 0.95 | 2.16E-06    | 1.807600536 | 0.027001 |
| 270 | M-270 | MUF-77(Zn)-ethyl                                                               | MOF | [215] | 3600   | s1   | 1.55 | v1   | 18.5 | d2   | 0.253010792 | 0.85 | 9.54E-35    | 1.61E-09    | 2.48E-11 |
| 271 | M-271 | MUF-77(Zn)-hexyl                                                               | MOF | [215] | 2170   | s1   | 1    | v1   | 11.2 | d2   | 0.142063255 | 0.85 | 1.75E-09    | 0.363051074 | 0.005551 |
| 272 | M-272 | MUF-77(Zn)-methyl                                                              | MOF | [215] | 3600   | s1   | 1.85 | v1   | 21.1 | d2   | 0.199193613 | 0.75 | 9.17E-16    | 0.002158333 | 3.32E-05 |
| 273 | M-273 | MUF-77(Zn)-octyl                                                               | MOF | [215] | 1570   | s1   | 0.65 | v1   | n.d. | n.d. | 0.10796083  | 0.85 | 1.40E-07    | 2.20771866  | 0.032774 |
| 274 | M-274 | MUF-7a(Zn)                                                                     | MOF | [215] | 4450   | s1   | 2.16 | v1   | n.d. | n.d. | 0.160199745 | 0.45 | 1.06E-18    | 0.104754255 | 0.001609 |
| 275 | M-275 | NBu <sub>4</sub>                                                               | MOF | [112] | n.d.   | n.d. | n.d. | n.d. | n.d. | n.d. | 0.010976246 | 0.05 | 0.000341323 | 8.194537252 | 0.110064 |
| 276 | M-276 | NENU-11                                                                        | MOF | [69]  | 572    | s1   | 0.39 | v1   | n.d. | n.d. | 0.024384263 | 0.15 | 0.001349376 | 52.27691461 | 0.406816 |
| 277 | M-277 | Ni(BTTB)                                                                       | MOF | [212] | 391    | s1   | 0.2  | v1   | 4.3  | d1   | 0.011726874 | 0.05 | 0.000666446 | 14.42598124 | 0.175385 |
| 278 | M-278 | Ni(dpip) <sub>2</sub> .5DMF                                                    | MOF | [237] | 1441.6 | s2   | n.d. | n.d. | 10   | d2   | 0.197664336 | 0.25 | 0.002108145 | 218.11357   | 0.693512 |
| 279 | M-279 | Ni <sub>2</sub> SZn <sub>75</sub> -MOF-74                                      | MOF | [188] | 1160   | s1   | n.d. | n.d. | n.d. | n.d. | 0.515249846 | 0.15 | 0.029444318 | 1077.480297 | 0.782353 |
| 280 | M-280 | Ni <sub>2</sub> Cl <sub>2</sub> (BTDD)                                         | MOF | [132] | 1762   | s1   | n.d. | n.d. | 22   | d1   | 0.735604073 | 0.35 | 0.018294763 | 342.6475701 | 0.727413 |
| 281 | M-281 | Ni <sub>2</sub> Cl <sub>2</sub> BBTA                                           | MOF | [195] | n.d.   | n.d. | n.d. | n.d. | 13   | d3   | 0.403991923 | 0.05 | 0.037662587 | 348.3243835 | 0.639495 |
| 282 | M-282 | Ni <sub>3</sub> C <sub>8</sub> H <sub>11</sub> N <sub>18</sub> O <sub>29</sub> | MOF | [56]  | n.d.   | n.d. | 0.68 | v1   | 16   | d2   | 0.255224043 | 0.15 | 0.004646201 | 213.2775156 | 0.692518 |
| 283 | M-283 | Ni <sub>50</sub> Zn <sub>50</sub> -MOF-74                                      | MOF | [188] | 1190   | s1   | n.d. | n.d. | n.d. | n.d. | 0.534689238 | 0.05 | 0.033994188 | 1117.262464 | 0.77231  |
| 284 | M-284 | Ni <sub>75</sub> Zn <sub>25</sub> -MOF-74                                      | MOF | [188] | 1200   | s1   | n.d. | n.d. | n.d. | n.d. | 0.558835134 | 0.15 | 0.023377778 | 1161.846223 | 0.790105 |
| 285 | M-285 | Ni <sub>8</sub> (L1) <sub>6</sub>                                              | MOF | [6]   | 205    | s1   | 0.52 | v1   | n.d. | n.d. | 0.40056716  | 0.95 | 0.016535198 | 266.7627015 | 0.714806 |
| 286 | M-286 | Ni <sub>8</sub> (L2) <sub>6</sub>                                              | MOF | [6]   | 990    | s1   | 0.52 | v1   | n.d. | n.d. | 0.606961946 | 0.95 | 0.001137476 | 231.9240613 | 0.720997 |
| 287 | M-287 | Ni <sub>8</sub> (L3) <sub>6</sub>                                              | MOF | [6]   | 1770   | s1   | 1.21 | v1   | n.d. | n.d. | 0.927167251 | 0.45 | 0.004850478 | 58.01875029 | 0.43524  |
| 288 | M-288 | Ni <sub>8</sub> (L4) <sub>6</sub>                                              | MOF | [6]   | 1920   | s1   | 0.97 | v1   | n.d. | n.d. | 0.878911391 | 0.45 | 1.27E-05    | 50.74636807 | 0.420877 |
| 289 | M-289 | Ni <sub>8</sub> (L5-(CF <sub>3</sub> ) <sub>2</sub> ) <sub>6</sub>             | MOF | [6]   | 2195   | s1   | n.d. | n.d. | n.d. | n.d. | 0.851119016 | 0.85 | 0.000427627 | 52.32601802 | 0.429101 |

|     |       |                                |     |       |       |      |        |      |      |      |             |      |             |             |          |
|-----|-------|--------------------------------|-----|-------|-------|------|--------|------|------|------|-------------|------|-------------|-------------|----------|
| 290 | M-290 | NI8(L5-(CH3)2)6                | MOF | [6]   | 1985  | s1   | n.d.   | n.d. | n.d. | n.d. | 0.636497655 | 0.75 | 0.000417473 | 65.08192028 | 0.478136 |
| 291 | M-291 | Ni-CUK-1                       | MOF | [130] | 520   | s1   | 0.26   | v1   | 13.4 | d1   | 0.308395558 | 0.15 | 0.001274309 | 667.3326275 | 0.777564 |
| 292 | M-292 | Ni-DOBDC                       | MOF | [81]  | 639   | s1   | 0.362  | v1   | 11   | d2   | 0.699551835 | 0.05 | 0.064024574 | 308.2504254 | 0.581344 |
| 293 | M-293 | Ni-MOF                         | MOF | [198] | 1960  | s1   | 0.71   | v1   | n.d. | n.d. | 0.449166682 | 0.35 | 0.002833942 | 182.9383077 | 0.671073 |
| 294 | M-294 | NU-1000(Zr)                    | MOF | [185] | 2320  | s1   | 1.4    | v1   | 31   | d2   | 1.372340473 | 0.95 | 6.79E-08    | 11.9812527  | 0.148279 |
| 295 | M-295 | NU-1000(Zr)-SALI-1             | MOF | [185] | 1710  | s1   | 1      | v1   | 30   | d2   | 0.865541944 | 0.85 | 0.000432018 | 163.0544263 | 0.668355 |
| 296 | M-296 | NU-1000(Zr)-SALI-7             | MOF | [185] | 900   | s1   | 0.6    | v1   | 28   | d2   | 0.457813455 | 0.85 | 2.36E-05    | 87.35618259 | 0.542306 |
| 297 | M-297 | NU-1000(Zr)-SALI-9             | MOF | [185] | 870   | s1   | 0.6    | v1   | 28   | d2   | 0.360910484 | 0.85 | 0.000445225 | 65.39769937 | 0.478563 |
| 298 | M-298 | NU-1000(Zr)-TFA                | MOF | [241] | 1880  | s1   | n.d.   | n.d. | 31   | d3   | 1.276977692 | 0.65 | 0.004628426 | 169.0447211 | 0.665899 |
| 299 | M-299 | NU-901(Zr)-TFA                 | MOF | [241] | 1980  | s1   | n.d.   | n.d. | 11   | d3   | 0.563326647 | 0.55 | 0.003487522 | 116.5683284 | 0.592184 |
| 300 | M-300 | NU-905(Zr)-TFA                 | MOF | [241] | 2055  | s1   | n.d.   | n.d. | 20   | d3   | 0.727495102 | 0.45 | 3.04E-05    | 73.74400379 | 0.501098 |
| 301 | M-301 | PCP-1(La)                      | MOF | [165] | n.d.  | n.d. | 0.1218 | v1   | n.d. | n.d. | 0.098090909 | 0.65 | 0.001527379 | 63.8798226  | 0.463227 |
| 302 | M-302 | Pip-CPO-27-Ni                  | MOF | [100] | 46.7  | s1   | n.d.   | n.d. | n.d. | n.d. | 0.283069114 | 0.05 | 0.023520852 | 213.2309208 | 0.563202 |
| 303 | M-303 | PIZOF-2                        | MOF | [75]  | 2080  | s1   | 0.88   | v1   | 17.6 | d2   | 0.690592468 | 0.75 | 1.09E-55    | 3.66366E-15 | 5.64E-17 |
| 304 | M-304 | pretreated a-Al                | MOF | [114] | n.d.  | n.d. | n.d.   | n.d. | n.d. | n.d. | 0.007948468 | 0.15 | 0.000209154 | 15.28612377 | 0.184089 |
| 305 | M-305 | pretreated m-Al                | MOF | [114] | n.d.  | n.d. | n.d.   | n.d. | n.d. | n.d. | 0.007442734 | 0.15 | 0.000348414 | 12.80169428 | 0.159792 |
| 306 | M-306 | SALI-5(Zr)                     | MOF | [180] | 1270  | s1   | 0.85   | v1   | 29   | d2   | 0.707883074 | 0.85 | 0.000211074 | 105.07945   | 0.585803 |
| 307 | M-307 | SALI-9(Zr)                     | MOF | [180] | 900   | s1   | 0.63   | v1   | 27.5 | d2   | 0.409866405 | 0.85 | 3.14E-05    | 49.72577109 | 0.417965 |
| 308 | M-308 | SALI-9'(Zr)                    | MOF | [180] | 1190  | s1   | 0.87   | v1   | 29.6 | d2   | 0.758279452 | 0.85 | 9.09E-10    | 2.063701248 | 0.030625 |
| 309 | M-309 | SALI-BA(Zr)                    | MOF | [180] | 2005  | s1   | 1.21   | v1   | 27.8 | d2   | 0.984661111 | 0.85 | 2.05E-06    | 34.24522391 | 0.336257 |
| 310 | M-310 | SIFSIX-14-Cu-i                 | MOF | [213] | n.d.  | n.d. | n.d.   | n.d. | n.d. | n.d. | 0.15525335  | 0.05 | 0.015474454 | 213.4524517 | 0.640764 |
| 311 | M-311 | SIFSIX-1-Cu                    | MOF | [213] | n.d.  | n.d. | n.d.   | n.d. | n.d. | n.d. | 0.150845573 | 0.05 | 0.012161796 | 309.6073399 | 0.692807 |
| 312 | M-312 | SIFSIX-2-Cu-i                  | MOF | [213] | n.d.  | n.d. | n.d.   | n.d. | n.d. | n.d. | 0.248879786 | 0.75 | 0.007667268 | 221.4568828 | 0.689958 |
| 313 | M-313 | SIFSIX-3-Ni                    | MOF | [213] | n.d.  | n.d. | n.d.   | n.d. | n.d. | n.d. | 0.161107122 | 0.05 | 0.017303676 | 263.7653439 | 0.668803 |
| 314 | M-314 | SIM-1                          | MOF | [112] | 470   | s1   | 0.23   | v1   | 6    | d2   | 0.131592032 | 0.25 | 0.00086942  | 154.9884358 | 0.639486 |
| 315 | M-315 | S-MIL-53(Al)                   | MOF | [40]  | n.d.  | n.d. | n.d.   | n.d. | n.d. | n.d. | 1.058074498 | 0.85 | 9.14E-16    | 3.511118691 | 0.051031 |
| 316 | M-316 | SNU-80                         | MOF | [14]  | 456   | s1   | 0.18   | v1   | 7    | d3   | 0.009373608 | 0.05 | 0.000403634 | 9.868657881 | 0.128921 |
| 317 | M-317 | STAM-17(Cu)-Oet                | MOF | [224] | 58.42 | s1   | n.d.   | n.d. | n.d. | n.d. | 0.149279745 | 0.05 | 0.08360182  | 291.74787   | 0.664821 |
| 318 | M-318 | TAF-1a                         | MOF | [16]  | 268.5 | s1   | n.d.   | n.d. | 4.6  | d2   | 0.012010011 | 0.05 | 0.000711319 | 11.09546314 | 0.141545 |
| 319 | M-319 | ThrZnOAc                       | MOF | [214] | n.d.  | n.d. | n.d.   | n.d. | n.d. | n.d. | 0.150330381 | 0.25 | 0.000370772 | 296.944778  | 0.732054 |
| 320 | M-320 | Ti(pyridine-2-carboxylic acid) | MOF | [11]  | n.d.  | n.d. | n.d.   | n.d. | n.d. | n.d. | 0.180255949 | 0.15 | 0.001169572 | 162.7801125 | 0.648136 |
| 321 | M-321 | TUC-110(Cd)                    | MOF | [230] | n.d.  | n.d. | n.d.   | n.d. | n.d. | n.d. | 0.09807167  | 0.05 | 0.007944081 | 121.8747257 | 0.56592  |
| 322 | M-322 | UiO-66                         | MOF | [75]  | 1290  | s1   | 0.49   | v1   | 8.4  | d2   | 0.425506024 | 0.35 | 0.001898017 | 203.5160111 | 0.683939 |
| 323 | M-323 | UiO-66(Hf)-(OH)2               | MOF | [167] | 920   | s1   | 0.4    | v1   | 5.85 | d2   | 0.284201897 | 0.05 | 0.031992992 | 378.2207674 | 0.703265 |
| 324 | M-324 | UiO-66(Zr)-(C2H5)2             | MOF | [200] | 340   | s1   | 0.16   | v1   | n.d. | n.d. | 0.17513366  | 0.95 | 0.000869281 | 84.58484969 | 0.527454 |
| 325 | M-325 | UiO-66(Zr)-(CF3)2              | MOF | [200] | 630   | s1   | 0.3    | v1   | n.d. | n.d. | 0.182363484 | 0.35 | 0.0001871   | 84.15112733 | 0.526943 |
| 326 | M-326 | UiO-66(Zr)-(CH3)2              | MOF | [200] | 790   | s1   | 0.35   | v1   | n.d. | n.d. | 0.27517369  | 0.25 | 0.007535298 | 211.9908991 | 0.683437 |
| 327 | M-327 | UiO-66(Zr)-(COOH)2             | MOF | [5]   | 415   | s1   | 0.21   | v1   | n.d. | n.d. | 0.247479533 | 0.05 | 0.011545638 | 268.7785778 | 0.706726 |
| 328 | M-328 | UiO-66(Zr)-(OH)2               | MOF | [167] | 1230  | s1   | 0.56   | v1   | 5.85 | d2   | 0.308956621 | 0.05 | 0.038777015 | 464.3982396 | 0.73298  |
| 329 | M-329 | UiO-66(Zr)-1,4-Naphthyl        | MOF | [193] | 757   | s1   | 0.4    | v1   | n.d. | n.d. | 0.287955402 | 0.15 | 0.015378566 | 361.650391  | 0.748549 |
| 330 | M-330 | UiO-66(Zr)-2,5-(oMe)2          | MOF | [193] | 868   | s1   | 0.38   | v1   | n.d. | n.d. | 0.466773732 | 0.15 | 0.022078061 | 708.4522855 | 0.780965 |
| 331 | M-331 | UiO-66(Zr)-C2F5                | MOF | [200] | 570   | s1   | 0.26   | v1   | n.d. | n.d. | 0.24060938  | 0.85 | 0.002878941 | 57.73430123 | 0.442156 |
| 332 | M-332 | UiO-66(Zr)-CF3                 | MOF | [200] | 815   | s1   | 0.36   | v1   | n.d. | n.d. | 0.267912625 | 0.35 | 0.001239155 | 231.372879  | 0.706516 |

|     |       |                                                                |     |       |       |      |       |      |       |      |             |      |             |             |          |
|-----|-------|----------------------------------------------------------------|-----|-------|-------|------|-------|------|-------|------|-------------|------|-------------|-------------|----------|
| 333 | M-333 | UiO-66(Zr)-CH3                                                 | MOF | [207] | 1065  | s1   | 0.51  | v1   | n.d.  | n.d. | 0.309088479 | 0.25 | 0.003275969 | 307.6785912 | 0.735035 |
| 334 | M-334 | UiO-66(Zr)-NH3 <sup>+</sup> 3+Cl-                              | MOF | [181] | 1007  | s1   | 0.35  | v1   | n.d.  | n.d. | 0.604925638 | 0.05 | 0.035006001 | 912.2861638 | 0.778297 |
| 335 | M-335 | UiO-66(Zr)-NO2                                                 | MOF | [193] | 792   | s1   | 0.42  | v1   | n.d.  | n.d. | 0.391303918 | 0.15 | 0.013732541 | 749.25377   | 0.783768 |
| 336 | M-336 | UiO-66(Zr <sup>4+</sup> ) with high concentration stearic acid | MOF | [47]  | n.d.  | n.d. | 0.574 | v1   | 6.5   | d2   | 0.522819782 | 0.35 | 0.0191929   | 604.9641854 | 0.778948 |
| 337 | M-337 | UiO-66(Zr <sup>4+</sup> ) with metal/ligand ratio 6:3          | MOF | [47]  | n.d.  | n.d. | 0.45  | v1   | 6     | d2   | 0.420137117 | 0.35 | 0.016744609 | 407.4134749 | 0.745029 |
| 338 | M-338 | UiO-66D(Zr)                                                    | MOF | [200] | n.d.  | n.d. | n.d.  | n.d. | n.d.  | n.d. | 0.333159849 | 0.65 | 0.000930261 | 26.20326487 | 0.278065 |
| 339 | M-339 | UiO-66D(Zr)-(CF3)2                                             | MOF | [200] | 2180  | s1   | 0.88  | v1   | n.d.  | n.d. | 0.280177712 | 0.85 | -1.52E-18   | 6.22653E-15 | 9.43E-17 |
| 340 | M-340 | UiO-66-NH2                                                     | MOF | [64]  | 1040  | s1   | 0.57  | v1   | 6     | d2   | 0.384387735 | 0.15 | 0.020005424 | 753.2742416 | 0.774049 |
| 341 | M-341 | UiO-67(Zr)                                                     | MOF | [166] | 2145  | s1   | n.d.  | n.d. | n.d.  | n.d. | 0.284821904 | 0.45 | 0.004334139 | 71.81078578 | 0.485387 |
| 342 | M-342 | UiO-67(Zr)-BIPY                                                | MOF | [166] | 2385  | s1   | n.d.  | n.d. | n.d.  | n.d. | 0.21045566  | 0.25 | 0.007074058 | 291.4848083 | 0.701282 |
| 343 | M-343 | UiO-67(Zr)-BN                                                  | MOF | [168] | 1416  | s1   | 0.548 | v1   | n.d.  | n.d. | 0.493011054 | 0.55 | 3.71E-07    | 38.3419324  | 0.359435 |
| 344 | M-344 | UMCM-1                                                         | MOF | [64]  | 6010  | s1   | 2.41  | v1   | 32    | d2   | 0.26239535  | 0.75 | 0.003248938 | 125.8332028 | 0.606103 |
| 345 | M-345 | untreated a-Al                                                 | MOF | [114] | n.d.  | n.d. | n.d.  | n.d. | n.d.  | n.d. | 0.003825435 | 0.05 | 0.000330135 | 4.861868435 | 0.068396 |
| 346 | M-346 | untreated m-Al                                                 | MOF | [114] | n.d.  | n.d. | n.d.  | n.d. | n.d.  | n.d. | 0.009671484 | 0.15 | 0.000100468 | 18.37818195 | 0.212825 |
| 347 | M-347 | ValZnCl                                                        | MOF | [227] | n.d.  | n.d. | n.d.  | n.d. | 12.2  | d3   | 0.124495805 | 0.85 | 0.000274072 | 46.99103631 | 0.402669 |
| 348 | M-348 | ValZnOAc                                                       | MOF | [214] | n.d.  | n.d. | n.d.  | n.d. | n.d.  | n.d. | 0.284637869 | 0.75 | 0.003615879 | 82.8577724  | 0.522207 |
| 349 | M-349 | Y-fum-fcu-MOF                                                  | MOF | [7]   | 691   | s1   | 0.28  | v1   | 8     | d2   | 0.372250645 | 0.05 | 0.006403716 | 741.8168169 | 0.772592 |
| 350 | M-350 | Y-shp-MOF-5                                                    | MOF | [174] | 1550  | s1   | 0.63  | v1   | n.d.  | n.d. | 0.502225621 | 0.65 | 0.01050338  | 138.6355934 | 0.615912 |
| 351 | M-351 | ZIF-412(Zn)                                                    | MOF | [161] | 1520  | s1   | n.d.  | n.d. | 38.1  | d2   | 0.071961578 | 0.75 | 0.00011276  | 13.06847681 | 0.164724 |
| 352 | M-352 | ZIF-71(Zn)                                                     | MOF | [209] | 1183  | s1   | 0.39  | v1   | n.d.  | n.d. | 0.007619033 | 0.05 | 0.000653415 | 5.608540073 | 0.077815 |
| 353 | M-353 | ZIF-8                                                          | MOF | [58]  | n.d.  | n.d. | n.d.  | n.d. | n.d.  | n.d. | 0.140004414 | 0.95 | 2.55E-07    | 1.078235066 | 0.016251 |
| 354 | M-354 | ZIF-8_50-90_50                                                 | MOF | [155] | 1350  | s1   | 0.61  | v1   | n.d.  | n.d. | 0.373884826 | 0.75 | 0           | 3.58025E-13 | 5.42E-15 |
| 355 | M-355 | ZIF-8_55-71_45                                                 | MOF | [155] | 630   | s1   | 0.29  | v1   | n.d.  | n.d. | 0.014188257 | 0.15 | 0.000148019 | 10.74388039 | 0.139182 |
| 356 | M-356 | ZIF-8_70-90_30                                                 | MOF | [155] | 1310  | s1   | 0.61  | v1   | n.d.  | n.d. | 0.07443547  | 0.85 | 0           | 0           | 0        |
| 357 | M-357 | ZIF-90(Zn)                                                     | MOF | [209] | 1280  | s1   | 0.49  | v1   | n.d.  | n.d. | 0.332062752 | 0.35 | 2.85E-10    | 44.52722532 | 0.381984 |
| 358 | M-358 | Zn(BTTB)                                                       | MOF | [212] | 447   | s1   | 0.25  | v1   | 4.47  | d1   | 0.209056821 | 0.75 | 0.000301107 | 82.63420981 | 0.528013 |
| 359 | M-359 | Zn(BTTB)(AZPY)                                                 | MOF | [212] | 647   | s1   | 0.36  | v1   | 4.94  | d1   | 0.19048136  | 0.55 | 1.39E-07    | 12.78831989 | 0.16194  |
| 360 | M-360 | Zn(BTTB)(BDC)                                                  | MOF | [212] | 441   | s1   | 0.21  | v1   | 4.24  | d1   | 0.08957362  | 0.15 | 0.000750907 | 69.94579776 | 0.478739 |
| 361 | M-361 | Zn(BTTB)(BPY)                                                  | MOF | [212] | 841   | s1   | 0.38  | v1   | 4.06  | d1   | 0.252616617 | 0.75 | 2.03E-38    | 1.22855E-10 | 1.89E-12 |
| 362 | M-362 | Zn(BTTB)(DMBPY)                                                | MOF | [201] | 749   | s1   | 0.27  | v1   | 4.41  | d1   | 0.210438246 | 0.85 | 9.17E-06    | 9.72448197  | 0.128815 |
| 363 | M-363 | Zn(DM)0.5(AT)                                                  | MOF | [232] | n.d.  | n.d. | n.d.  | n.d. | n.d.  | n.d. | 0.085283941 | 0.05 | 0.018943593 | 112.7324539 | 0.550825 |
| 364 | M-364 | Zn(II)-MOF [Zn(HPyImDC)(DMA)]n                                 | MOF | #N/A  | 185.6 | s1   | n.d.  | n.d. | 4.425 | d1   | 0.064361385 | 0.05 | 0.004616737 | 52.5483783  | 0.398597 |
| 365 | M-365 | Zn(L)(tdca)*1.5DMF                                             | MOF | [119] | n.d.  | n.d. | n.d.  | n.d. | 6.6   | d3   | 0.068252503 | 0.05 | 0.00365508  | 91.75801363 | 0.516871 |
| 366 | M-366 | Zn(NDI-H)                                                      | MOF | [110] | 1460  | s1   | n.d.  | n.d. | 16    | d3   | 0.427152275 | 0.45 | 2.61E-05    | 36.91795936 | 0.348209 |
| 367 | M-367 | Zn(NDI-NHEt)                                                   | MOF | [110] | 1236  | s1   | n.d.  | n.d. | n.d.  | n.d. | 0.29071397  | 0.45 | 2.65E-05    | 51.38917832 | 0.420916 |
| 368 | M-368 | Zn(NDI-SEt)                                                    | MOF | [112] | 888   | s1   | n.d.  | n.d. | 16    | d2   | 0.283435813 | 0.25 | 0.010958513 | 333.5540272 | 0.737165 |
| 369 | M-369 | Zn(NDI-SO2Et)                                                  | MOF | [112] | 764   | s1   | n.d.  | n.d. | 16    | d2   | 0.214493776 | 0.35 | 0.000972599 | 141.4450738 | 0.626629 |
| 370 | M-370 | Zn(NDI-SOEt)                                                   | MOF | [112] | 927   | s1   | n.d.  | n.d. | 16    | d2   | 0.283435813 | 0.25 | 0.010958513 | 333.5540272 | 0.737165 |
| 371 | M-371 | Zn(NO3)2*6H2O                                                  | MOF | [12]  | n.d.  | n.d. | 0.17  | v1   | 17.3  | d3   | 0.165407999 | 0.05 | 0.024637759 | 316.8461966 | 0.681538 |
| 372 | M-372 | Zn2(bptc)                                                      | MOF | [225] | 313   | s1   | 0.15  | v1   | n.d.  | n.d. | 0.151899763 | 0.15 | 0.000414928 | 248.2029807 | 0.69968  |
| 373 | M-373 | Zn2C14N2O8H4                                                   | MOF | [66]  | 312.7 | s1   | 0.146 | v1   | 5.2   | d2   | 0.178903355 | 0.15 | 0.000171657 | 269.9743786 | 0.711337 |
| 374 | M-374 | Zn2Co3(MFU-4l)                                                 | MOF | [184] | 3544  | s1   | n.d.  | n.d. | 16.2  | d2   | 1.078922814 | 0.45 | 6.59E-05    | 47.89550743 | 0.404057 |
| 375 | M-375 | Zn3(TCPB)2(H2O)2                                               | MOF | [108] | 284   | s1   | n.d.  | n.d. | 4.3   | d2   | 0.080967226 | 0.85 | 0.00161864  | 66.16957195 | 0.472633 |

|     |       |                    |     |       |      |      |       |      |      |      |             |      |             |             |          |
|-----|-------|--------------------|-----|-------|------|------|-------|------|------|------|-------------|------|-------------|-------------|----------|
| 376 | M-376 | Zn3Co2(MFU-4l)     | MOF | [184] | 3037 | s1   | n.d.  | n.d. | 16.1 | d2   | 0.933303071 | 0.45 | 0.000282771 | 52.24349474 | 0.423973 |
| 377 | M-377 | Zn3L2              | MOF | [220] | 535  | s1   | n.d.  | n.d. | 4.5  | d3   | 0.197481147 | 0.45 | 0.004433582 | 64.81524624 | 0.454888 |
| 378 | M-378 | Zn4O(dmcapz)3      | MOF | [72]  | 840  | s1   | 0.45  | v2   | 6    | d2   | 0.386252684 | 0.85 | 3.28E-12    | 0.080497121 | 0.001237 |
| 379 | M-379 | Zn5(MFU-4l)        | MOF | [184] | 3525 | s1   | n.d.  | n.d. | 16.5 | d2   | 1.039999981 | 0.65 | 3.01E-53    | 1.31827E-12 | 2.03E-14 |
| 380 | M-380 | Zn-BTTB-DMBPY      | MOF | [84]  | 749  | s1   | 0.269 | v1   | 4.41 | d2   | 0.212145729 | 0.85 | 4.92E-05    | 11.8378722  | 0.152073 |
| 381 | M-381 | ZnCo4(MFU-4l)      | MOF | [184] | 3091 | s1   | n.d.  | n.d. | n.d. | n.d. | 0.73366512  | 0.35 | 0.000656516 | 20.80644276 | 0.202642 |
| 382 | M-382 | Zn-MOF-74(cycle 1) | MOF | [49]  | n.d. | n.d. | n.d.  | n.d. | n.d. | n.d. | 0.30473112  | 0.05 | 0.031166149 | 230.8498698 | 0.590683 |
| 383 | M-383 | Zn-Trimesate       | MOF | [221] | n.d. | n.d. | n.d.  | n.d. | 5    | d1   | 0.191240619 | 0.05 | 0.018725034 | 194.4920496 | 0.603192 |
| 384 | M-384 | Zr-Fum HT          | MOF | [242] | 1020 | s1   | 0.553 | v1   | 7.5  | d2   | 0.421503274 | 0.05 | 0.015726677 | 845.2241909 | 0.769347 |
| 385 | M-385 | Zr-MOF-801-P       | MOF | [75]  | 990  | s1   | 0.45  | v1   | 7.4  | d2   | 0.353337839 | 0.05 | 0.00936137  | 721.2660121 | 0.763867 |
| 386 | M-386 | Zr-MOF-801-SC      | MOF | [75]  | 690  | s1   | 0.27  | v1   | 7.4  | d2   | 0.277295605 | 0.05 | 0.000755354 | 514.6543682 | 0.757147 |
| 387 | M-387 | Zr-MOF-802         | MOF | [75]  | 20   | s1   | 0.01  | v1   | 5.6  | d2   | 0.085072421 | 0.05 | 0.007261338 | 102.6440109 | 0.541456 |
| 388 | M-388 | Zr-MOF-804         | MOF | [75]  | 1145 | s1   | 0.46  | v1   | 7.2  | d2   | 0.339163933 | 0.45 | 0.001944916 | 79.70880276 | 0.498225 |
| 389 | M-389 | Zr-MOF-805         | MOF | [75]  | 1230 | s1   | 0.48  | v1   | 9.5  | d2   | 0.332925229 | 0.35 | 0.002111432 | 226.7492798 | 0.701004 |
| 390 | M-390 | Zr-MOF-806         | MOF | [75]  | 2220 | s1   | 0.85  | v1   | 12.6 | d2   | 0.266152366 | 0.05 | 0.034186061 | 385.5856762 | 0.707297 |
| 391 | M-391 | Zr-MOF-808         | MOF | [75]  | 2060 | s1   | 0.84  | v1   | 18.4 | d2   | 0.572069429 | 0.35 | 0.00789984  | 180.9596289 | 0.651969 |
| 392 | M-392 | Zr-MOF-841         | MOF | [75]  | 1390 | s1   | 0.53  | v1   | 9.2  | d2   | 0.482990008 | 0.25 | 5.80E-05    | 945.0075276 | 0.829717 |
| 393 | C-1   | 2,5-DhaTab         | COF | [135] | n.d. | n.d. | n.d.  | n.d. | n.d. | n.d. | 0.567901494 | 0.85 | 7.83E-06    | 14.61304946 | 0.180901 |
| 394 | C-2   | 2,3-DhaTph         | COF | [135] | 659  | s1   | n.d.  | n.d. | 20   | d1   | 0.144551587 | 0.65 | 0.00041687  | 103.0331066 | 0.570247 |
| 395 | C-3   | 2,5-DhaTph         | COF | [135] | 1112 | s1   | n.d.  | n.d. | 20   | d1   | 0.169390323 | 0.65 | 0.000540108 | 16.48609631 | 0.197687 |
| 396 | C-4   | AB-COF             | COF | [133] | 1125 | s1   | 0.47  | v1   | 13   | d1   | 0.347584161 | 0.25 | 8.42E-06    | 671.1610043 | 0.812696 |
| 397 | C-5   | Ad2L1              | COF | [140] | 918  | s1   | 0.86  | v1   | n.d. | n.d. | 0.279405316 | 0.85 | 5.81E-11    | 0.465652999 | 0.007105 |
| 398 | C-6   | Ad2L2              | COF | [140] | 1316 | s1   | 2.2   | v1   | n.d. | n.d. | 0.14942995  | 0.85 | 4.17E-07    | 6.729213013 | 0.093111 |
| 399 | C-7   | Ad2L3              | COF | [140] | 747  | s1   | 0.45  | v1   | n.d. | n.d. | 0.22910699  | 0.75 | 0.000237689 | 47.13325851 | 0.403283 |
| 400 | C-8   | Ad3L1              | COF | [140] | 1199 | s1   | 0.8   | v1   | n.d. | n.d. | 0.415801945 | 0.75 | 2.43E-05    | 37.40452045 | 0.353965 |
| 401 | C-9   | Ad3L2              | COF | [140] | 1093 | s1   | 0.96  | v1   | n.d. | n.d. | 0.374513785 | 0.85 | 1.61E-10    | 0.899916072 | 0.013629 |
| 402 | C-10  | Ad3L3              | COF | [140] | 1328 | s1   | 0.93  | v1   | n.d. | n.d. | 0.545551611 | 0.75 | 2.48E-12    | 0.355808179 | 0.005442 |
| 403 | C-11  | Ad4L1              | COF | [140] | 1617 | s1   | 0.9   | v1   | n.d. | n.d. | 0.447003907 | 0.55 | 0.00020576  | 78.67474522 | 0.51755  |
| 404 | C-12  | Ad4L2              | COF | [140] | 1885 | s1   | 1.52  | v1   | n.d. | n.d. | 0.686162376 | 0.85 | 7.84E-14    | 0.101408424 | 0.001558 |
| 405 | C-13  | Ad4L3              | COF | [140] | 1341 | s1   | 0.74  | v1   | n.d. | n.d. | 0.522857307 | 0.55 | 0.001471305 | 119.0154178 | 0.601344 |
| 406 | C-14  | ATFG-COF           | COF | [133] | 520  | s1   | 0.5   | v1   | 13   | d1   | 0.290484138 | 0.15 | 0.004381974 | 304.3131807 | 0.737196 |
| 407 | C-15  | bipy -CTF500       | COF | [138] | 1548 | s1   | 0.71  | v1   | 8    | d1   | 0.422223944 | 0.35 | 0.005425682 | 380.6369248 | 0.760904 |
| 408 | C-16  | bpim -CTF -300     | COF | [142] | 2.4  | s1   | n.d.  | n.d. | n.d. | n.d. | 0.153404013 | 0.95 | 0.003928976 | 97.45636464 | 0.553248 |
| 409 | C-17  | bpim -CTF -400     | COF | [142] | 786  | s1   | 0.34  | v1   | n.d. | n.d. | 0.300465211 | 0.05 | 0.013141475 | 345.9798338 | 0.732702 |
| 410 | C-18  | bpim -CTF -500     | COF | [142] | 1556 | s1   | 0.75  | v1   | n.d. | n.d. | 0.486059199 | 0.45 | 0.006409464 | 232.2339939 | 0.704478 |
| 411 | C-19  | CE-1               | COF | [137] | 960  | s1   | 0.97  | v1   | 8.2  | d1   | 0.267784288 | 0.75 | 0.00021895  | 93.92493256 | 0.557279 |
| 412 | C-20  | CE-2               | COF | [137] | 588  | s1   | 0.47  | v1   | 7.8  | d1   | 0.066125386 | 0.65 | 0.000991074 | 46.19345187 | 0.393252 |
| 413 | C-21  | CE-3               | COF | [137] | 540  | s1   | 0.43  | v1   | 8.6  | d1   | 0.069852695 | 0.65 | 0.000484562 | 39.56496389 | 0.361041 |
| 414 | C-22  | COF-432            | COF | [244] | 895  | s1   | 0.43  | v1   | 8    | d1   | 0.289395193 | 0.35 | 8.19E-06    | 19.67652681 | 0.226311 |
| 415 | C-23  | CTF-a              | COF | [139] | 2439 | s1   | 1.96  | v1   | n.d. | n.d. | 1.313891234 | 0.65 | 2.62E-07    | 24.20830575 | 0.248805 |
| 416 | C-24  | CTF-b              | COF | [139] | 1179 | s1   | 0.64  | v1   | n.d. | n.d. | 0.54157319  | 0.35 | 0.009833301 | 439.895921  | 0.771788 |
| 417 | C-25  | CTF-c              | COF | [139] | 2071 | s1   | 1.36  | v1   | n.d. | n.d. | 0.869318557 | 0.55 | 0.000127126 | 191.7524444 | 0.693208 |
| 418 | C-26  | CTF-d              | COF | [140] | 1683 | s1   | 2.63  | v1   | n.d. | n.d. | 0.726657285 | 0.85 | 1.12E-06    | 42.50852025 | 0.38347  |

|     |      |                           |         |       |       |      |      |      |      |      |             |      |             |             |          |
|-----|------|---------------------------|---------|-------|-------|------|------|------|------|------|-------------|------|-------------|-------------|----------|
| 419 | C-27 | DCBP -CTF - 1             | COF     | [143] | 2437  | s1   | 1.48 | v1   | n.d. | n.d. | 0.498429618 | 0.85 | 1.45E-05    | 38.3829128  | 0.359984 |
| 420 | C-28 | F -DCBP -CTF - 1          | COF     | [143] | 1574  | s1   | 1.5  | v1   | n.d. | n.d. | 0.192555556 | 0.85 | 0.000101702 | 31.988639   | 0.319657 |
| 421 | C-29 | MM1                       | COF     | [141] | 1800  | s1   | 1.11 | v1   | n.d. | n.d. | 0.493740584 | 0.75 | 4.35E-06    | 43.17636987 | 0.384947 |
| 422 | C-30 | MM2                       | COF     | [141] | 1360  | s1   | 0.67 | v1   | n.d. | n.d. | 0.419973752 | 0.35 | 0.005136968 | 239.9667126 | 0.709356 |
| 423 | C-31 | MM3                       | COF     | [141] | 1884  | s1   | 1.52 | v1   | n.d. | n.d. | 0.753041074 | 0.85 | 7.01E-08    | 11.43494435 | 0.145711 |
| 424 | C-32 | MM4                       | COF     | [141] | 1407  | s1   | 0.78 | v1   | n.d. | n.d. | 0.371207711 | 0.55 | 0.001455256 | 82.68271154 | 0.52433  |
| 425 | C-33 | pym -CTF500               | COF     | [138] | 208   | s1   | n.d. | n.d. | 8    | d1   | 0.210234255 | 0.05 | 0.016987929 | 165.2863258 | 0.596458 |
| 426 | C-34 | TpAnq                     | COF     | [136] | 1027  | s1   | n.d. | n.d. | 16.3 | d1   | 0.356499502 | 0.35 | 0.000253824 | 152.7583722 | 0.649648 |
| 427 | C-35 | Tp-Azo                    | COF     | [135] | 942   | s1   | n.d. | n.d. | 27   | d1   | 0.394341285 | 0.55 | 0.000154082 | 60.33304239 | 0.458657 |
| 428 | C-36 | Tp-Azo                    | COF     | [136] | 3038  | s1   | n.d. | n.d. | 25.8 | d1   | 0.475918112 | 0.55 | 1.31E-08    | 6.760601533 | 0.093413 |
| 429 | C-37 | TpBD                      | COF     | [135] | 341   | s1   | n.d. | n.d. | 24   | d1   | 0.133562917 | 0.45 | 0.00030153  | 47.00917362 | 0.399847 |
| 430 | C-38 | TpBD                      | COF     | [136] | 1400  | s1   | n.d. | n.d. | 21.8 | d1   | 0.562804979 | 0.45 | 1.05E-05    | 39.90507756 | 0.366507 |
| 431 | C-39 | TpBD-(NO2)2               | COF     | [135] | 90    | s1   | n.d. | n.d. | 22   | d1   | 0.078553477 | 0.55 | 0.000373503 | 33.5644726  | 0.327626 |
| 432 | C-40 | TpBD-(NO2)2               | COF     | [136] | 769   | s1   | n.d. | n.d. | 16.3 | d1   | 0.365770733 | 0.35 | 0.000129639 | 86.24556679 | 0.536998 |
| 433 | C-41 | TpBD-(OMe)2               | COF     | [135] | 365   | s1   | n.d. | n.d. | 23   | d1   | 0.130259926 | 0.55 | 0.000880845 | 36.2138149  | 0.341846 |
| 434 | C-42 | TpBD-(OMe)2               | COF     | [136] | 1343  | s1   | n.d. | n.d. | 16.3 | d1   | 0.353788093 | 0.55 | 0.000329729 | 34.06640836 | 0.330667 |
| 435 | C-43 | TpBD-Me2                  | COF     | [135] | n.d.  | n.d. | n.d. | n.d. | n.d. | n.d. | 0.130259926 | 0.55 | 0.000880845 | 36.2138149  | 0.341846 |
| 436 | C-44 | TpBD-Me2                  | COF     | [136] | 3109  | s1   | n.d. | n.d. | 16.3 | d1   | 0.356562456 | 0.55 | 4.92E-07    | 19.13486487 | 0.222694 |
| 437 | C-45 | TpBpy                     | COF     | [136] | 2336  | s1   | n.d. | n.d. | 24.2 | d1   | 0.76505039  | 0.45 | 4.63E-06    | 47.23832005 | 0.402801 |
| 438 | C-46 | TpHZ                      | COF     | [245] | 422   | s1   | 0.56 | v1   | 7    | d2   | 0.391853224 | 0.25 | 0.004351858 | 574.9706571 | 0.795138 |
| 439 | C-47 | TpPa-1                    | COF     | [135] | 984   | s1   | n.d. | n.d. | 18   | d1   | 0.412319505 | 0.15 | 0.002494176 | 662.2930877 | 0.805649 |
| 440 | C-48 | TpPa-1*                   | COF     | [136] | 1432  | s1   | n.d. | n.d. | 14.8 | d1   | 0.508653291 | 0.25 | 4.30E-05    | 501.106808  | 0.80199  |
| 441 | C-49 | TpPa-2                    | COF     | [135] | 460   | s1   | n.d. | n.d. | 15   | d1   | 0.202156405 | 0.35 | 0.000519744 | 133.82654   | 0.622558 |
| 442 | C-50 | TpPa-2*                   | COF     | [136] | 538   | s1   | n.d. | n.d. | 10.6 | d1   | 0.305756585 | 0.25 | 0.000182719 | 270.8286477 | 0.733202 |
| 443 | C-51 | TpPa-F4                   | COF     | [135] | 529   | s1   | n.d. | n.d. | 17   | d1   | 0.17902296  | 0.65 | 2.63E-05    | 17.10378571 | 0.204206 |
| 444 | C-52 | TpPa-NO2                  | COF     | [135] | 457   | s1   | n.d. | n.d. | 16   | d1   | 0.17902296  | 0.65 | 2.63E-05    | 17.10378571 | 0.204206 |
| 445 | C-53 | TpPa-NO2                  | COF     | [136] | 850   | s1   | n.d. | n.d. | 13.2 | d1   | 0.47810461  | 0.15 | 0.000487634 | 476.9598602 | 0.790072 |
| 446 | C-54 | TpTph                     | COF     | [136] | 1020  | s1   | n.d. | n.d. | 25.8 | d1   | 0.327807584 | 0.65 | 0.000417368 | 34.6091601  | 0.335351 |
| 447 | C-55 | TpTta                     | COF     | [136] | 825   | s1   | n.d. | n.d. | 8.6  | d1   | 0.33450653  | 0.75 | 0.000229351 | 197.5226404 | 0.695374 |
| 448 | C-56 | trzn-COF                  | COF     | [134] | 408.5 | s1   | 0.21 | v1   | 23   | d1   | 0.068891992 | 0.65 | 0.001436592 | 53.77525984 | 0.425676 |
| 449 | Z-1  | CBV-901                   | Zeolite | [77]  | n.d.  | n.d. | 0.31 | v1   | 7.4  | d2   | 1.21E-05    | 0.05 | 1.40E-06    | 0.019953808 | 0.000307 |
| 450 | Z-2  | H0.34Na0.06Al0.4Si47.6O96 | Zeolite | [21]  | 340   | s1   | 0.24 | v1   | 4    | d2   | 0.153272444 | 0.15 | 0.002359705 | 162.2739977 | 0.641957 |
| 451 | Z-3  | HiSiv 3000 Zeolite        | Zeolite | [76]  | 282   | s1   | 0.1  | v2   | 15.2 | d1   | 0.030592954 | 0.05 | 0.001984272 | 35.4244324  | 0.324841 |
| 452 | Z-4  | K6Na6Al12O48              | Zeolite | [21]  | 756   | s1   | 0.57 | v1   | 4    | d2   | 0.259864592 | 0.05 | 0.011373219 | 81.7462776  | 0.352926 |
| 453 | Z-5  | MCM-41                    | Zeolite | [50]  | 882   | s1   | 0.63 | v1   | 34   | d2   | 0.560661512 | 0.75 | 0.001047751 | 114.0616838 | 0.598007 |
| 454 | Z-6  | NaX                       | Zeolite | [128] | 1010  | s1   | 0.31 | v1   | 10.5 | d1   | 0.33148317  | 0.05 | 0.012784433 | 143.0370418 | 0.446221 |
| 455 | Z-7  | Na-ZSM-5                  | Zeolite | [50]  | 366   | s1   | 0.18 | v1   | 6    | d2   | 0.30473112  | 0.05 | 0.031166149 | 230.8498698 | 0.590683 |
| 456 | Z-8  | Zeolite 13X               | Zeolite | [43]  | n.d.  | n.d. | n.d. | n.d. | n.d. | n.d. | 0.32066269  | 0.05 | 0.007294272 | 692.446057  | 0.761198 |
| 457 | Z-9  | Zeolite 4A                | Zeolite | [79]  | n.d.  | n.d. | n.d. | n.d. | 11.4 | d2   | 0.286451781 | 0.05 | 0.025731054 | 214.9120287 | 0.548309 |
| 458 | Z-10 | Zeolite Na-A              | Zeolite | [121] | n.d.  | n.d. | n.d. | n.d. | n.d. | n.d. | 0.253694094 | 0.05 | 0.072963424 | 298.2305533 | 0.638711 |
| 459 | Z-11 | Zn2(pbc)2*Hdma*H3O*2H2O   | Zeolite | [9]   | 213   | s2   | n.d. | n.d. | n.d. | n.d. | 0.14754382  | 0.05 | 0.015317173 | 155.6442235 | 0.608756 |
| 460 | Z-12 | ZSM-5                     | Zeolite | [65]  | n.d.  | n.d. | n.d. | n.d. | n.d. | n.d. | 0.010949513 | 0.35 | 0.000386052 | 10.49976448 | 0.13574  |

n.d. represents "no data" .

For Sa notes: s1 represents BET surface area; s2 represents Langmuir surface area.

For Va notes: v1 represents pore volume based on N2 adsorption, v2 represents pore volume measured basing on H2O adsorption.

For Dp notes: d1 represents average pore diameter, d2 represents dominant pore size obtained according to pore size distribution, d3 represents largest cavity diameter.

**Table S4.** Predicted indexes of 148 adsorbents by machine learning model (RF)

| No. | ID No. | Adsorbent                                                                                          | Species | Ref. No. | Sa (m <sup>2</sup> /g) | Va (cm <sup>3</sup> /g) | Dp (Å) | pre_Wsat (g/g) | pre_alpha | pre_KH (mol/(kg Pa)) | pre_SCE (kJ/kg) | pre_COPc    |
|-----|--------|----------------------------------------------------------------------------------------------------|---------|----------|------------------------|-------------------------|--------|----------------|-----------|----------------------|-----------------|-------------|
| 1   | M-11   | [Co <sub>3</sub> (ndc)-(HCOO) <sub>3</sub> (mu-3-OH)(H <sub>2</sub> O)] <sub>n</sub>               | MOF     | [15]     | 1386                   | 0.58                    | 13.6   | 0.24951872     | 0.15      | 0.006224053          | 314.8829045     | 0.720123487 |
| 2   | M-16   | [Cu <sub>2</sub> (H <sub>2</sub> btp)(H <sub>2</sub> O) <sub>2</sub> (1,2-bis(4-pyridyl)ethylene)] | MOF     | [115]    | 2.8                    | 0.095                   | 13.4   | 0.090635131    | 0.05      | 0.004043664          | 96.54617395     | 0.537984378 |
| 3   | M-17   | [Cu <sub>2</sub> (H <sub>2</sub> btp)(H <sub>2</sub> O) <sub>2</sub> (1,3-bis(4-pyridyl)propane)]  | MOF     | [115]    | 3                      | 0.083                   | 14     | 0.067709975    | 0.05      | 0.003879242          | 82.34883969     | 0.474862355 |
| 4   | M-18   | [Cu <sub>2</sub> (H <sub>2</sub> btp)(H <sub>2</sub> O) <sub>2</sub> (bipyridine)]                 | MOF     | [115]    | 1.1                    | 0.047                   | 11.2   | 0.046674019    | 0.05      | 0.000750604          | 69.73859333     | 0.3854835   |
| 5   | M-45   | {[Zn <sub>4</sub> O(bfbpdc)3-(bpy)0.5(H <sub>2</sub> O)]*(3DMF)(H <sub>2</sub> O)} <sub>n</sub>    | MOF     | [60]     | 1450                   | 0.59                    | 10.76  | 0.372540217    | 0.85      | 0.006609505          | 195.5540098     | 0.592205984 |
| 6   | M-55   | Al(OH)-(1,4-NDC)                                                                                   | MOF     | [226]    | 546                    | 0.22                    | 7.7    | 0.157690736    | 0.45      | 3.29818E-05          | 32.73527481     | 0.267158089 |
| 7   | M-62   | BIT-66(V)                                                                                          | MOF     | [238]    | 1417                   | 0.87                    | 25.8   | 0.674484598    | 0.55      | 0.000924331          | 72.19338132     | 0.446554383 |
| 8   | M-63   | BIT-72(Al)                                                                                         | MOF     | [164]    | 1618                   | 0.59                    | 6.2    | 0.520796067    | 0.55      | 0.000291971          | 60.72468358     | 0.458470082 |
| 9   | M-64   | BIT-73(Al)                                                                                         | MOF     | [164]    | 1511                   | 0.56                    | 6.6    | 0.453146089    | 0.55      | 0.003178957          | 135.4313782     | 0.589893227 |
| 10  | M-65   | BIT-74(Al)                                                                                         | MOF     | [164]    | 1394                   | 0.51                    | 5.7    | 0.421491088    | 0.45      | 0.010070306          | 245.8792651     | 0.64068368  |
| 11  | M-68   | BUT-155(Cu)                                                                                        | MOF     | [158]    | 2070                   | 0.82                    | 16     | 0.550826573    | 0.25      | 0.010413134          | 714.0419027     | 0.786163381 |
| 12  | M-69   | BUT-46A(Zr)                                                                                        | MOF     | [159]    | 1550                   | 0.69                    | 16     | 0.501991463    | 0.45      | 0.001356185          | 116.6765037     | 0.5534372   |
| 13  | M-70   | BUT-46B(Zr)                                                                                        | MOF     | [159]    | 1403                   | 0.65                    | 16     | 0.542716204    | 0.55      | 0.011816176          | 186.9381021     | 0.624245196 |
| 14  | M-71   | BUT-46F(Zr)                                                                                        | MOF     | [159]    | 1563                   | 0.71                    | 16     | 0.575758956    | 0.45      | 0.001860886          | 120.8260602     | 0.558518665 |
| 15  | M-72   | BUT-46W(Zr)                                                                                        | MOF     | [159]    | 1565                   | 0.71                    | 16     | 0.596168957    | 0.35      | 0.00048022           | 81.38156111     | 0.514960872 |
| 16  | M-89   | C <sub>4</sub> H <sub>8</sub> HoKO <sub>12</sub> Dehydrated                                        | MOF     | [55]     | 69.1                   | 0.1042                  | 3.6    | 0.187157489    | 0.05      | 0.045571523          | 273.1156377     | 0.63362781  |
| 17  | M-91   | C <sub>6</sub> H <sub>4</sub> N <sub>2</sub> O <sub>8</sub> Zn <sub>2</sub>                        | MOF     | [58]     | 960                    | 0.43                    | 10.5   | 0.253092486    | 0.95      | 0.000868563          | 97.4652781      | 0.443779024 |
| 18  | M-100  | CAU-10-H                                                                                           | MOF     | [112]    | 600                    | 0.26                    | 7      | 0.210878327    | 0.15      | 0.000500401          | 288.7913133     | 0.712780266 |
| 19  | M-111  | CAU-3(Al)                                                                                          | MOF     | [191]    | 1550                   | 0.64                    | 27     | 0.503413121    | 0.65      | 0.000378804          | 61.10058763     | 0.457526726 |
| 20  | M-113  | CAU-6(Al)                                                                                          | MOF     | [203]    | 620                    | 0.25                    | 10     | 0.327849971    | 0.05      | 0.017162068          | 264.6829384     | 0.660493601 |
| 21  | M-116  | Cd(BTTB)                                                                                           | MOF     | [212]    | 415                    | 0.19                    | 5.41   | 0.241100856    | 0.55      | 0.002547661          | 70.69559122     | 0.396411402 |
| 22  | M-120  | Co(BTTB)(AZPY)                                                                                     | MOF     | [212]    | 805                    | 0.39                    | 4.94   | 0.208230708    | 0.55      | 0.003243943          | 90.78455706     | 0.50444312  |
| 23  | M-121  | Co(BTTB)(BPY)                                                                                      | MOF     | [212]    | 843                    | 0.4                     | 4.06   | 0.033107459    | 0.75      | 0.003152568          | 59.788674       | 0.344544818 |
| 24  | M-122  | Co(BTTB)(DMBPY)                                                                                    | MOF     | [201]    | 809                    | 0.29                    | 4.41   | 0.194826543    | 0.85      | 1.32895E-05          | 23.93524263     | 0.212486514 |
| 25  | M-128  | Co-CUK-1                                                                                           | MOF     | [130]    | 510                    | 0.26                    | 13.4   | 0.293089478    | 0.15      | 0.001598389          | 404.6388848     | 0.745449686 |
| 26  | M-129  | Co-MOF-74(M)                                                                                       | MOF     | [27]     | 1314                   | 0.51                    | 12     | 0.581900113    | 0.05      | 0.085969477          | 541.4166558     | 0.630079955 |
| 27  | M-130  | Co-MOF-74(S)                                                                                       | MOF     | [27]     | 1327                   | 0.52                    | 12     | 0.730318251    | 0.05      | 0.106895179          | 559.2655415     | 0.633839703 |
| 28  | M-134  | Cr-MIL(101)                                                                                        | MOF     | [112]    | 3124                   | 1.58                    | 34     | 1.294077592    | 0.45      | 0.001534661          | 216.8688525     | 0.672933563 |
| 29  | M-135  | Cr-MIL-101-NO <sub>2</sub>                                                                         | MOF     | [112]    | 2146                   | 1.19                    | 34     | 0.813584943    | 0.45      | 0.003534228          | 150.5795635     | 0.601864215 |
| 30  | M-136  | Cr-soc-MOF-1                                                                                       | MOF     | [173]    | 4549                   | 2.1                     | 17     | 1.929653256    | 0.75      | 0.000119965          | 212.5105115     | 0.669381297 |
| 31  | M-138  | Cu <sub>2</sub> (dmcapz) <sub>2</sub>                                                              | MOF     | [219]    | 539                    | 0.227                   | 9.7    | 0.222083742    | 0.35      | 0.001958672          | 115.1230474     | 0.524895284 |
| 32  | M-143  | CuEBTC                                                                                             | MOF     | [192]    | 1434                   | 0.65                    | 9      | 0.205768957    | 0.05      | 0.00238856           | 239.1782526     | 0.652859354 |
| 33  | M-144  | CuMBTC                                                                                             | MOF     | [192]    | 1471                   | 0.79                    | 9      | 0.207238333    | 0.05      | 0.006545307          | 277.1515846     | 0.66085683  |
| 34  | M-148  | DMOF                                                                                               | MOF     | [64]     | 1960                   | 0.58                    | 7.5    | 0.096476321    | 0.25      | 0.000481642          | 151.5177996     | 0.572663938 |

|    |       |                                        |     |       |      |       |       |             |      |             |             |             |
|----|-------|----------------------------------------|-----|-------|------|-------|-------|-------------|------|-------------|-------------|-------------|
| 35 | M-149 | DMOF(Zn)-A                             | MOF | [83]  | 760  | 0.33  | 4.8   | 0.289369046 | 0.35 | 0.000481108 | 92.48347303 | 0.527792948 |
| 36 | M-150 | DMOF(Zn)-Br                            | MOF | [83]  | 1315 | 0.53  | 5     | 0.061518844 | 0.35 | 0.003628163 | 73.60828348 | 0.426118439 |
| 37 | M-151 | DMOF(Zn)-N                             | MOF | [83]  | 1420 | 0.57  | 5.7   | 0.034977535 | 0.05 | 0.000127082 | 39.44716306 | 0.231325    |
| 38 | M-152 | DMOF(Zn)-NH3                           | MOF | [64]  | 2010 | 0.58  | 7.5   | 0.111401352 | 0.05 | 0.001941017 | 147.8355781 | 0.592069944 |
| 39 | M-153 | DMOF-Cl2                               | MOF | [83]  | 1175 | 0.45  | 3.8   | 0.074636585 | 0.35 | 0.001164568 | 59.45790027 | 0.380008761 |
| 40 | M-154 | DMOF-NO2                               | MOF | [83]  | 1310 | 0.53  | 6.2   | 0.130028213 | 0.45 | 0.004132799 | 86.47111627 | 0.498233964 |
| 41 | M-155 | DMOF-OH                                | MOF | [83]  | 1130 | 0.54  | 7.5   | 0.076392066 | 0.15 | 0.000792655 | 84.25750695 | 0.389528352 |
| 42 | M-156 | DMOF-TM(Co)                            | MOF | [201] | 1052 | 0.49  | 3.5   | 0.369958762 | 0.35 | 0.001549415 | 124.585621  | 0.583953256 |
| 43 | M-157 | DMOF-TM(Cu)                            | MOF | [201] | 1041 | 0.46  | 3.5   | 0.38255236  | 0.55 | 0.001210008 | 82.11540595 | 0.478470767 |
| 44 | M-158 | DMOF-TM(Ni)                            | MOF | [201] | 1095 | 0.48  | 3.5   | 0.363541936 | 0.45 | 0.001434098 | 79.32536156 | 0.440588286 |
| 45 | M-159 | DMOF-TM1(Zn)                           | MOF | [196] | 1210 | 0.53  | 7.5   | 0.272091276 | 0.45 | 7.73409E-06 | 41.94777085 | 0.322973119 |
| 46 | M-160 | DMOF-TM2(Zn)                           | MOF | [196] | 1050 | 0.51  | 3.5   | 0.41420566  | 0.25 | 0.001105497 | 651.4632752 | 0.777766251 |
| 47 | M-162 | DUT-4                                  | MOF | [41]  | 1360 | 0.79  | 8.5   | 0.490154175 | 0.55 | 0.003003968 | 118.720018  | 0.573726553 |
| 48 | M-163 | DUT-51(Zr)                             | MOF | [190] | 2106 | 1.08  | 18.8  | 0.561614348 | 0.65 | 0.000879168 | 58.25226878 | 0.430095058 |
| 49 | M-164 | DUT-52(Zr)                             | MOF | [216] | 1399 | 0.54  | 8.59  | 0.270214523 | 0.35 | 0.000719113 | 132.8698834 | 0.530917978 |
| 50 | M-165 | DUT-53(Hf)                             | MOF | [216] | 1097 | 0.31  | 11.23 | 0.199770179 | 0.35 | 0.000753169 | 104.2959145 | 0.532993431 |
| 51 | M-166 | DUT-67                                 | MOF | [75]  | 1560 | 0.6   | 16.6  | 0.504997046 | 0.25 | 0.007689695 | 655.6014828 | 0.782689143 |
| 52 | M-167 | DUT-67(Hf)                             | MOF | [162] | 810  | 0.33  | 14.2  | 0.286009356 | 0.45 | 0.002471801 | 96.47403211 | 0.425973447 |
| 53 | M-168 | DUT-68(Hf)                             | MOF | [162] | 749  | 0.34  | 27.7  | 0.284947589 | 0.45 | 0.003017055 | 111.4112898 | 0.517710974 |
| 54 | M-169 | DUT-68(Zr)                             | MOF | [162] | 891  | 0.41  | 27.7  | 0.34236205  | 0.45 | 0.003671658 | 144.8560679 | 0.605538247 |
| 55 | M-170 | DUT-69(Hf)                             | MOF | [162] | 450  | 0.22  | 5     | 0.182964385 | 0.15 | 0.000780182 | 233.4986197 | 0.685463791 |
| 56 | M-171 | DUT-69(Zr)                             | MOF | [162] | 560  | 0.31  | 5     | 0.213884399 | 0.15 | 0.000161455 | 283.0259905 | 0.704729046 |
| 57 | M-172 | DUT-84(Zr)                             | MOF | [216] | 637  | 0.27  | 11.14 | 0.138362356 | 0.35 | 5.24619E-05 | 50.43254566 | 0.328518308 |
| 58 | M-173 | ED-ZIF-8                               | MOF | [3]   | 1428 | 0.75  | 45.3  | 0.079480738 | 0.95 | 0.004927734 | 96.62050942 | 0.44530983  |
| 59 | M-182 | kag-MOF-1(Zn)                          | MOF | [170] | 210  | 0.12  | 4.6   | 0.119742128 | 0.05 | 0.008131168 | 164.4107911 | 0.598592305 |
| 60 | M-183 | KMF-1(Al)                              | MOF | [240] | 1130 | 0.473 | 6     | 0.432039995 | 0.15 | 0.004663643 | 639.8048207 | 0.795003791 |
| 61 | M-186 | LA <sup>1</sup> -Zr6 <sup>8</sup> -csq | MOF | [182] | 3150 | 2.18  | 47    | 0.393603212 | 0.65 | 0.001377992 | 85.81792939 | 0.480007165 |
| 62 | M-187 | LA <sup>1</sup> -Zr6 <sup>8</sup> -flu | MOF | [182] | 2850 | 1.31  | 38.6  | 0.234264781 | 0.75 | 5.33039E-05 | 33.11356145 | 0.273189966 |
| 63 | M-199 | MAF-4.23-7.77                          | MOF | [197] | 1870 | 0.64  | 11    | 0.415833165 | 0.55 | 0.003671321 | 147.1084682 | 0.594253079 |
| 64 | M-200 | MAF-4.49-7.51                          | MOF | [197] | 1870 | 0.65  | 11    | 0.427889064 | 0.55 | 0.00367132  | 149.3782905 | 0.593929469 |
| 65 | M-201 | MAF-4.76-7.24                          | MOF | [197] | 1870 | 0.64  | 11    | 0.415833165 | 0.55 | 0.003671321 | 147.1084682 | 0.594253079 |
| 66 | M-202 | MAF-7(Zn)                              | MOF | [197] | 1874 | 0.67  | 11.2  | 0.434262982 | 0.35 | 0.00529625  | 243.5243755 | 0.687150912 |
| 67 | M-205 | Mg-CPO-27                              | MOF | [112] | 1400 | 0.65  | 11    | 0.638881405 | 0.05 | 0.026434324 | 840.1181417 | 0.705159799 |
| 68 | M-206 | Mg-CUK-1                               | MOF | [130] | 580  | 0.28  | 13.4  | 0.36002771  | 0.25 | 0.001176993 | 610.7910158 | 0.751140847 |
| 69 | M-207 | Mg-MOF-74                              | MOF | [95]  | 1525 | 0.62  | 11    | 0.659733295 | 0.05 | 0.042000019 | 547.4956388 | 0.597875254 |
| 70 | M-210 | MIL-100(Cr)                            | MOF | [50]  | 1871 | 1.02  | 29    | 0.717571608 | 0.65 | 0.008493215 | 151.6632102 | 0.601994416 |
| 71 | M-213 | MIL-100(Cr)-DEG                        | MOF | [34]  | 580  | 0.5   | 12    | 0.414898058 | 0.35 | 0.002852496 | 194.8096466 | 0.67739585  |
| 72 | M-214 | MIL-100(Cr)-EG                         | MOF | [34]  | 710  | 0.47  | 12    | 0.42687522  | 0.35 | 0.005101    | 202.5155396 | 0.689732694 |
| 73 | M-215 | MIL-100(Cr)-EN                         | MOF | [34]  | 640  | 0.42  | 15    | 0.359748986 | 0.35 | 0.00560422  | 261.9542019 | 0.680752921 |
| 74 | M-216 | MIL-100(Cr)-TEG                        | MOF | [34]  | 680  | 0.53  | 12    | 0.332861284 | 0.35 | 0.001673317 | 144.1137544 | 0.602960339 |
| 75 | M-217 | MIL-100(Fe)                            | MOF | [41]  | 1549 | 0.82  | 29    | 0.831269175 | 0.35 | 0.006993703 | 251.7732251 | 0.657045977 |
| 76 | M-218 | MIL-100V                               | MOF | [125] | 1203 | 0.74  | 11    | 0.165296484 | 0.35 | 0.01044834  | 200.3882269 | 0.557774774 |
| 77 | M-219 | MIL-101(Al)-NH2                        | MOF | [199] | 3363 | 1.67  | 25    | 0.276163646 | 0.05 | 0.003884156 | 379.7603801 | 0.706928059 |

|     |       |                    |     |       |      |       |      |             |      |             |             |             |
|-----|-------|--------------------|-----|-------|------|-------|------|-------------|------|-------------|-------------|-------------|
| 78  | M-220 | MIL-101(Al)-URPh   | MOF | [199] | 1555 | 0.83  | 18   | 0.335659036 | 0.05 | 0.008327194 | 522.090608  | 0.712135555 |
| 79  | M-224 | MIL-101-NH2        | MOF | [42]  | 2509 | 1.27  | 34   | 1.049898489 | 0.45 | 0.000139467 | 85.69115407 | 0.541487267 |
| 80  | M-225 | MIL-101-SO3H       | MOF | [42]  | 1920 | 0.94  | 34   | 0.752328015 | 0.35 | 0.011016428 | 397.1485264 | 0.72357068  |
| 81  | M-226 | MIL-101V           | MOF | [125] | 2705 | 1.4   | 21   | 0.273064751 | 0.05 | 0.007336733 | 458.3991198 | 0.713951849 |
| 82  | M-231 | MIL-125-NH2        | MOF | [112] | 1220 | 0.55  | 12   | 0.370744936 | 0.15 | 0.001319363 | 655.0996777 | 0.761496126 |
| 83  | M-232 | MIL-160            | MOF | [2]   | 1070 | 0.398 | 5    | 0.375054105 | 0.05 | 0.009720631 | 564.8764743 | 0.741874528 |
| 84  | M-245 | MIL-53(Al)ht       | MOF | [105] | 1489 | 0.56  | 8.5  | 0.1106706   | 0.05 | 0.002936971 | 132.7091141 | 0.580310166 |
| 85  | M-246 | MIL-53(Al)it       | MOF | [105] | 1031 | 0.72  | 34   | 0.235053064 | 0.65 | 0.000182862 | 71.97743111 | 0.485264458 |
| 86  | M-247 | MIL-53(Al)-NH2     | MOF | [176] | 940  | 0.37  | 13   | 0.111487594 | 0.05 | 0.009212304 | 150.156807  | 0.57529795  |
| 87  | M-250 | MIL-53(Al)-TDC     | MOF | [194] | 1150 | 0.48  | 8.2  | 0.390831341 | 0.35 | 0.000911103 | 93.6371178  | 0.53293766  |
| 88  | M-253 | MIL-53(Ga)         | MOF | [176] | 1230 | 0.47  | 20   | 0.098515589 | 0.05 | 0.007288339 | 135.6566489 | 0.568885779 |
| 89  | M-255 | MIL-68(In)         | MOF | [176] | 1110 | 0.42  | 16   | 0.30176478  | 0.55 | 0.002275906 | 95.89965888 | 0.472007539 |
| 90  | M-256 | MIL-68(In)-NH2     | MOF | [176] | 850  | 0.3   | 16   | 0.33086807  | 0.45 | 0.000595992 | 76.45041234 | 0.390114215 |
| 91  | M-257 | MIL-91(Ti)         | MOF | [217] | 403  | 0.16  | 4    | 0.211999733 | 0.05 | 0.020037195 | 302.7632102 | 0.65686031  |
| 92  | M-258 | MIP-200            | MOF | [129] | 1000 | 0.4   | 13   | 0.422486987 | 0.15 | 0.016003478 | 640.6507308 | 0.776882257 |
| 93  | M-268 | MUF-77(Zn)-butyl   | MOF | [215] | 3250 | 1.21  | 13.6 | 0.24197643  | 0.85 | 0.003041738 | 89.12011291 | 0.505742449 |
| 94  | M-270 | MUF-77(Zn)-ethyl   | MOF | [215] | 3600 | 1.55  | 18.5 | 0.271524053 | 0.75 | 0.003352474 | 135.3841803 | 0.590401012 |
| 95  | M-271 | MUF-77(Zn)-hexyl   | MOF | [215] | 2170 | 1     | 11.2 | 0.139323695 | 0.85 | 0.00577935  | 109.6876333 | 0.518403189 |
| 96  | M-272 | MUF-77(Zn)-methyl  | MOF | [215] | 3600 | 1.85  | 21.1 | 0.217927835 | 0.75 | 0.001600345 | 91.34753506 | 0.497726356 |
| 97  | M-277 | Ni(BTTB)           | MOF | [212] | 391  | 0.2   | 4.3  | 0.014994921 | 0.05 | 0.001517826 | 18.85713016 | 0.253990829 |
| 98  | M-291 | Ni-CUK-1           | MOF | [130] | 520  | 0.26  | 13.4 | 0.299307085 | 0.15 | 0.001361331 | 443.0044427 | 0.757004006 |
| 99  | M-292 | Ni-DOBDC           | MOF | [81]  | 639  | 0.362 | 11   | 0.514127935 | 0.05 | 0.043203375 | 589.5520791 | 0.621897843 |
| 100 | M-294 | NU-1000(Zr)        | MOF | [185] | 2320 | 1.4   | 31   | 1.032751135 | 0.75 | 0.000312041 | 74.65595726 | 0.495878478 |
| 101 | M-295 | NU-1000(Zr)-SALI-1 | MOF | [185] | 1710 | 1     | 30   | 0.85008459  | 0.75 | 0.002328516 | 125.7127841 | 0.570357104 |
| 102 | M-296 | NU-1000(Zr)-SALI-7 | MOF | [185] | 900  | 0.6   | 28   | 0.436277795 | 0.85 | 0.00052576  | 68.02446053 | 0.456290224 |
| 103 | M-297 | NU-1000(Zr)-SALI-9 | MOF | [185] | 870  | 0.6   | 28   | 0.354930087 | 0.85 | 0.000767613 | 65.72177359 | 0.36875401  |
| 104 | M-303 | PIZOF-2            | MOF | [75]  | 2080 | 0.88  | 17.6 | 0.686767031 | 0.75 | 0.000492699 | 65.06657036 | 0.451336442 |
| 105 | M-306 | SALI-5(Zr)         | MOF | [180] | 1270 | 0.85  | 29   | 0.618263604 | 0.85 | 0.005450689 | 177.0553796 | 0.629126723 |
| 106 | M-307 | SALI-9(Zr)         | MOF | [180] | 900  | 0.63  | 27.5 | 0.403002865 | 0.85 | 0.000121931 | 110.2837833 | 0.583672804 |
| 107 | M-308 | SALI-9(Zr)         | MOF | [180] | 1190 | 0.87  | 29.6 | 0.679793914 | 0.85 | 0.001320842 | 158.07622   | 0.598943682 |
| 108 | M-309 | SALI-BA(Zr)        | MOF | [180] | 2005 | 1.21  | 27.8 | 0.945049254 | 0.85 | 0.007646528 | 176.237861  | 0.591872315 |
| 109 | M-314 | SIM-1              | MOF | [112] | 470  | 0.23  | 6    | 0.131705849 | 0.35 | 0.000493221 | 78.59399429 | 0.50489559  |
| 110 | M-316 | SNU-80             | MOF | [14]  | 456  | 0.18  | 7    | 0.009249037 | 0.05 | 0.018177824 | 101.2628876 | 0.256217943 |
| 111 | M-322 | UiO-66             | MOF | [75]  | 1290 | 0.49  | 8.4  | 0.42493345  | 0.35 | 0.001035108 | 140.7162198 | 0.605627942 |
| 112 | M-323 | UiO-66(Hf)-(OH)2   | MOF | [167] | 920  | 0.4   | 5.85 | 0.285866656 | 0.05 | 0.00229884  | 424.5606883 | 0.713143264 |
| 113 | M-328 | UiO-66(Zr)-(OH)2   | MOF | [167] | 1230 | 0.56  | 5.85 | 0.312104671 | 0.05 | 0.00283963  | 539.3887043 | 0.748510797 |
| 114 | M-340 | UiO-66-NH2         | MOF | [64]  | 1040 | 0.57  | 6    | 0.386400563 | 0.15 | 0.012404728 | 632.4070428 | 0.768391886 |
| 115 | M-344 | UMCM-1             | MOF | [64]  | 6010 | 2.41  | 32   | 0.275598201 | 0.85 | 0.00176389  | 101.4474128 | 0.512819114 |
| 116 | M-349 | Y-fum-fcu-MOF      | MOF | [7]   | 691  | 0.28  | 8    | 0.343403216 | 0.05 | 0.003042732 | 635.6276127 | 0.739290341 |
| 117 | M-358 | Zn(BTTB)           | MOF | [212] | 447  | 0.25  | 4.47 | 0.20369296  | 0.75 | 0.00012173  | 100.432305  | 0.485530293 |
| 118 | M-359 | Zn(BTTB)(AZPY)     | MOF | [212] | 647  | 0.36  | 4.94 | 0.191637331 | 0.55 | 0.003282272 | 81.91009358 | 0.500479542 |
| 119 | M-360 | Zn(BTTB)(BDC)      | MOF | [212] | 441  | 0.21  | 4.24 | 0.089425375 | 0.05 | 0.000602022 | 111.7589389 | 0.548679661 |
| 120 | M-361 | Zn(BTTB)(BPY)      | MOF | [212] | 841  | 0.38  | 4.06 | 0.247242539 | 0.75 | 0.002106975 | 111.539838  | 0.552127395 |



|     |       |                           |         |       |       |       |      |             |      |             |             |             |
|-----|-------|---------------------------|---------|-------|-------|-------|------|-------------|------|-------------|-------------|-------------|
| 121 | M-362 | Zn(BTTB)(DMBPY)           | MOF     | [201] | 749   | 0.27  | 4.41 | 0.207141293 | 0.85 | 0.000104112 | 57.99341168 | 0.354420011 |
| 122 | M-373 | Zn2C14N2O8H4              | MOF     | [66]  | 312.7 | 0.146 | 5.2  | 0.179712435 | 0.15 | 0.008308243 | 273.253582  | 0.678269255 |
| 123 | M-378 | Zn4O(dmcapz)3             | MOF     | [72]  | 840   | 0.45  | 6    | 0.354870117 | 0.75 | 0.000114592 | 113.8339806 | 0.560816242 |
| 124 | M-380 | Zn-BTTB-DMBPY             | MOF     | [84]  | 749   | 0.269 | 4.41 | 0.211270567 | 0.85 | 9.75632E-05 | 34.6289003  | 0.343717623 |
| 125 | M-384 | Zr-Fum HT                 | MOF     | [242] | 1020  | 0.553 | 7.5  | 0.415148428 | 0.15 | 0.008491119 | 702.7812801 | 0.780178843 |
| 126 | M-385 | Zr-MOF-801-P              | MOF     | [75]  | 990   | 0.45  | 7.4  | 0.352231002 | 0.15 | 0.005382607 | 598.5436157 | 0.768710935 |
| 127 | M-386 | Zr-MOF-801-SC             | MOF     | [75]  | 690   | 0.27  | 7.4  | 0.27008494  | 0.05 | 0.00057885  | 370.2304643 | 0.712318529 |
| 128 | M-387 | Zr-MOF-802                | MOF     | [75]  | 20    | 0.01  | 5.6  | 0.084818536 | 0.05 | 0.002835949 | 98.1101677  | 0.52200308  |
| 129 | M-388 | Zr-MOF-804                | MOF     | [75]  | 1145  | 0.46  | 7.2  | 0.338986061 | 0.45 | 0.003965923 | 159.9588229 | 0.618724459 |
| 130 | M-389 | Zr-MOF-805                | MOF     | [75]  | 1230  | 0.48  | 9.5  | 0.337840949 | 0.35 | 0.000910883 | 106.5955013 | 0.553469925 |
| 131 | M-390 | Zr-MOF-806                | MOF     | [75]  | 2220  | 0.85  | 12.6 | 0.267134771 | 0.05 | 0.016359846 | 262.4387094 | 0.652968862 |
| 132 | M-391 | Zr-MOF-808                | MOF     | [75]  | 2060  | 0.84  | 18.4 | 0.573868155 | 0.35 | 0.009819092 | 374.5037641 | 0.728567496 |
| 133 | M-392 | Zr-MOF-841                | MOF     | [75]  | 1390  | 0.53  | 9.2  | 0.481943765 | 0.25 | 0.002072541 | 566.8002898 | 0.783816038 |
| 134 | C-4   | AB-COF                    | COF     | [133] | 1125  | 0.47  | 13   | 0.348029897 | 0.25 | 0.006541188 | 461.5690599 | 0.753445043 |
| 135 | C-14  | ATFG-COF                  | COF     | [133] | 520   | 0.5   | 13   | 0.292517069 | 0.25 | 0.00224043  | 379.8108419 | 0.746984045 |
| 136 | C-15  | bipy -CTF500              | COF     | [138] | 1548  | 0.71  | 8    | 0.426992511 | 0.35 | 0.000916257 | 97.4978498  | 0.555580333 |
| 137 | C-19  | CE-1                      | COF     | [137] | 960   | 0.97  | 8.2  | 0.298752536 | 0.75 | 0.00046685  | 78.96493589 | 0.489121476 |
| 138 | C-20  | CE-2                      | COF     | [137] | 588   | 0.47  | 7.8  | 0.094549019 | 0.35 | 0.000424959 | 75.90570676 | 0.496575648 |
| 139 | C-21  | CE-3                      | COF     | [137] | 540   | 0.43  | 8.6  | 0.086502789 | 0.35 | 0.000425951 | 63.46249372 | 0.48597969  |
| 140 | C-22  | COF-432                   | COF     | [244] | 895   | 0.43  | 8    | 0.2935057   | 0.35 | 0.000481202 | 93.1078138  | 0.537633275 |
| 141 | C-46  | TpHZ                      | COF     | [245] | 422   | 0.56  | 7    | 0.379123632 | 0.35 | 0.002119662 | 169.719018  | 0.633003019 |
| 142 | C-56  | trzn-COF                  | COF     | [134] | 408.5 | 0.21  | 23   | 0.068768591 | 0.35 | 0.001093217 | 63.31739479 | 0.429395162 |
| 143 | Z-2   | H0.34Na0.06Al0.4Si47.6O96 | Zeolite | [21]  | 340   | 0.24  | 4    | 0.15335972  | 0.05 | 0.003189983 | 170.2615093 | 0.631546445 |
| 144 | Z-3   | HiSiv 3000 Zeolite        | Zeolite | [76]  | 282   | 0.1   | 15.2 | 0.038703178 | 0.35 | 0.001634238 | 55.04164738 | 0.383277662 |
| 145 | Z-4   | K6Na6Al12O48              | Zeolite | [21]  | 756   | 0.57  | 4    | 0.182682269 | 0.05 | 0.020857254 | 269.6208504 | 0.655765652 |
| 146 | Z-5   | MCM-41                    | Zeolite | [50]  | 882   | 0.63  | 34   | 0.551029723 | 0.75 | 0.000720482 | 85.12147326 | 0.397144345 |
| 147 | Z-6   | NaX                       | Zeolite | [128] | 1010  | 0.31  | 10.5 | 0.325366906 | 0.05 | 0.033186679 | 417.3203987 | 0.693416411 |
| 148 | Z-7   | Na-ZSM-5                  | Zeolite | [50]  | 366   | 0.18  | 6    | 0.303698863 | 0.05 | 0.017477747 | 323.698955  | 0.672911956 |

## S2. Structural characteristics of experimental adsorbents

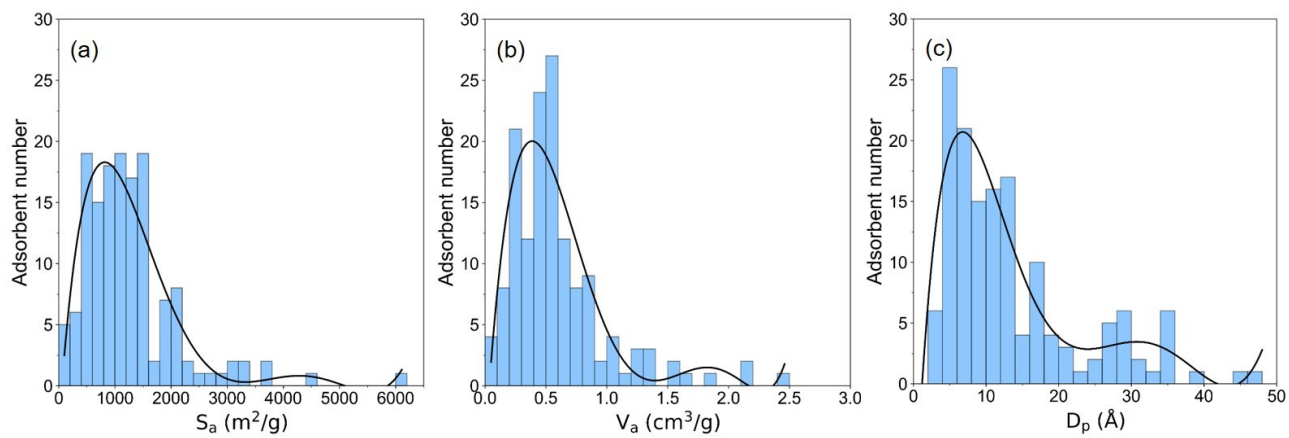

**Figure S1.** The distribution statistic of structural characteristics including (a) accessible surface area ( $S_a$ ), (b) available pore volume ( $V_a$ ) and (c) pore diameter ( $D_p$ ) of 148 adsorbents

### S3. Machine learning algorithms and details

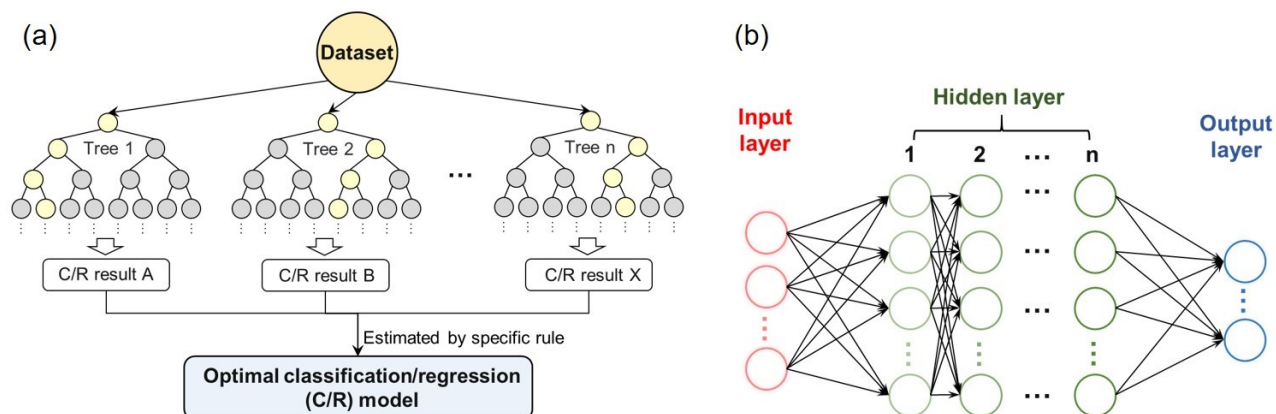

**Figure S2.** Schematic diagram of (a) random forest (RF) and (b) artificial neural network (ANN) model

#### ***Random forest (RF) algorithm***

Firstly, it should be known that decision trees (DT) are a non-parametric supervised learning method used for classification and regression, which predicts the value of a target variable by learning simple decision rules inferred from the data features. Then, RF algorithm is originally inspired by the classic DT method, and it can be viewed as the improvement and optimization of DT. RF is an ensemble of DT that fits a number of classifying DT on various sub-samples of the dataset and uses averaging to improve the predictive accuracy and control over-fitting, overall, in a better prediction. Specifically, as Figure S2a shows, when training an RF model, multiple samples and several features are randomly selected and then the features with optimal segmentation were categorized as nodes for the establishment of DT. Repeating the process  $n$  times to build  $n$  DT, this is developing an uncorrelated forest. RF was estimated by a specific rule (usually average) based on the results of all trees, whose estimation on the whole group makes the model generalization ability stronger than any single tree. Tree indicators utilize numerical qualities randomly assigned to class names in an RF classifier, while a gathering of information parameters or self-assertively picks parameters at every node to grow a tree in an RF regression.<sup>1</sup>

#### ***Artificial neural network (ANN) algorithm***

Artificial neural network (ANN) is a bio-inspired algorithm developed by mimicking neural systems of organic life, which is one of the most widely applied examples of machine learning. Multi-layer perceptron (MLP) is a type of feedforward artificial neural network, which consists of an input layer, an output layer and at least one hidden layer (schematic diagram in Figure S2b). As with any other machine learning algorithm, the goal of ANN is to predict a response given a set of variables for either classification or regression. There can be one or more non-linear layers, called hidden layers, between the input and the output layer, and each hidden layer consists of multiple neurons (or nodes), In this fully connected network, every neuron is connected to all neurons of the next layer. Each neuron is assigned an activation function (a non-linear function) and a weight, which are applied to handle the weighted summation of the outputs of the preceding layer. The process is done until the output layer is reached, which consists of neurons with a linear (for regression) or step (for classification) activation function. It should be noted that the output of each node is applied to different weights into the summations that are received by the nodes in the next layer. The optimal weights are found using the backpropagation (BP) algorithm.<sup>2</sup> The weights of each node are initialized and then the prediction is tested for a single input or a set of inputs. The error of this prediction is then calculated (i.e. the loss function) and used to calculate the partial derivative of model error with respect to each weight in the network. The calculation of these derivatives is backpropagation and can be used in an optimization function that minimizes the loss function.<sup>3</sup>

### ***Hyperparameter optimization and model setting***

In this work, both ANN and RF models were deployed by the Scikit-learn module using Python codes.<sup>4</sup> There are many so-called “hyper-parameters” which influence the final prediction effect of models. For example, the number of trees in a forest (`n_estimators`), the minimum number of samples required to split an internal node (`min_samples_split`) and being at a leaf node (`min_samples_leaf`) in trees are the most critical parameter affecting the RF model performance; the number of hidden layer and neurons in each layer (`hidden_layer_sizes`), the activation function for the hidden layer (`activation`) are the most key for ANN model. All hyper-parameters of RF and ANN Regressor were listed in Table S5, and their specific meanings can be found on the website of Scikit-learn (<https://scikit-learn.org/>). The key parameters (i.e., adjustable parameter in table) of models were optimized by grid-search (i.e.,

ergodic) within the given parameter range and five-fold cross-validation. During the process of hyper-parameters optimization, data were divided into five-folds, and four-fifths of the data were selected randomly as a training set while one-fifth of the data as a test set. The ML model was run five times for each group value of hyper-parameters by the five-fold cross-validation, in which the average determinate coefficient ( $R^2$ ) of test sets in five-fold cross-validation was adopted to indicate the performance of the model built by different hyper-parameter groups. The hyper-parameter group with the maximum average  $R^2$  will be the optimal hyper-parameters of learners for deploying models further.

$$R^2 = 1 - \frac{\sum_{i=1}^n (y_i - p_i)^2}{\sum_{i=1}^n (y_i - \bar{p}_i)^2} \quad (\text{Eq. S1})$$

Where  $n$ ,  $y_i$ ,  $p_i$ , and  $\bar{p}_i$  refer to the number of data, target value, corresponding ML predicted value and average predicted value, respectively. It should be noted that all data used in models are normalized to eliminate the dimensional effects of data. Through testing in advance, it is determined that the linear normalization (MinMaxScaler) and mean normalization (StandardScaler) method are the best on RF and ANN, respectively. MinMaxScaler can scale the data between a given minimum and maximum value (0-1 in here), and the conversion formula is as follow.

$$x_{sca} = \frac{x - x_{\min}}{x_{\max} - x_{\min}} \quad (\text{Eq. S2})$$

Where  $x_{sca}$ ,  $x$ ,  $x_{\min}$ ,  $x_{\max}$  are the scaled data, original data, minimum of data and maximum of data, respectively. For another, after StandardScaler processing, the data conform to the standard normal distribution (the mean is 0 and the standard deviation equals 1).

$$x_{sca} = \frac{x - x_{\text{mea}}}{x_{\text{std}}} \quad (\text{Eq. S3})$$

Where  $x_{\text{mea}}$  and  $x_{\text{std}}$  are the mean of data, the standard deviation of data, respectively.

ML models aiming to predict water adsorption isotherms using structure characteristics and adsorption pressure (ML S-I: one group data of [ $S_a$ ,  $V_a$ ,  $D_p$ ,  $P$ ] predict  $W$ ), as well as predict adsorption cooling

performance using isotherm features as descriptors (ML I-P: one group data of  $[W_{\text{sat}}, \alpha, K_H]$  predict SCE and  $\text{COP}_C$ ) are expected to be realized. During the deployment of the model, 80% of samples in the available dataset were randomly chosen as the training dataset and the rest 20% served as the test dataset. The accuracy of models was assessed using  $R^2$ , root mean squared error (RMSE) and mean absolute error (MAE). The calculation formula of RMSE and MAE are as follows.

$$\text{RMSE} = \sqrt{\frac{1}{n} \sum_{i=1}^n (y_i - p_i)^2} \quad (\text{Eq. S4})$$

$$\text{MAE} = \frac{1}{n} \sum_{i=1}^n |y_i - p_i| \quad (\text{Eq. S5})$$

Besides, the relative importance of descriptors for the prediction target of RF models is provided by the fitted attribute “feature\_importances” in RF regressor, and they are computed as the mean and standard deviation of accumulation of the impurity decrease within each tree.

**Table S5.** The setting of random forest (RF) and artificial neural network (ANN) model

| Model | Learner                 | Hyper-parameter      |                                                                                                                                                                                                                                                                                | Parameter search mode               | Data normalization  |
|-------|-------------------------|----------------------|--------------------------------------------------------------------------------------------------------------------------------------------------------------------------------------------------------------------------------------------------------------------------------|-------------------------------------|---------------------|
| RF    | Random Forest Regressor | Default parameter    | max_depth=None,<br>min_weight_fraction_leaf=0.0,<br>max_features=1.0,<br>max_leaf_nodes=None,<br>min_impurity_decrease=0.0,<br>bootstrap=True,<br>oob_score=False,<br>n_jobs=None,<br>random_state=1,<br>verbose=0,<br>warm_start=False,<br>ccp_alpha=0.0,<br>max_samples=None | GridSearchCV(cv=5, scoring='r2', *) | MinMaxScaler([0,1]) |
|       |                         | Adjustable parameter | n_estimators=[10, 20, 50, 100, 200, 300],<br>criterion=['mse', 'mae'],<br>min_samples_leaf=1-10,<br>min_samples_split=2-10                                                                                                                                                     |                                     |                     |

|     |               |                      |                                                                                                                                                                                                                                                                                                                                                   |                                     |                  |
|-----|---------------|----------------------|---------------------------------------------------------------------------------------------------------------------------------------------------------------------------------------------------------------------------------------------------------------------------------------------------------------------------------------------------|-------------------------------------|------------------|
| ANN | MLP Regressor | Default parameter    | <pre> alpha=0.0001, batch_size='auto', learning_rate='constant', power_t=0.5, max_iter=10000, shuffle=True, random_state=1, tol=0.0001, verbose=False, warm_start=False, momentum=0.9, nesterovs_momentum=True, early_stopping=False, validation_fraction=0.1, beta_1=0.9, beta_2=0.999, epsilon=1e-08, n_iter_no_change=10, max_fun=15000 </pre> | GridSearchCV(cv=5, scoring='r2', *) | StandardScaler() |
|     |               | Adjustable parameter | <pre> hidden_layer_sizes=[layers=1-6, neurons=2-50], activation=['identity', 'logistic', 'tanh', 'relu'], solver=['sgd', 'adam'], learning_rate_init=[0.1, 0.01, 0.001, 0.0001] </pre>                                                                                                                                                            |                                     |                  |

#### S4. Adsorption cooling performance calculation

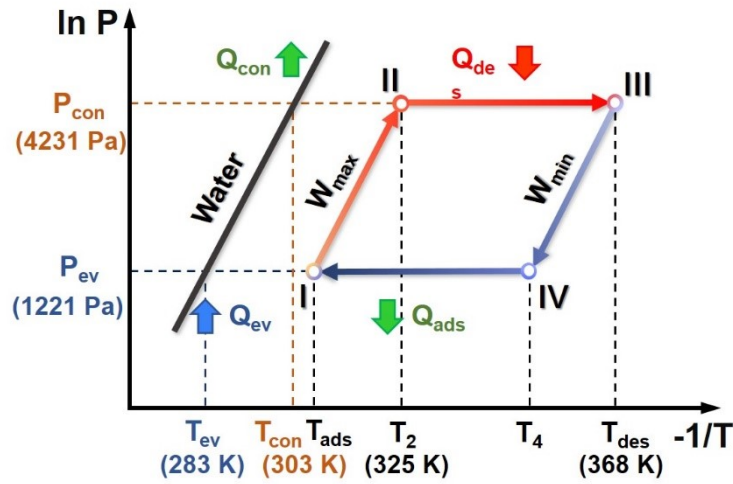

**Figure S3.** Diagram of the thermodynamic cycle for adsorption cooling. The cycle is consisting of four steps: isosteric heating (I-II), isobaric desorption (II-III), isosteric cooling (III-IV) and isobaric adsorption (IV-I).

As shown in Figure S3, the basic thermodynamic cycle consists of four steps: isosteric heating (I-II), isobaric desorption (II-III), isosteric cooling (III-IV) and isobaric adsorption (IV-I). The typical working conditions during the AC working process were adopted in this work.<sup>5-6</sup> The evaporation temperature ( $T_{ev}$ ) and condensation temperature ( $T_{con}$ ) commonly used in the literature are 283 K and 303 K, respectively. The adsorption temperature ( $T_{ads}$ ) is usually equal to  $T_{con}$ , which is close to the ambient temperature. The desorption temperature ( $T_{des}$ ) is limited to the low-grade heat source, and it was fixed at 368 K in this work.  $T_2$  is the minimum desorption temperature, which can be obtained according to the generalized Trouton's rule<sup>7</sup>, i.e. Evaporation pressure ( $P_{ev}$ ) and condensation pressure ( $P_{con}$ ) are the saturation pressure of ammonia at  $T_{ev}$  and  $T_{con}$ , respectively.

Based on the basic thermodynamic cycle diagram of AC, the cooling performance including the coefficient of performance for cooling ( $COP_C$ ) and the specific cooling effects (SCE) of adsorbent/water working pairs can be calculated at typical cooling working conditions. SCE is the energy transferred for cooling by ammonia in the evaporator (i.e.  $Q_{ev}$ ).  $COP_C$  describes the thermodynamic efficiency of AC that is defined as the output cooling capacity (i.e.  $Q_{ev}$ ) divided



by the total heat input to the system (i.e.  $Q_{\text{input}}$ , and it approximately equals  $Q_{\text{des}}$ ).

$$\text{SCE} = Q_{\text{ev}} \quad (\text{Eq. S6})$$

$$\text{COP}_c = \frac{\text{SCE}}{Q_{\text{input}}} = \frac{Q_{\text{ev}}}{Q_{\text{des}}} \quad (\text{Eq. S7})$$

Where  $Q_{\text{ev}}$  is the energy taken up in the evaporator, and  $Q_{\text{input}}$  is the heat energy from low-grade heat sources for desorption of adsorbent ( $Q_{\text{des}}$ ).

$$Q_{\text{ev}} = \Delta W \Delta_{\text{vap}} H(T_{\text{ev}}) + \Delta W \int_{T_{\text{con}}}^{T_{\text{ev}}} C_p^{\text{ref}}(T) dT \quad (\text{Eq. S8})$$

$$\begin{aligned} Q_{\text{des}} &= Q_{\text{I-II}} + Q_{\text{II-III}} \\ &= \left[ \int_{T_{\text{ads}}}^{T_2} C_p^{\text{ad}}(T) dT + W_{\text{max}} \int_{T_{\text{ads}}}^{T_2} C_p^{\text{ref}}(T) dT \right] + \left[ \int_{T_2}^{T_{\text{des}}} C_p^{\text{ad}}(T) dT + \int_{T_2}^{T_{\text{des}}} W(T) C_p^{\text{ref}}(T) dT + \int_{W_{\text{max}}}^{W_{\text{min}}} \Delta_{\text{ads}} H(W) dW \right] \end{aligned} \quad (\text{Eq. S9})$$

Here, in the calculation of  $Q_{\text{ev}}$ ,  $\Delta W \Delta_{\text{ads}} H(T_{\text{ev}})$  and  $\Delta W \int_{T_{\text{con}}}^{T_{\text{ev}}} C_p^{\text{ref}}(T) dT$  are latent heat and sensible heat taken up by the refrigerant (water in this work) in the evaporator. For the regeneration process of adsorbents

(i.e. steps of I-II and II-III),  $\int_{T_{\text{ads}}}^{T_2} C_p^{\text{ad}}(T) dT$  and  $\int_{T_2}^{T_{\text{des}}} C_p^{\text{ad}}(T) dT$  are the energy required for the adsorbent bed temperature changing from  $T_{\text{ads}}$  to  $T_{\text{des}}$ . Notably, we neglected the impact of heat exchanger and only

considered the effect of adsorbent.  $W_{\text{max}} \int_{T_{\text{ads}}}^{T_2} C_p^{\text{ref}}(T) dT$  and  $\int_{T_2}^{T_{\text{des}}} W(T) C_p^{\text{ad}}(T) dT$  are the energy required for

the temperature of refrigerant from  $T_{\text{ads}}$  to  $T_{\text{des}}$ . The last term  $\int_{W_{\text{max}}}^{W_{\text{min}}} \Delta_{\text{ads}} H(W) dW$  is the heat adsorbed for ammonia desorption in the AC system. In the terms above,  $\Delta W$  equals the difference of maximum water uptake ( $W_{\text{max}}$ ) and minimum ammonia uptake ( $W_{\text{min}}$ ).

$$\Delta W = W_{\text{max}} - W_{\text{min}} = W(T_{\text{ads}}, P_{\text{ev}}) - W(T_{\text{des}}, P_{\text{con}}) \quad (\text{Eq. S10})$$

Water equilibrium uptake ( $W$ ) can be obtained from fitted isotherms by universal adsorption isotherm

model (UAIM) <sup>8</sup> as described in Eq. S11.

$$W = W_{\text{sat}} \sum_{i=1}^n \alpha_i \left\{ \frac{\left( \frac{P}{P_0} \exp\left(\frac{\varepsilon_i}{RT}\right) \right)^{\frac{RT}{m_i}}}{1 + \left( \frac{P}{P_0} \exp\left(\frac{\varepsilon_i}{RT}\right) \right)^{\frac{RT}{m_i}}} \right\}_i \quad (\text{Eq. S11})$$

In UAIM,  $W_{\text{sat}}$  is the saturation uptake of adsorbents.  $P$  and  $T$  represent the equilibrium pressure and temperature, and  $P_0$  is the saturation pressure of water,  $R$  is the ideal gas constant. Additionally,  $\alpha_i$ ,  $\varepsilon_i$ ,  $m_i$  and  $n$  are fitting parameters that are determined by the characteristic of adsorption isotherms given in Table S2. The vaporization enthalpy ( $\Delta_{\text{vap}}H$ , unit is kJ/kg) of water that is a function of temperature.<sup>9</sup>

$$\Delta_{\text{vap}}H = C1 \times \left( 1 - \frac{T}{T_c} \right)^{C2 + C3 \times \frac{T}{T_c} + C4 \times \left( \frac{T}{T_c} \right)^2} \quad (\text{unit: kJ/mol}) \quad (\text{Eq. S12})$$

**Table S6.** Parameters for the evaporation enthalpy of ammonia in Eq. S12

| Temperature range (K) | C1     | C2     | C3     | C4      | $T_c$  |
|-----------------------|--------|--------|--------|---------|--------|
| 273.16-647.13 K       | 5.2053 | 0.3199 | -0.212 | 0.25795 | 647.13 |

The average heat of adsorption ( $\Delta_{\text{ads}}H_{\text{ave}}$ ) of adsorbents can be estimated as follows:

$$\Delta_{\text{ads}}H_{\text{ave}} = \frac{\int_{W_{\text{min}}}^{W_{\text{max}}} \Delta_{\text{ads}}H(W) dW}{W_{\text{max}} - W_{\text{min}}} \approx \frac{\int_0^{W_{\text{sat}}} \Delta_{\text{ads}}H(W) dW}{W_{\text{sat}}} \quad (\text{Eq. S13})$$

In Eq. S8, the enthalpy of adsorption ( $\Delta_{\text{ads}}H$ ) is calculated using the predicted adsorption isotherms obtained by UAIM at varying temperatures according to the Clausius-Clapeyron equation shown in Eq. S16.

$$\Delta_{\text{ads}}H(W) = -R \frac{\partial(\ln p)}{\partial(1/T)} \quad (\text{Eq. S14})$$

In addition,  $C_p^{\text{ref}}$  and  $C_p^{\text{ad}}$  are the specific heat capacity of refrigerant and adsorbent, respectively. They are considered to be constant ( $C_p$  varies slightly with temperature used in fact) of 4.2 kJ/(kg·K) for water and 1 kJ/(kg·K) for adsorbents (reasonable value for a variety of adsorbents).<sup>5</sup>

Then, the formula for calculating SCE and  $\text{COP}_C$  can be obtained by substitution and simplification.

$$\text{SCE} = \Delta W \left[ \Delta_{\text{vap}} H(T_{\text{ev}}) - C_{\text{p}}^{\text{ref}} (T_{\text{con}} - T_{\text{ev}}) \right] \quad (\text{Eq. S15})$$

$$\text{COP}_{\text{c}} = \frac{\Delta W \left[ \Delta_{\text{vap}} H(T_{\text{ev}}) - C_{\text{p}}^{\text{ref}} (T_{\text{con}} - T_{\text{ev}}) \right]}{C_{\text{p}}^{\text{ad}} (T_{\text{des}} - T_{\text{ads}}) + C_{\text{p}}^{\text{ref}} \left[ W_{\text{max}} (T_2 - T_{\text{ads}}) + \int_{T_2}^{T_{\text{des}}} W(T) dT \right] - \Delta W \Delta_{\text{ads}} H_{\text{ave}}} \quad (\text{Eq. S16})$$

## S5. Supplementary results of machine learning

**Table S7.** The hyper-parameter setting and predictive effect of machine learning models (S-I) including random forest (RF) and artificial neural network (ANN)

| Model     | Aim            | Hyper-parameter (adjustable)                                                                           | Cross-validation R <sup>2</sup> | Predictive effect        |                |               |                     |           |          |                |       |       |
|-----------|----------------|--------------------------------------------------------------------------------------------------------|---------------------------------|--------------------------|----------------|---------------|---------------------|-----------|----------|----------------|-------|-------|
|           |                |                                                                                                        |                                 | Trainin g R <sup>2</sup> | Trainin g RMSE | Trainin g MAE | Test R <sup>2</sup> | Test RMSE | Test MAE | R <sup>2</sup> | RMSE  | MAE   |
| RF (S-I)  | Predict uptake | criterion='mse',<br>min_samples_leaf=1,<br>min_samples_split=2,<br>n_estimators=200                    | 0.924                           | 0.991                    | 0.021          | 0.010         | 0.948               | 0.050     | 0.025    | 0.982          | 0.029 | 0.013 |
| ANN (S-I) | Predict uptake | activation='relu',<br>hidden_layer_sizes=(43,<br>43, 43),<br>learning_rate_init=0.01,<br>solver='adam' | 0.894                           | 0.922                    | 0.060          | 0.041         | 0.915               | 0.065     | 0.044    | 0.921          | 0.061 | 0.041 |

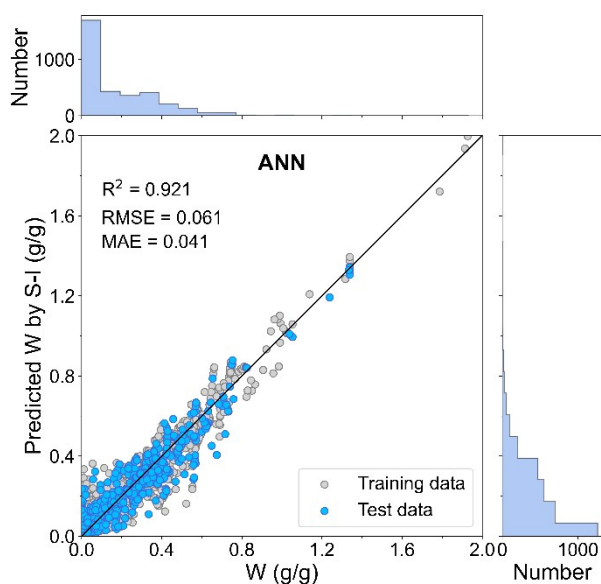

**Figure S4.** (a) The predicted results of water uptake (W) by artificial neural network models (ANN, S-I)

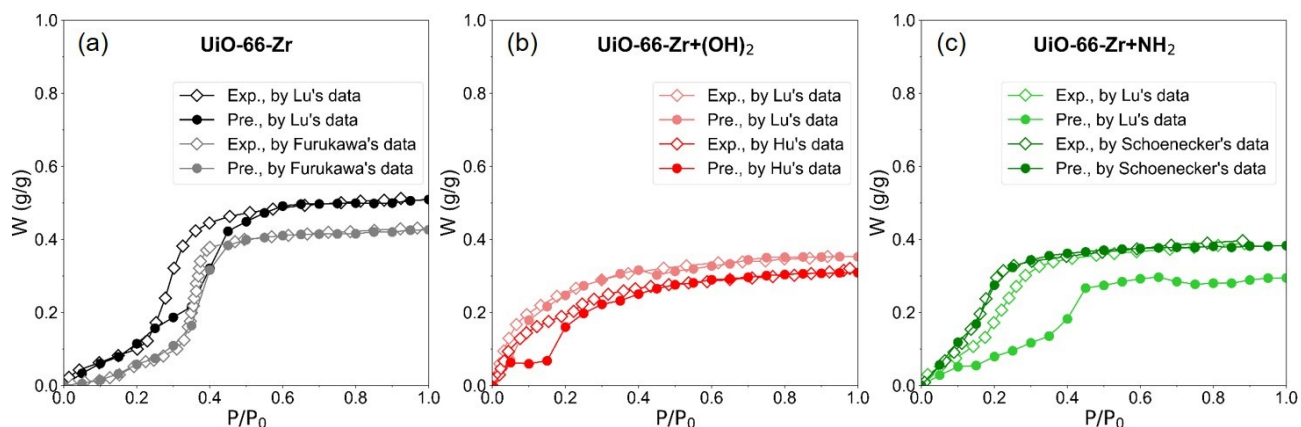

**Figure S5.** The experimental and predicted water adsorption isotherms of (a) UiO-66-Zr<sup>10,11</sup>, (b) UiO-66-Zr+(OH)<sub>2</sub><sup>10,12</sup>, (c) UiO-66-Zr+NH<sub>2</sub><sup>10,13</sup> were reported by different research groups. In all figures, the diamond markers represent experimental data from our EWAID or scientific literature, the dots represent predicted data by random forest model (RF, S-I).

**Table S8.** The structural characteristics of adsorbents in Figure S5

| No. | Adsorbent [Ref.]                                             | Species | S <sub>a</sub> (m <sup>2</sup> /g) | V <sub>a</sub> (cm <sup>3</sup> /g) | D <sub>p</sub> (Å) |
|-----|--------------------------------------------------------------|---------|------------------------------------|-------------------------------------|--------------------|
| 1   | UiO-66-Zr (Lu's work) <sup>10</sup>                          | MOF     | 1421                               | 0.58                                | 8.6                |
| 2   | UiO-66-Zr (Furukawa's work) <sup>11</sup>                    | MOF     | 1290                               | 0.49                                | 8.4                |
| 3   | UiO-66-Zr+(OH) <sub>2</sub> (Lu's work) <sup>10</sup>        | MOF     | 1065                               | 0.41                                | 6.4                |
| 4   | UiO-66-Zr+(OH) <sub>2</sub> (Hu's work) <sup>12</sup>        | MOF     | 1230                               | 0.56                                | 5.9                |
| 5   | UiO-66-Zr-NH <sub>2</sub> (Lu's work) <sup>10</sup>          | MOF     | 1280                               | 0.55                                | 6.2                |
| 6   | UiO-66-Zr+NH <sub>2</sub> (Schoenecker's work) <sup>13</sup> | MOF     | 1040                               | 0.57                                | 6.0                |

**Table S9.** The hyper-parameter setting and predictive effect of machine learning models (I-P) including random forest (RF) and neural network (NN)

| Model    | Aim         | Hyper-parameter (adjustable)                                                        | Cross validation R <sup>2</sup> | Predictive effect       |               |              |                     |           |          |                |        |        |
|----------|-------------|-------------------------------------------------------------------------------------|---------------------------------|-------------------------|---------------|--------------|---------------------|-----------|----------|----------------|--------|--------|
|          |             |                                                                                     |                                 | Training R <sup>2</sup> | Training RMSE | Training MAE | Test R <sup>2</sup> | Test RMSE | Test MAE | R <sup>2</sup> | RMSE   | MAE    |
| RF (I-P) | Predict SCE | criterion='mse',<br>min_samples_leaf=1,<br>min_samples_split=2,<br>n_estimators=100 | 0.706                           | 0.968                   | 41.156        | 25.166       | 0.795               | 91.804    | 57.040   | 0.935          | 57.511 | 31.541 |

|              |                          |                                                                                                            |       |       |        |        |       |        |        |       |        |        |
|--------------|--------------------------|------------------------------------------------------------------------------------------------------------|-------|-------|--------|--------|-------|--------|--------|-------|--------|--------|
|              | Predict COP <sub>C</sub> | criterion='mse',<br>min_samples_leaf=1,<br>min_samples_split=3,<br>n_estimators=200                        | 0.758 | 0.962 | 0.045  | 0.029  | 0.816 | 0.102  | 0.076  | 0.931 | 0.061  | 0.039  |
| ANN<br>(I-P) | Predict SCE              | activation='logistic',<br>hidden_layer_sizes=(45, 45),<br>learning_rate_init=0.01,<br>solver='adam'        | 0.745 | 0.832 | 94.520 | 62.510 | 0.798 | 91.519 | 59.849 | 0.827 | 93.927 | 61.978 |
|              | Predict COP <sub>C</sub> | activation='logistic',<br>hidden_layer_sizes=(48, 48,<br>48),<br>learning_rate_init=0.01,<br>solver='adam' | 0.691 | 0.733 | 0.119  | 0.086  | 0.653 | 0.140  | 0.105  | 0.717 | 0.123  | 0.090  |

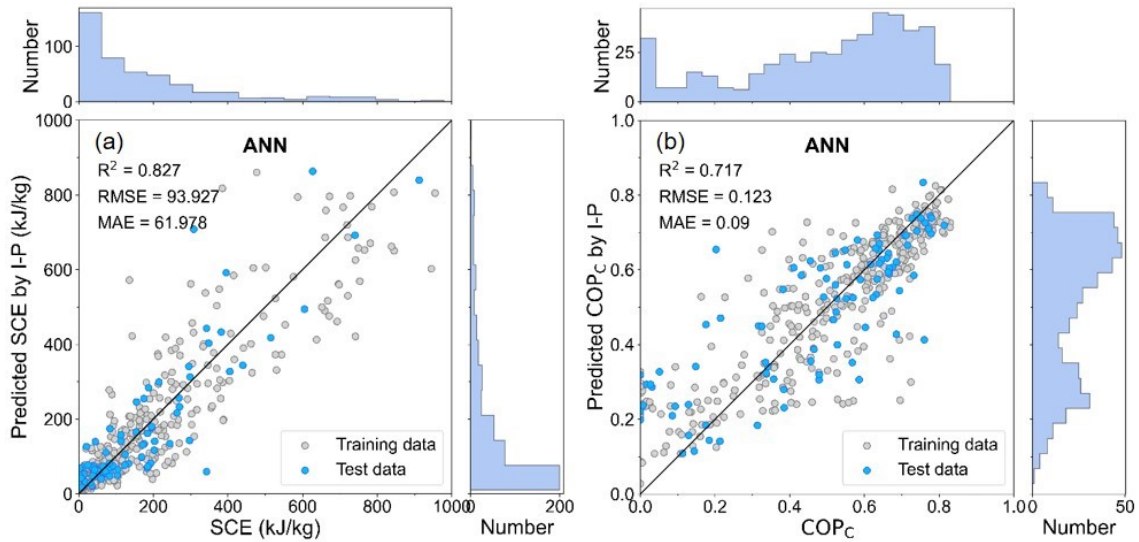

**Figure S6.** The predicted results of (a) specific cooling effect (SCE) and (b) coefficient of performance for cooling (COP<sub>C</sub>) by artificial neural network models (ANN, I-P).

**Table S10.** The hyper-parameter setting and predictive effect of machine learning models (S-P) including random forest (RF) and artificial neural network (ANN)

| Model    | Aim         | Hyper-parameter (adjustable)                                                        | Cross validation R <sup>2</sup> | Predictive effect       |               |              |                     |           |          |                |         |         |
|----------|-------------|-------------------------------------------------------------------------------------|---------------------------------|-------------------------|---------------|--------------|---------------------|-----------|----------|----------------|---------|---------|
|          |             |                                                                                     |                                 | Training R <sup>2</sup> | Training RMSE | Training MAE | Test R <sup>2</sup> | Test RMSE | Test MAE | R <sup>2</sup> | RMSE    | MAE     |
| RF (S-P) | Predict SCE | criterion='mae',<br>min_samples_leaf=2,<br>min_samples_split=2,<br>n_estimators=300 | -0.039                          | 0.630                   | 146.277       | 100.430      | 0.030               | 264.071   | 219.760  | 0.488          | 176.621 | 124.619 |

|              |                             |                                                                                                          |        |       |         |        |        |         |         |       |         |         |
|--------------|-----------------------------|----------------------------------------------------------------------------------------------------------|--------|-------|---------|--------|--------|---------|---------|-------|---------|---------|
|              | Predict<br>COP <sub>C</sub> | criterion='mse',<br>min_samples_leaf=1,<br>min_samples_split=3,<br>n_estimators=50                       | 0.113  | 0.834 | 0.096   | 0.075  | 0.082  | 0.258   | 0.211   | 0.646 | 0.144   | 0.102   |
| ANN<br>(S-P) | Predict<br>SCE              | activation='tanh',<br>hidden_layer_sizes=(13,<br>13),<br>learning_rate_init=0.000<br>1,<br>solver='adam' | -0.027 | 0.752 | 123.097 | 80.034 | -0.063 | 250.563 | 186.046 | 0.593 | 157.504 | 101.523 |
|              | Predict<br>COP <sub>C</sub> | activation='relu',<br>hidden_layer_sizes=(24,<br>24),<br>learning_rate_init=0.000<br>1,<br>solver='adam' | 0.001  | 0.744 | 0.128   | 0.087  | -1.734 | 0.300   | 0.206   | 0.467 | 0.177   | 0.111   |

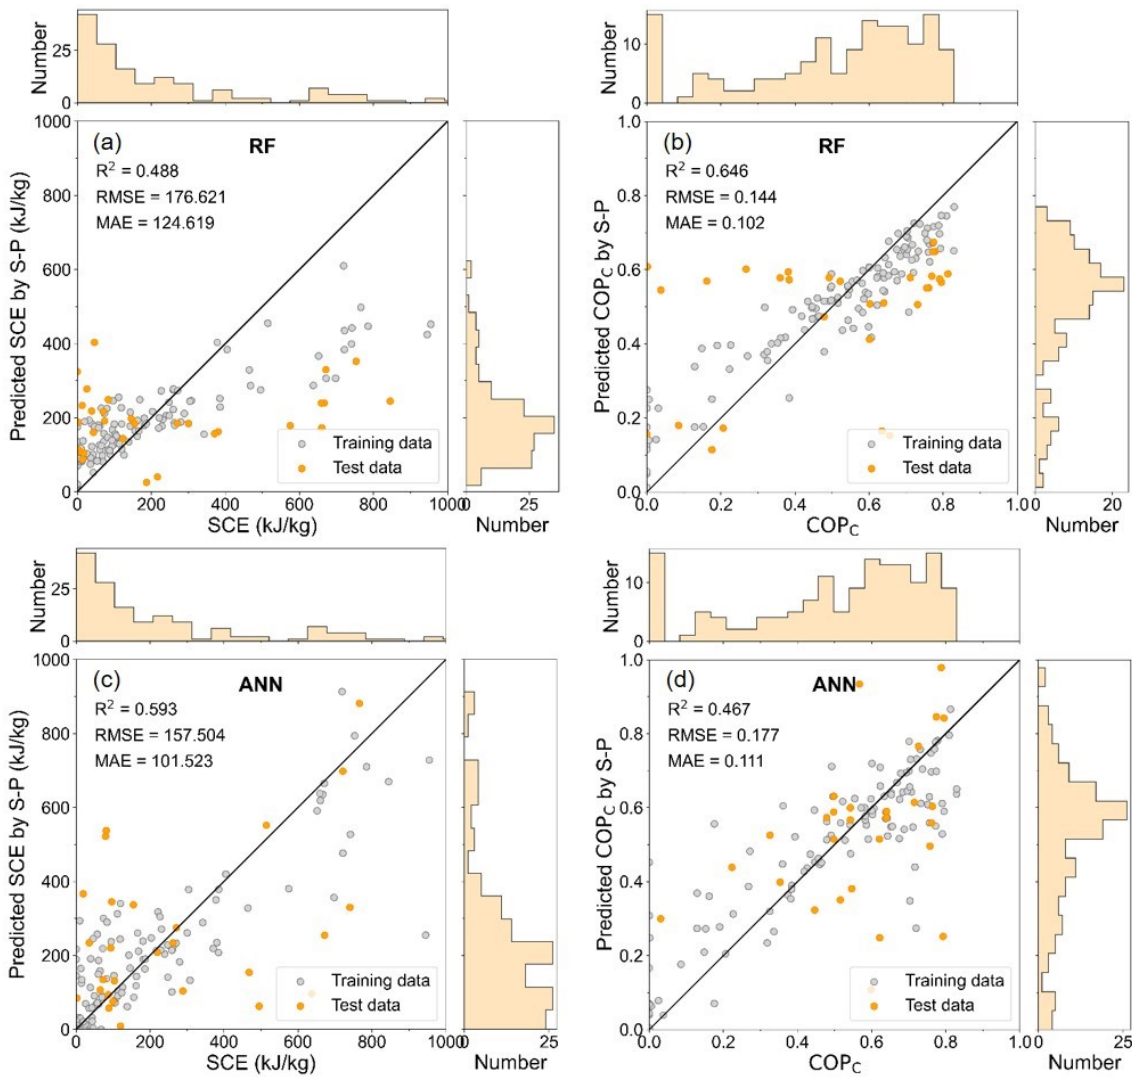

**Figure S7.** The predicted results of specific cooling effect (SCE) and coefficient of performance for cooling ( $COP_c$ ) by machine learning models (S-P) including (a-b) random forest (RF) and (c-d) artificial neural network (ANN) model



## References

1. Salmasi, F.; Nouri, M.; Sihag, P.; Abraham, J., Application of SVM, ANN, GRNN, RF, GP and RT models for predicting discharge coefficients of oblique sluice gates using experimental data. *Water Supply* **2021**, *21* (1), 232-248.
2. Rojas, R.; Rojas, R., The backpropagation algorithm. *Neural networks: a systematic introduction* **1996**, 149-182.
3. Anderson, R.; Biong, A.; Gomez-Gualdrón, D. A., Adsorption Isotherm Predictions for Multiple Molecules in MOFs Using the Same Deep Learning Model. *J Chem Theory Comput* **2020**, *16* (2), 1271-1283.
4. Pedregosa, F.; Varoquaux, G.; Gramfort, A.; Michel, V.; Thirion, B.; Grisel, O.; Blondel, M.; Prettenhofer, P.; Weiss, R.; Dubourg, V., Scikit-learn: Machine learning in Python. *the Journal of machine Learning research* **2011**, *12*, 2825-2830.
5. de Lange, M. F.; Verouden, K. J.; Vlugt, T. J.; Gascon, J.; Kapteijn, F., Adsorption-Driven Heat Pumps: The Potential of Metal-Organic Frameworks. *Chem. Rev.* **2015**, *115* (22), 12205-12250.
6. Liu, Z.; Li, W.; Moghadam, P. Z.; Li, S., Screening adsorbent–water adsorption heat pumps based on an experimental water adsorption isotherm database. *Sustainable Energy & Fuels* **2021**, *5* (4), 1075-1084.
7. Aristov, Y. I.; Tokarev, M. M.; Sharonov, V. E., Universal relation between the boundary temperatures of a basic cycle of sorption heat machines. *Chem. Eng. Sci.* **2008**, *63* (11), 2907-2912.
8. Ng, K. C.; Burhan, M.; Shahzad, M. W.; Ismail, A. B., A Universal Isotherm Model to Capture Adsorption Uptake and Energy Distribution of Porous Heterogeneous Surface. *Sci. Rep.* **2017**, *7* (1), 10634.
9. Perry, R. H., Physical and chemical data. *Perry's chemical engineers' handbook* **1984**, 7-374.
10. Lu, F.-F.; Gu, X.-W.; Wu, E.; Li, B.; Qian, G., Systematic evaluation of water adsorption in isorecticular UiO-type metal–organic frameworks. *J. Mater. Chem. A* **2023**, *11* (3), 1246-1255.
11. Furukawa, H.; Gandara, F.; Zhang, Y. B.; Jiang, J.; Queen, W. L.; Hudson, M. R.; Yaghi, O. M., Water adsorption in porous metal-organic frameworks and related materials. *J. Am. Chem. Soc.* **2014**, *136* (11), 4369-4381.

12. Hu, Z.; Wang, Y.; Farooq, S.; Zhao, D., A highly stable metal-organic framework with optimum aperture size for CO<sub>2</sub> capture. *AIChE J.* **2017**, *63* (9), 4103-4114.
13. Schoenecker, P. M.; Carson, C. G.; Jasuja, H.; Flemming, C. J.; Walton, K. S., Effect of water adsorption on retention of structure and surface area of metal-organic frameworks. *Ind. Eng. Chem. Res.* **2012**, *51* (18), 6513-6519.
